# Supplementary material
Source: publisher site journal article supplement (https://www.dovepress.com/article/403413)

# **Ultrasonic-assisted synthesis of heterocyclic curcumin analogs as Antidiabetic, Antibacterial and Antioxidant Agents combined with *in vitro* and *in silico* studies**

**Demis Zelelew<sup>1</sup>, Milkyas Endale<sup>1\*</sup>, Yadessa Melaku<sup>1</sup>, Teshome Geremew<sup>2</sup>, Rajalakshmanan Eswaramoorthy<sup>3</sup>, Lemma Teshome Tufa<sup>1,4</sup>, Youngeun Choi<sup>5</sup>, Jaebeom Lee<sup>5</sup>**

*<sup>1</sup>Department of Applied Chemistry, School of Applied Natural Science, Adama Science and Technology University, P.O. Box 1888, Adama, Ethiopia; <sup>2</sup>Department of Applied Biology, School of Applied Natural Science, Adama Science and Technology University, P.O. Box 1888, Adama, Ethiopia; <sup>3</sup>Department of Biomaterials, Saveetha Dental College and Hospital, Saveetha University, Chennai 600 077, India; <sup>4</sup>Research Institute of Materials Chemistry, Chungnam National University, Daejeon 34134, Republic of Korea; <sup>5</sup>Department of Chemistry, Department of Chemistry Engineering and Applied Chemistry, Chungnam National University, Daejeon 34134, Republic of Korea*

**Correspondence:** Milkyas Endale; Department of Applied Chemistry, School of Applied Natural Science, Adama Science and Technology University, P.O. Box 1888, Adama, Ethiopia.  
E-mail: [milkyas.endale@astu.edu.et](mailto:milkyas.endale@astu.edu.et), [milkyasendale@yahoo.com](mailto:milkyasendale@yahoo.com); [demis1921zelelew@gmail.com](mailto:demis1921zelelew@gmail.com)

---

### Appendix Ia. $^1\text{H}$ -NMR spectrum (400 MHz, $\text{MeOD-}d_4$ ) of compound **3**

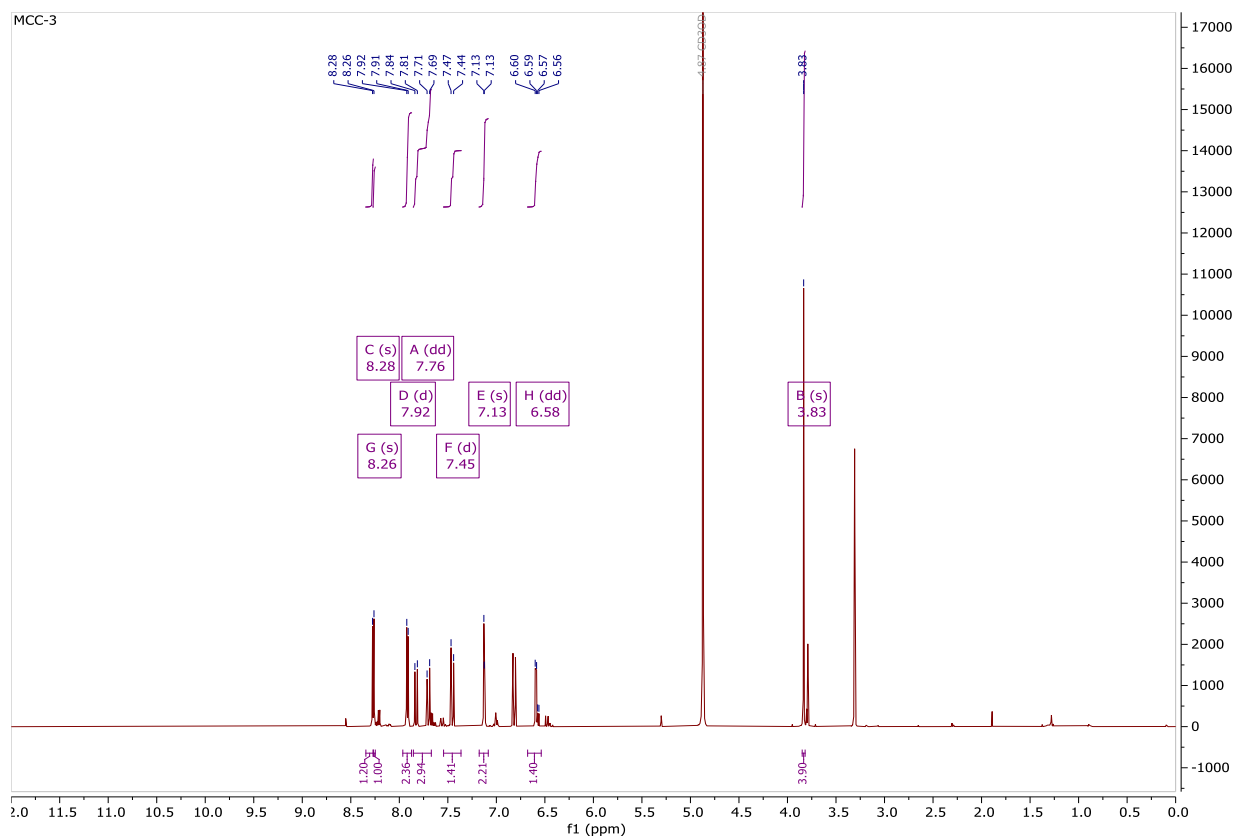

### Appendix Ib. $^{13}\text{C}$ -NMR spectrum (100 MHz, $\text{MeOD-}d_4$ ) of compound **3**

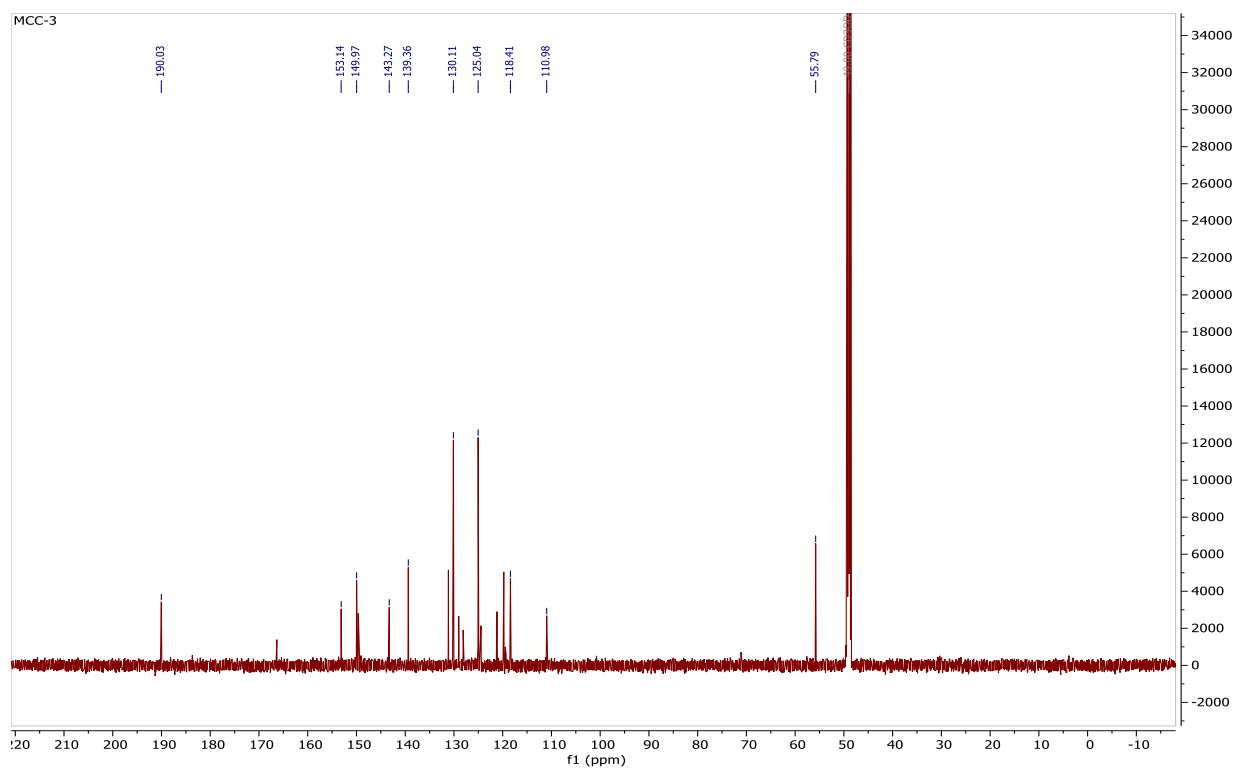

**Appendix Ic.**  $^{13}\text{C}$ -DEPT-135 NMR spectrum (100 MHz, MeOD- $d_4$ ) of compound **3**

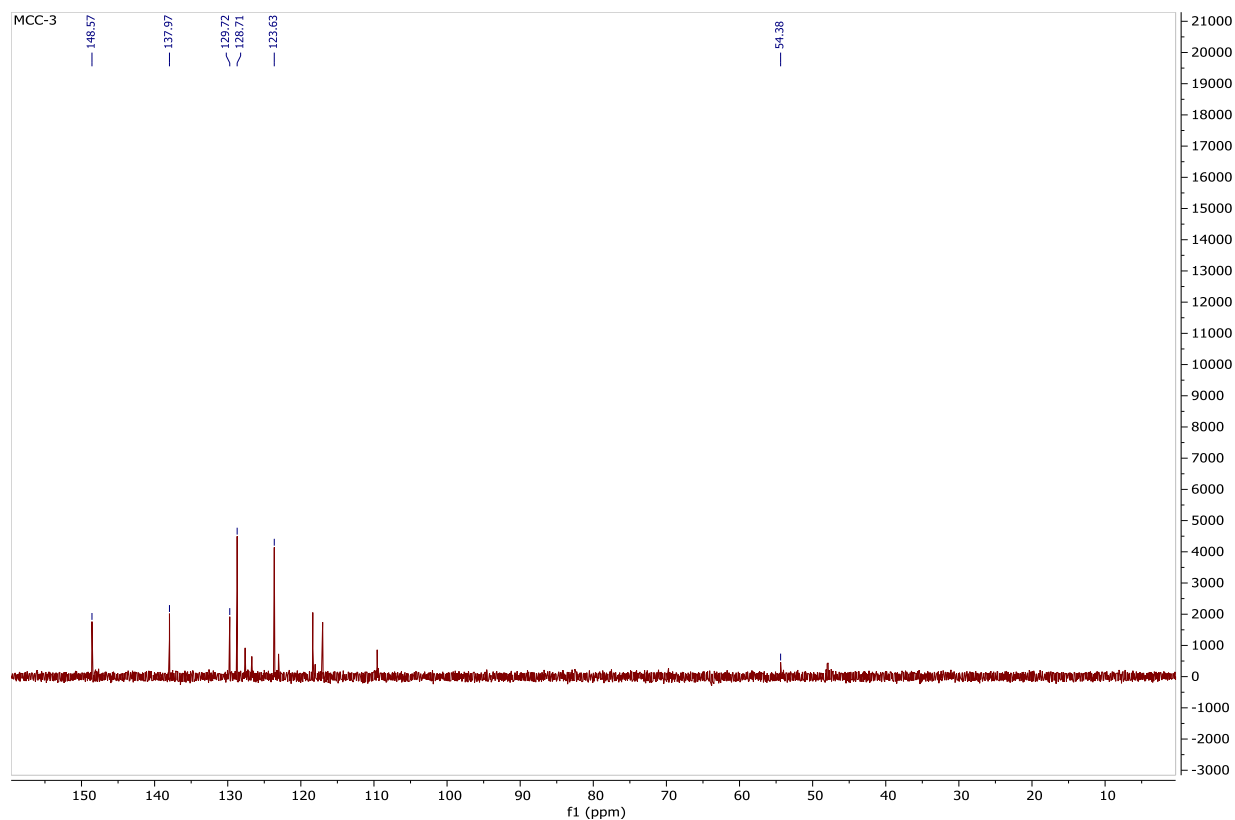

**Appendix IIa.**  $^1\text{H}$ -NMR spectrum (400 MHz, MeOD- $d_4$ ) of compound **4**

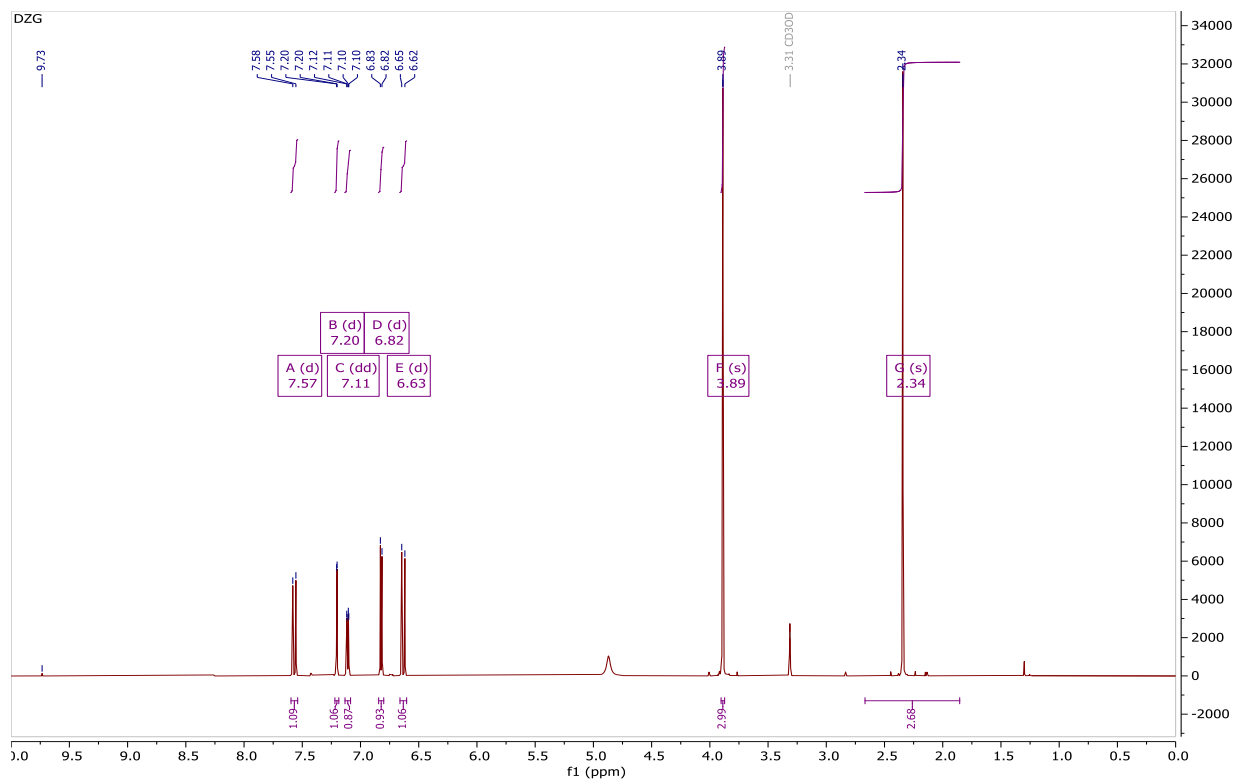

**Appendix IIb.**  $^{13}\text{C}$  -NMR spectrum (100 MHz,  $\text{MeOD-}d_4$ ) of compound **4**

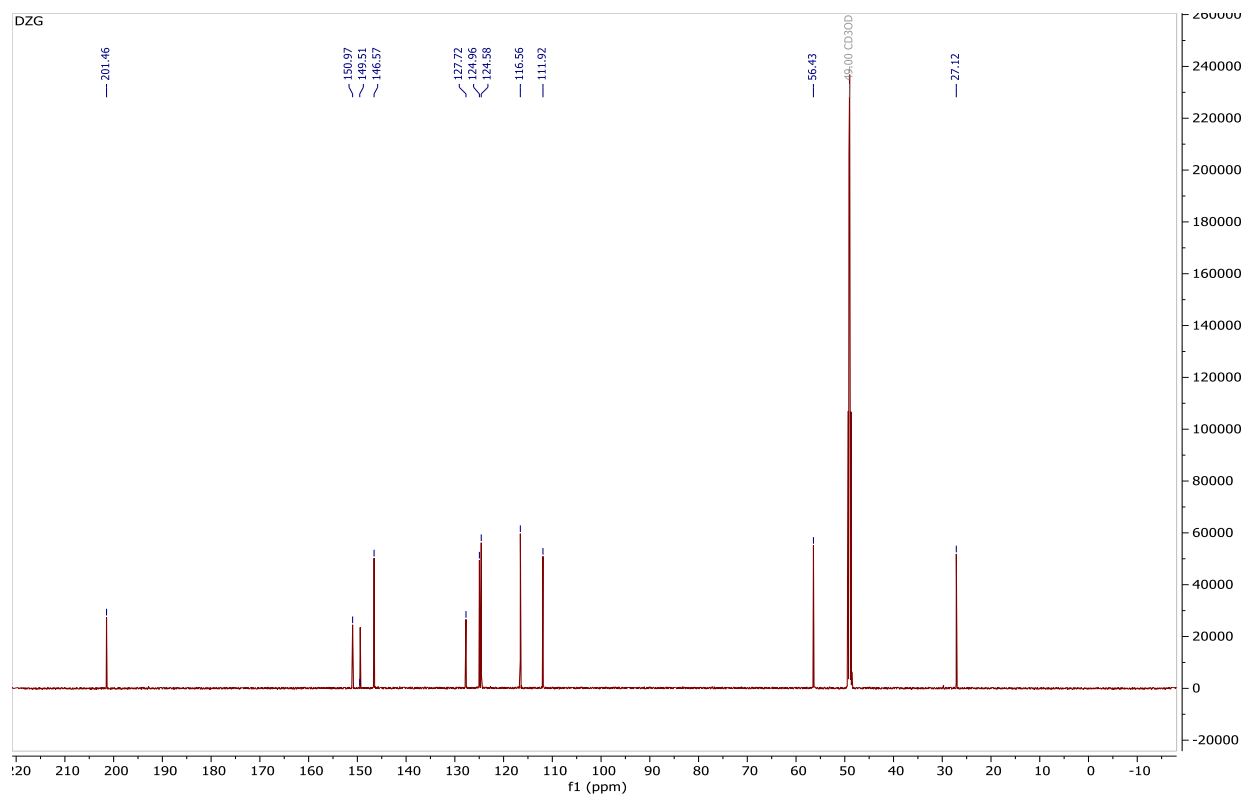

**Appendix IIc.**  $^{13}\text{C}$  -DEPT-135 NMR spectrum (100 MHz,  $\text{MeOD-}d_4$ ) of compound **4**

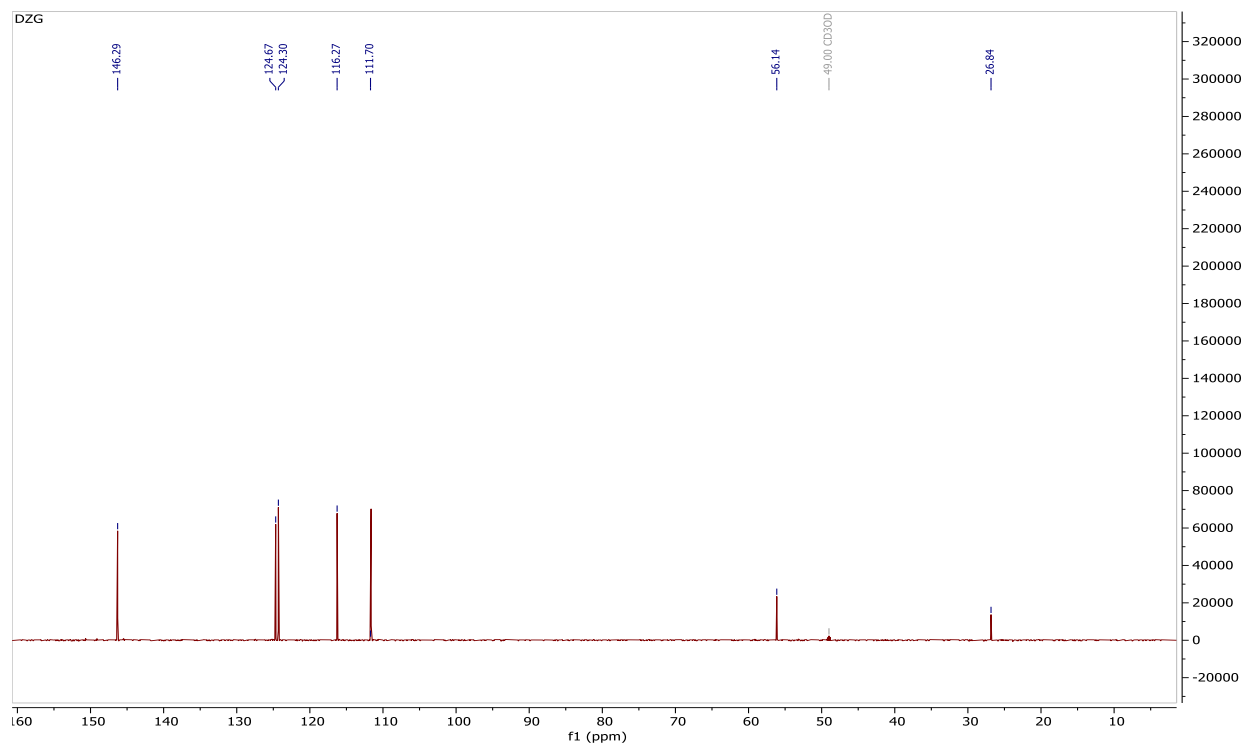

**Appendix IIIa.**  $^1\text{H-NMR}$  spectrum (400 MHz,  $\text{MeOD-}d_4$ ) of compound **5**

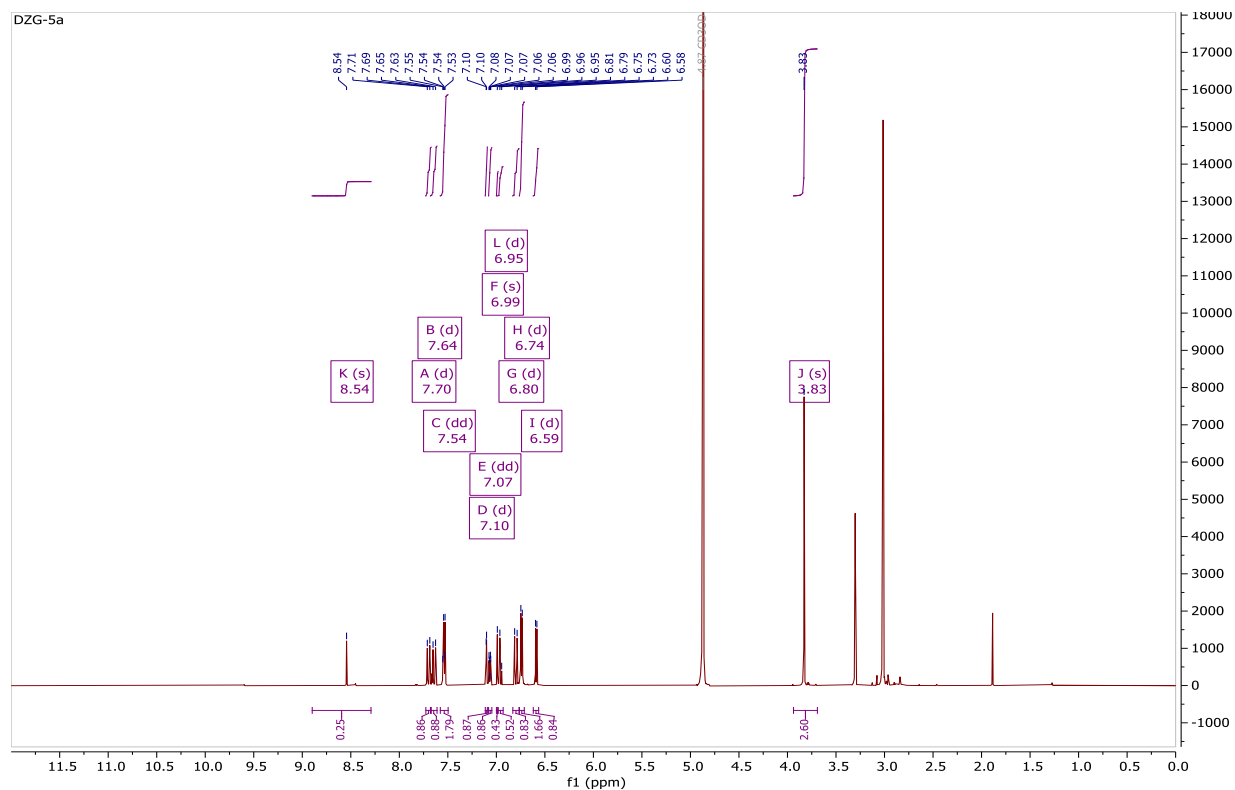

**Appendix IIIb.**  $^{13}\text{C-NMR}$  spectrum (100 MHz,  $\text{MeOD-}d_4$ ) of compound **5**

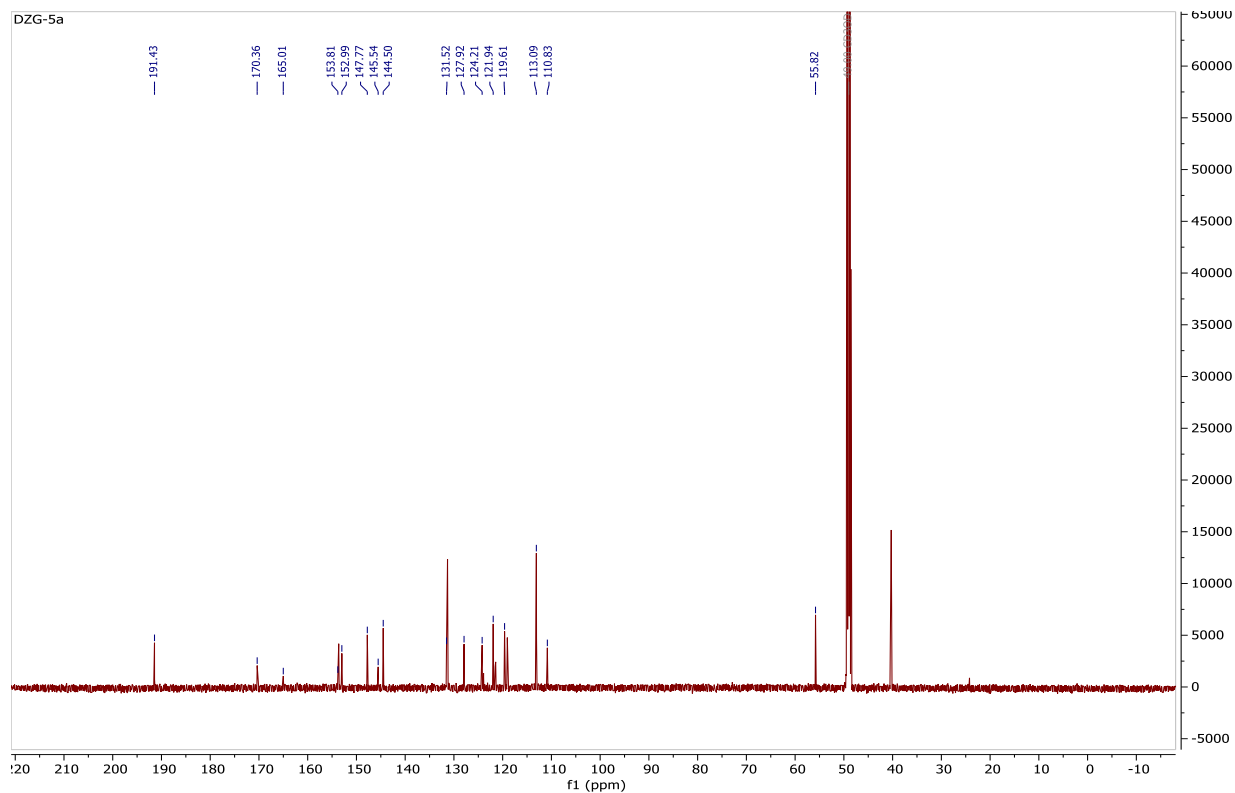

**Appendix IIIc.**  $^{13}\text{C}$  –DEPT-135 NMR spectrum (100 MHz, MeOD- $d_4$ ) of compound **5**

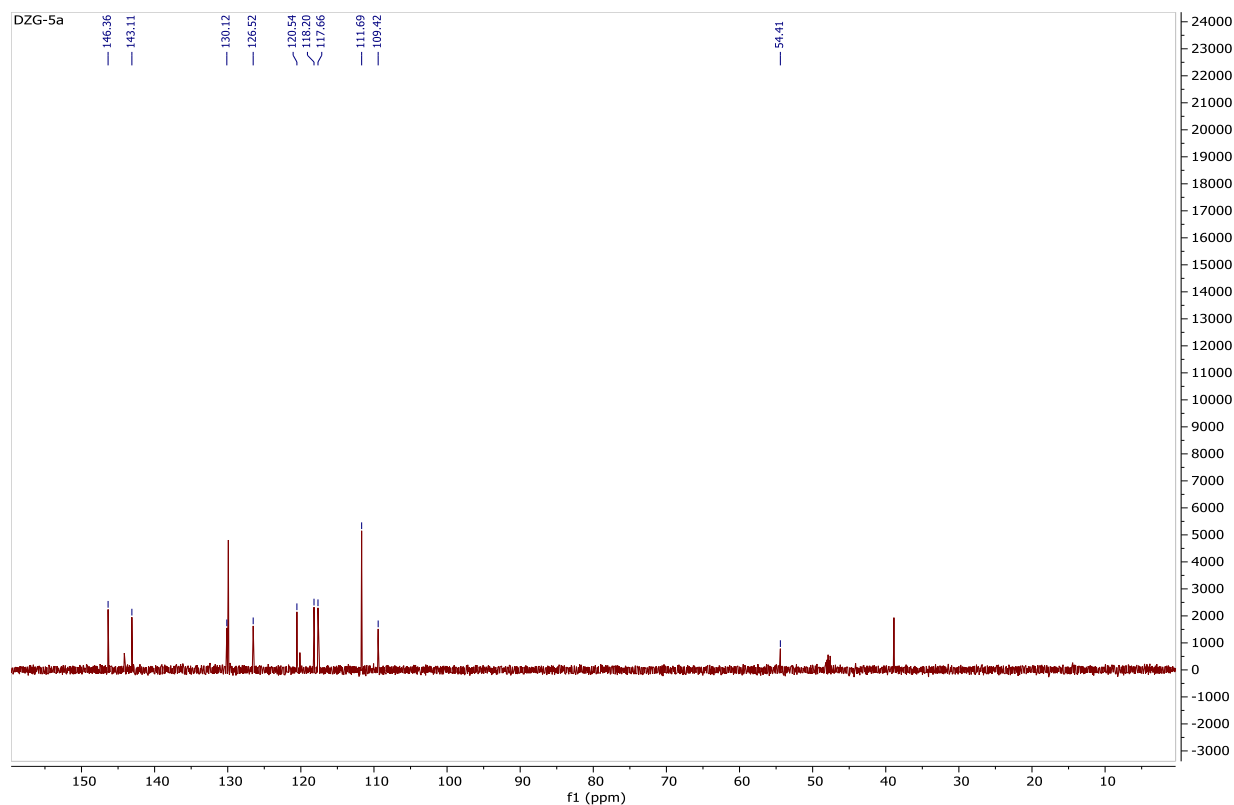

**Appendix IVa.**  $^1\text{H}$ -NMR spectrum (400 MHz, MeOD- $d_4$ ) of compound **6**

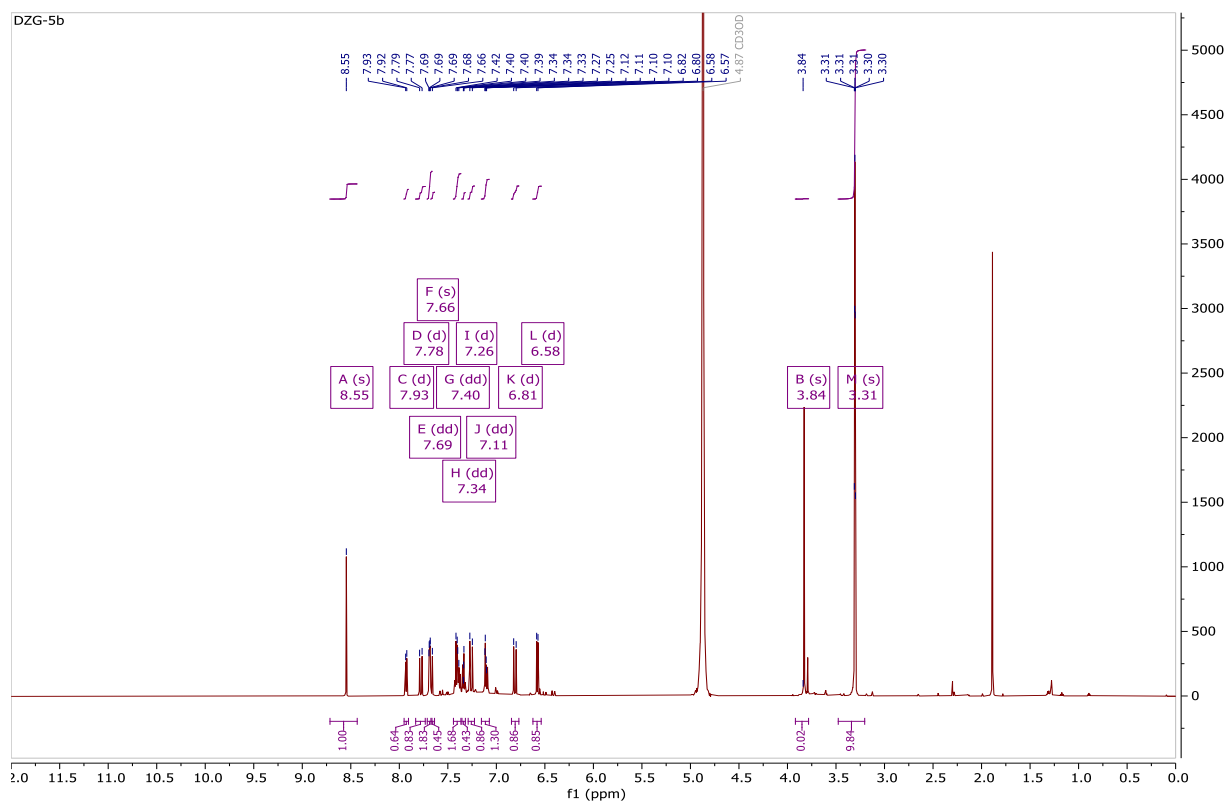

**Appendix IVb.**  $^{13}\text{C}$  -NMR spectrum (100 MHz,  $\text{MeOD-}d_4$ ) of compound **6**

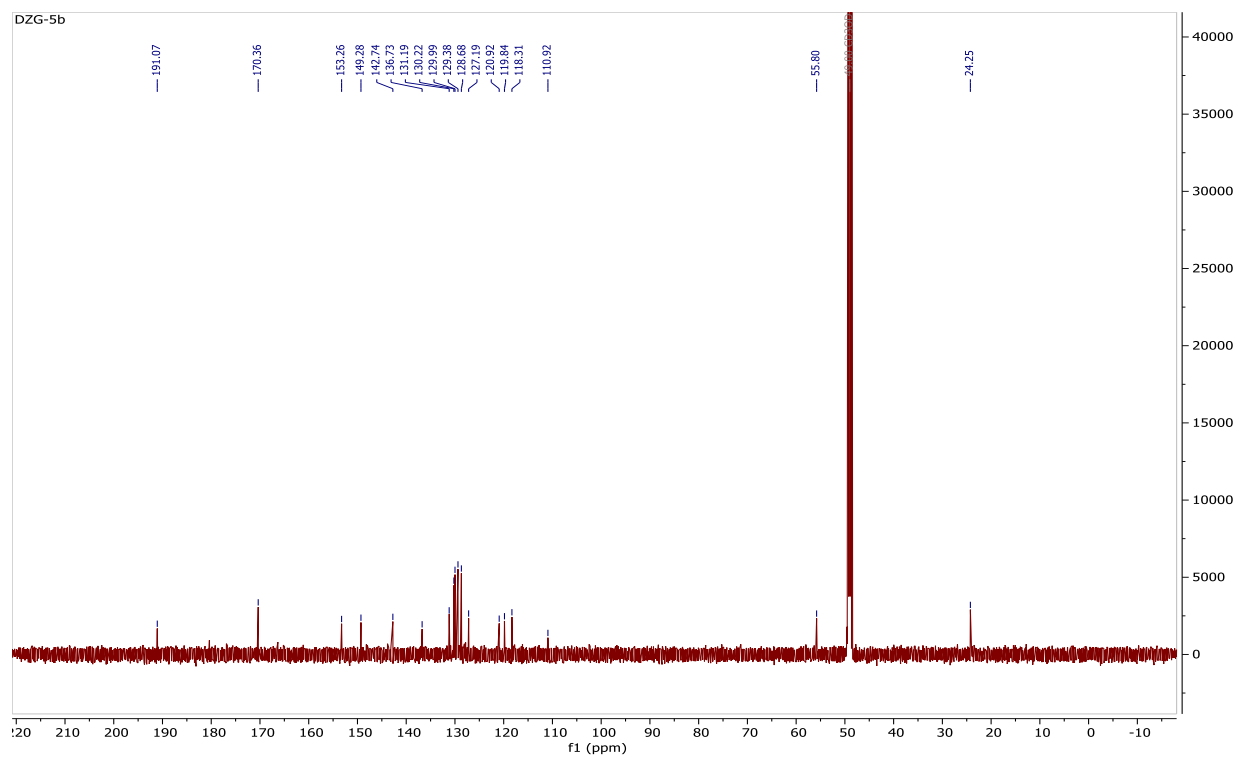

**Appendix IVc.**  $^{13}\text{C}$  -DEPT-135 NMR spectrum (100 MHz,  $\text{MeOD-}d_4$ ) of compound **6**

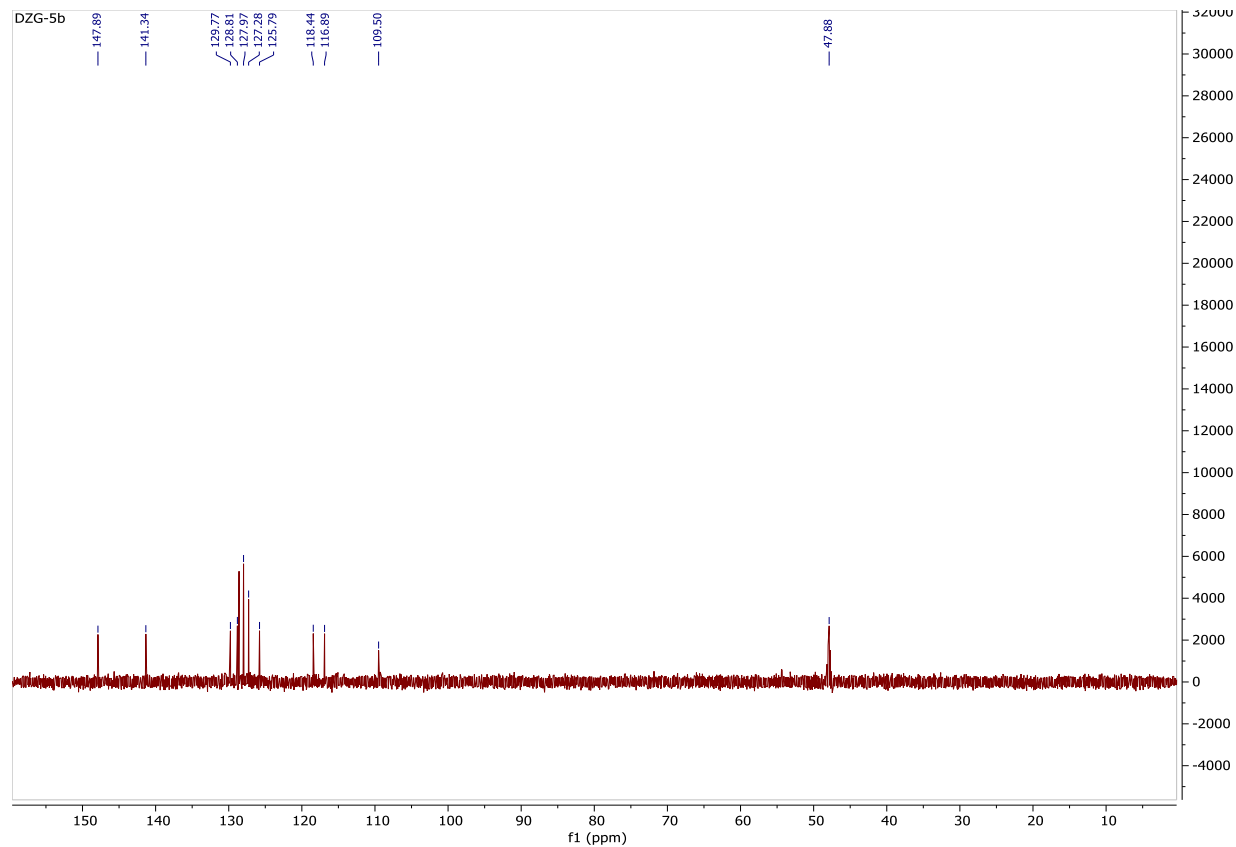

Appendix Va.  $^1\text{H-NMR}$  spectrum (400 MHz,  $\text{MeOD-}d_4$ ) of compound **7**

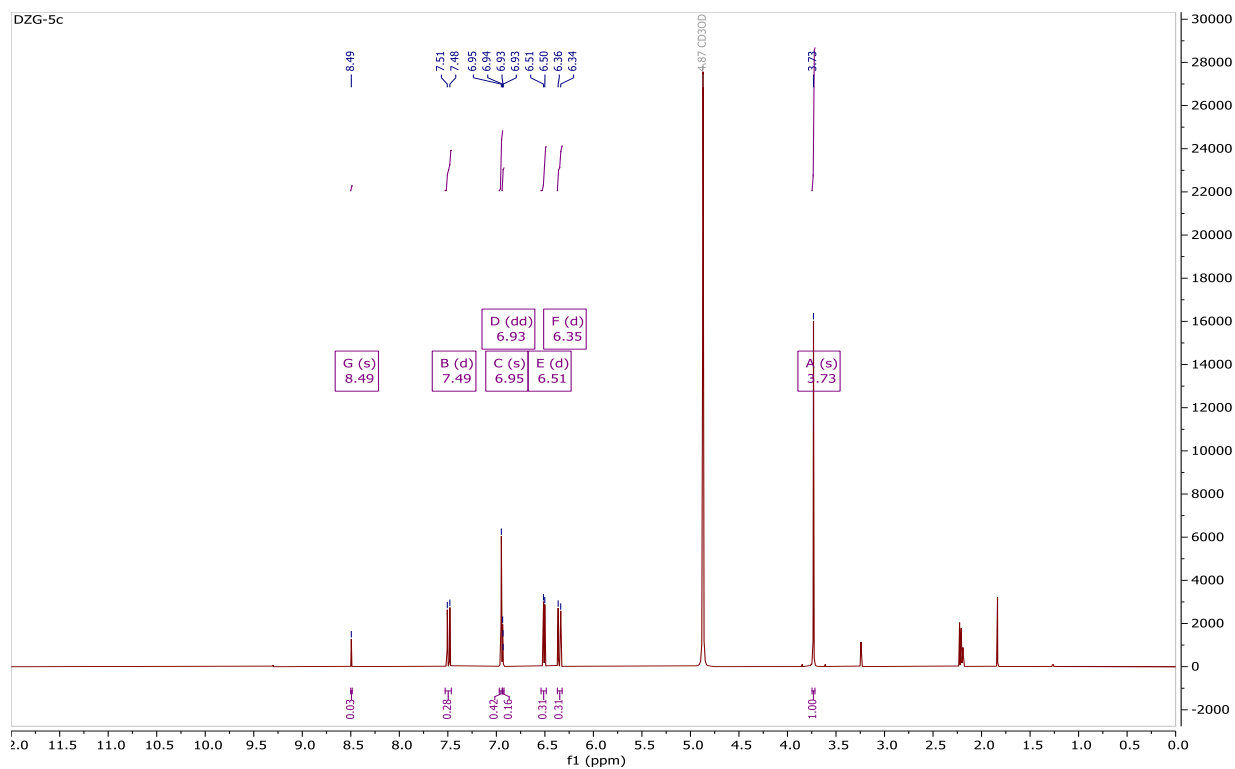

Appendix Vb.  $^{13}\text{C-NMR}$  spectrum (100 MHz,  $\text{MeOD-}d_4$ ) of compound **7**

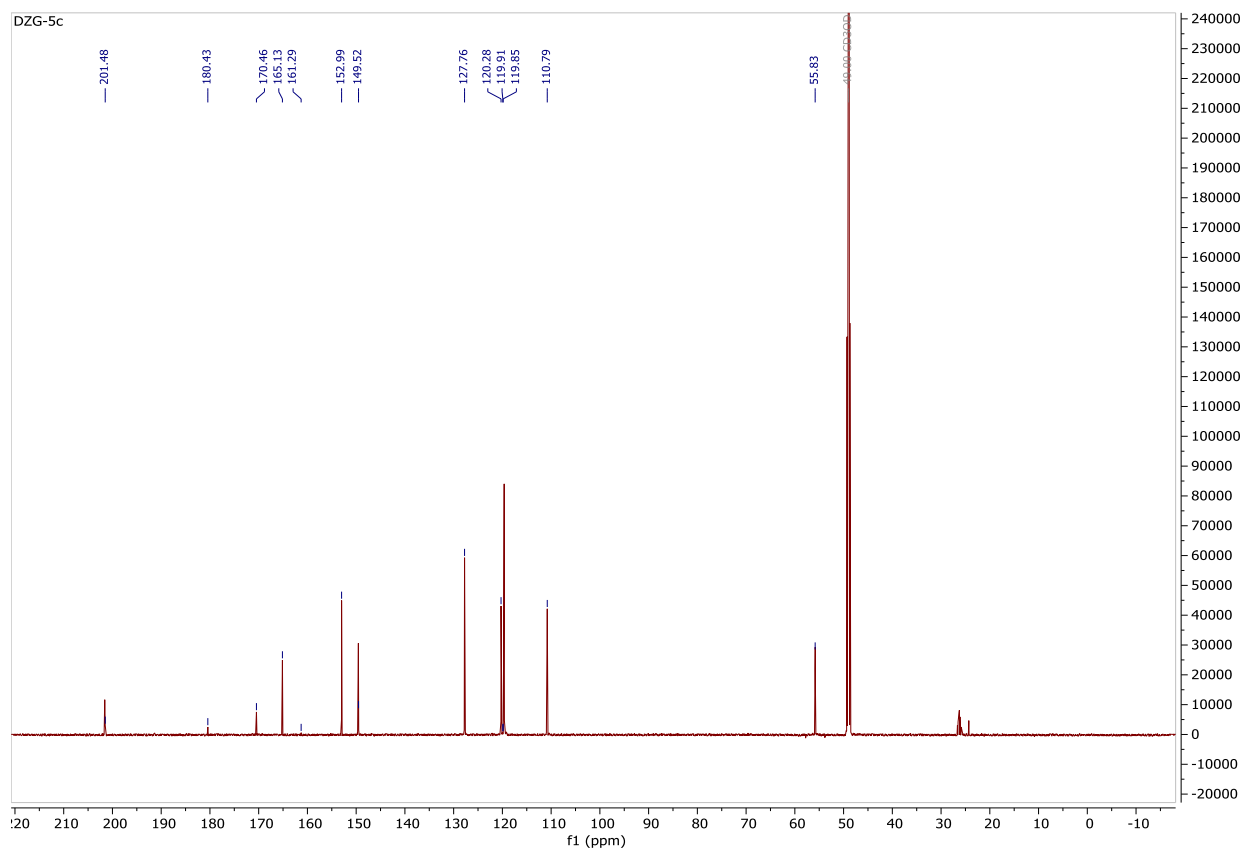



**Appendix Vc.**  $^{13}\text{C}$ -DEPT-135 NMR spectrum (100 MHz, MeOD- $d_4$ ) of compound **7**

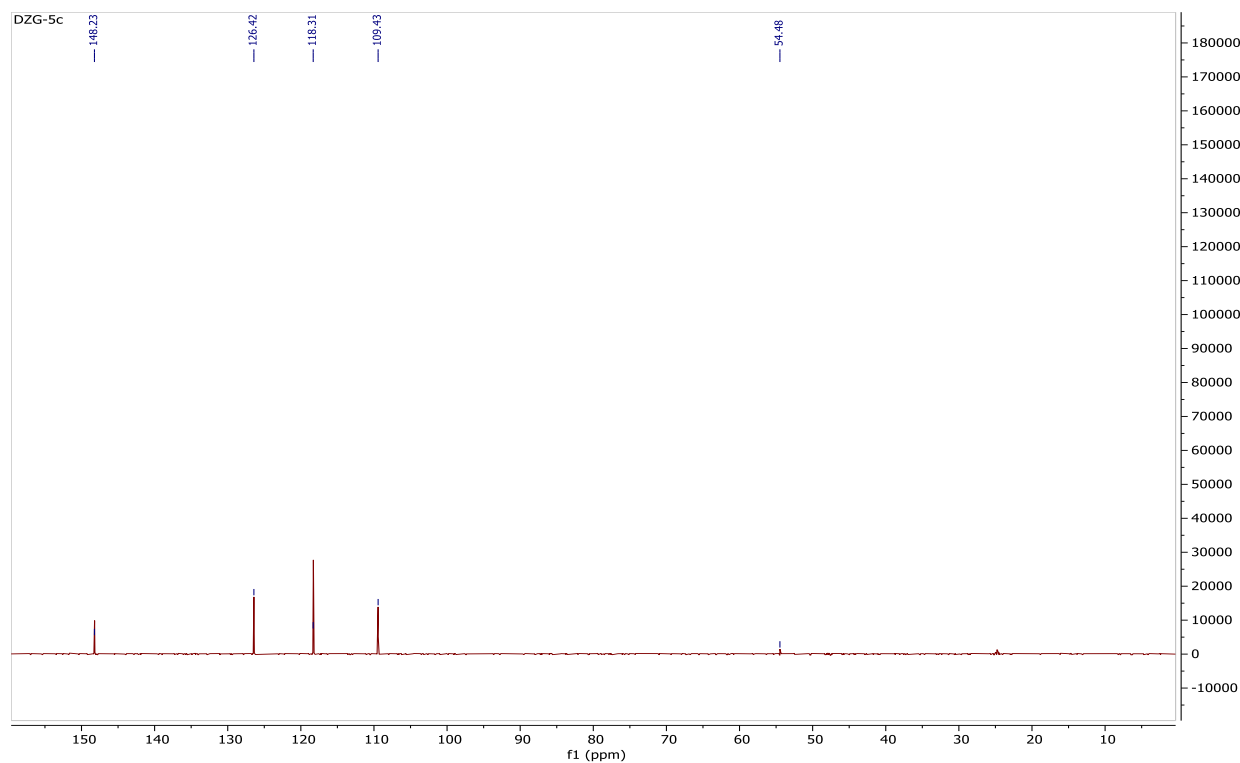

**Appendix VIa.**  $^1\text{H}$ -NMR spectrum (400 MHz, DMSO- $d_6$ ) of compound **8**

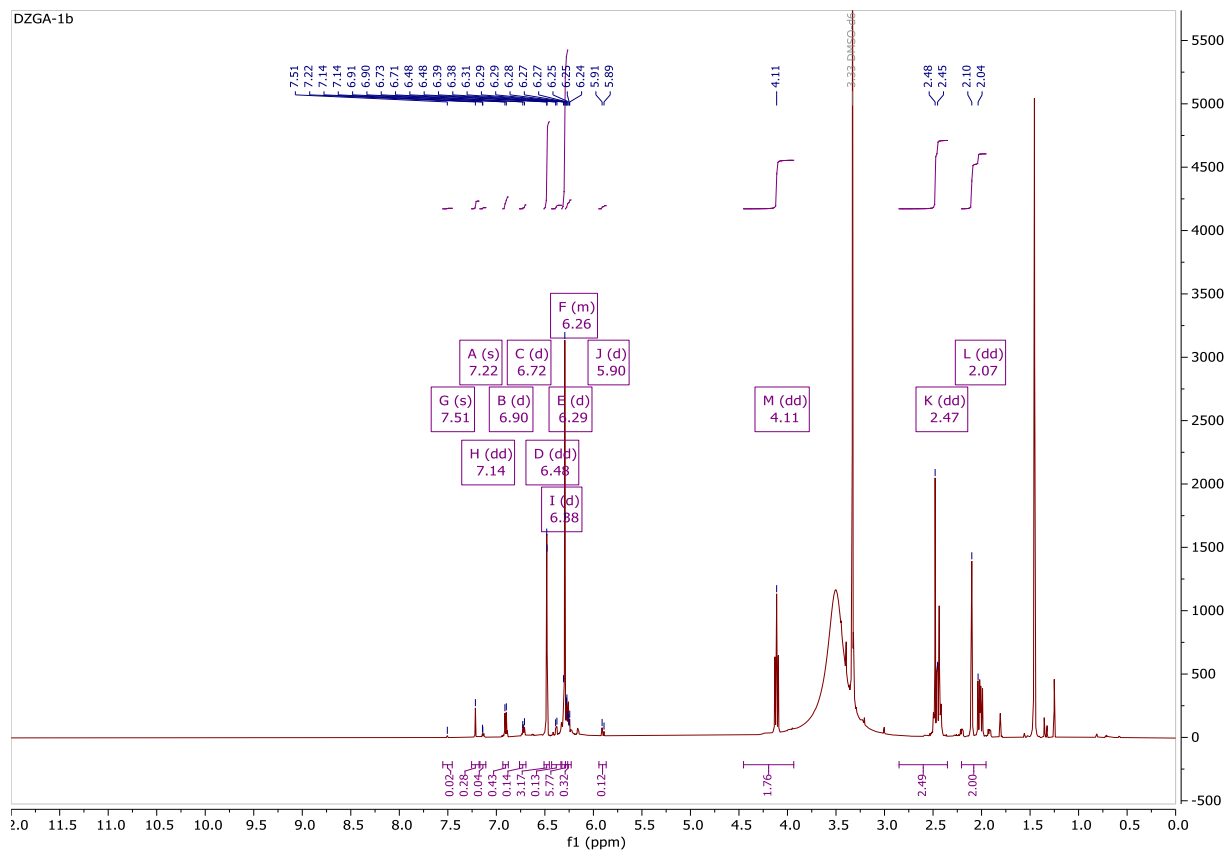

**Appendix VIb.**  $^{13}\text{C}$  -NMR spectrum (100 MHz,  $\text{DMSO-}d_6$ ) of compound **8**

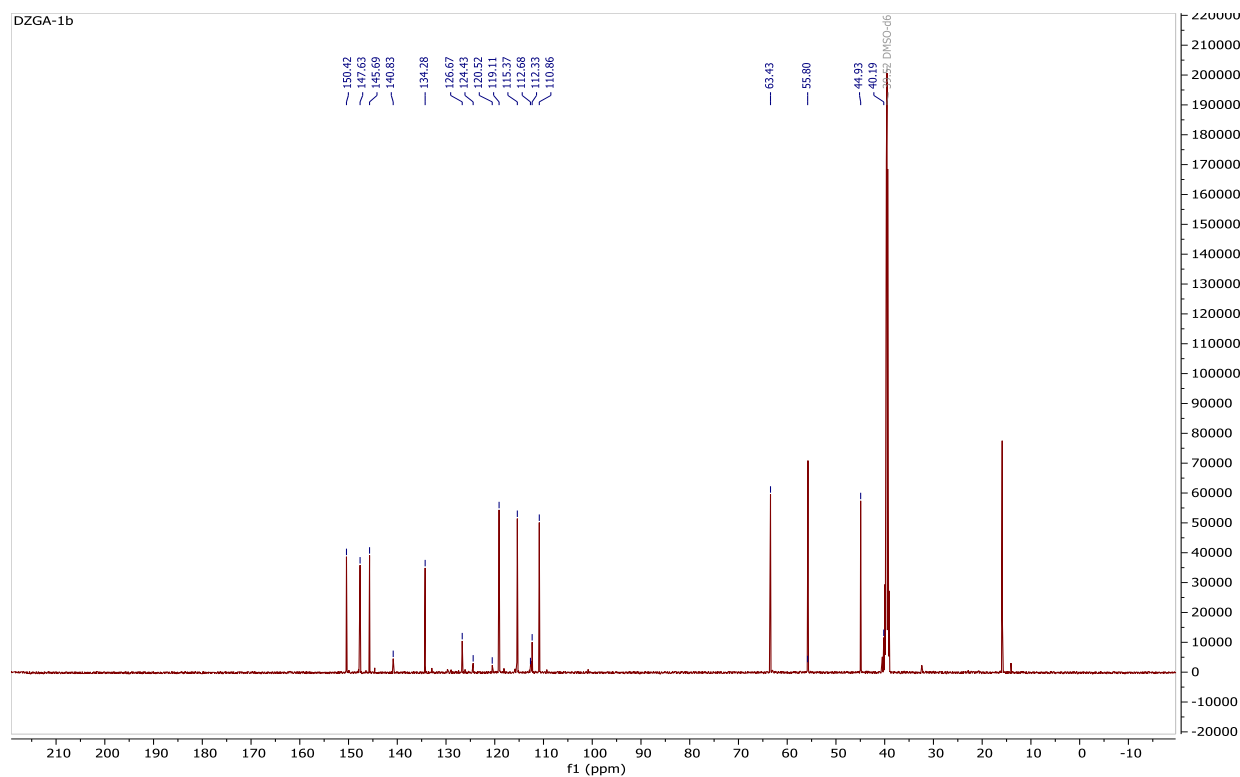

**Appendix VIc.**  $^{13}\text{C}$  -DEPT-135 NMR spectrum (100 MHz,  $\text{DMSO-}d_6$ ) of compound **8**

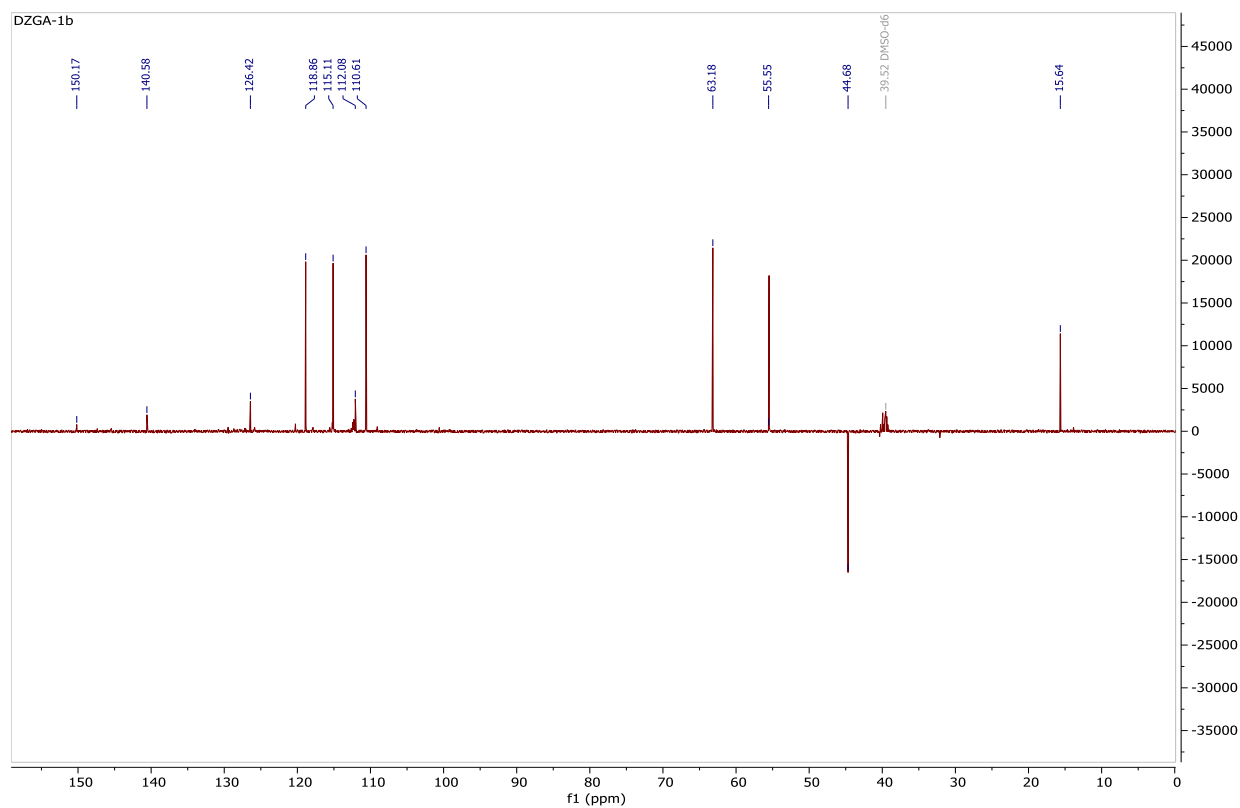

**Appendix VIIa.  $^1\text{H-NMR}$  spectrum (400 MHz,  $\text{DMSO-}d_6$ ) of compound **9****

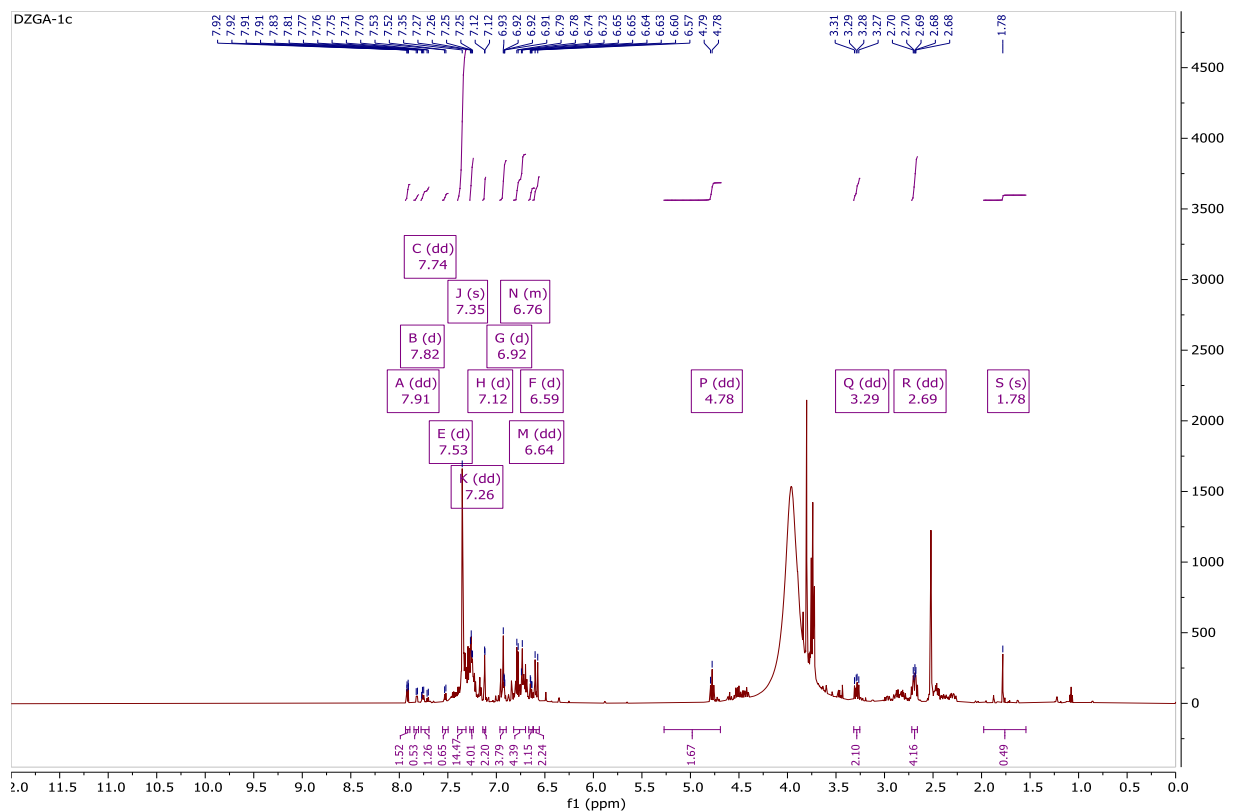

**Appendix VIIb.  $^{13}\text{C-NMR}$  spectrum (100 MHz,  $\text{DMSO-}d_6$ ) of compound **9****

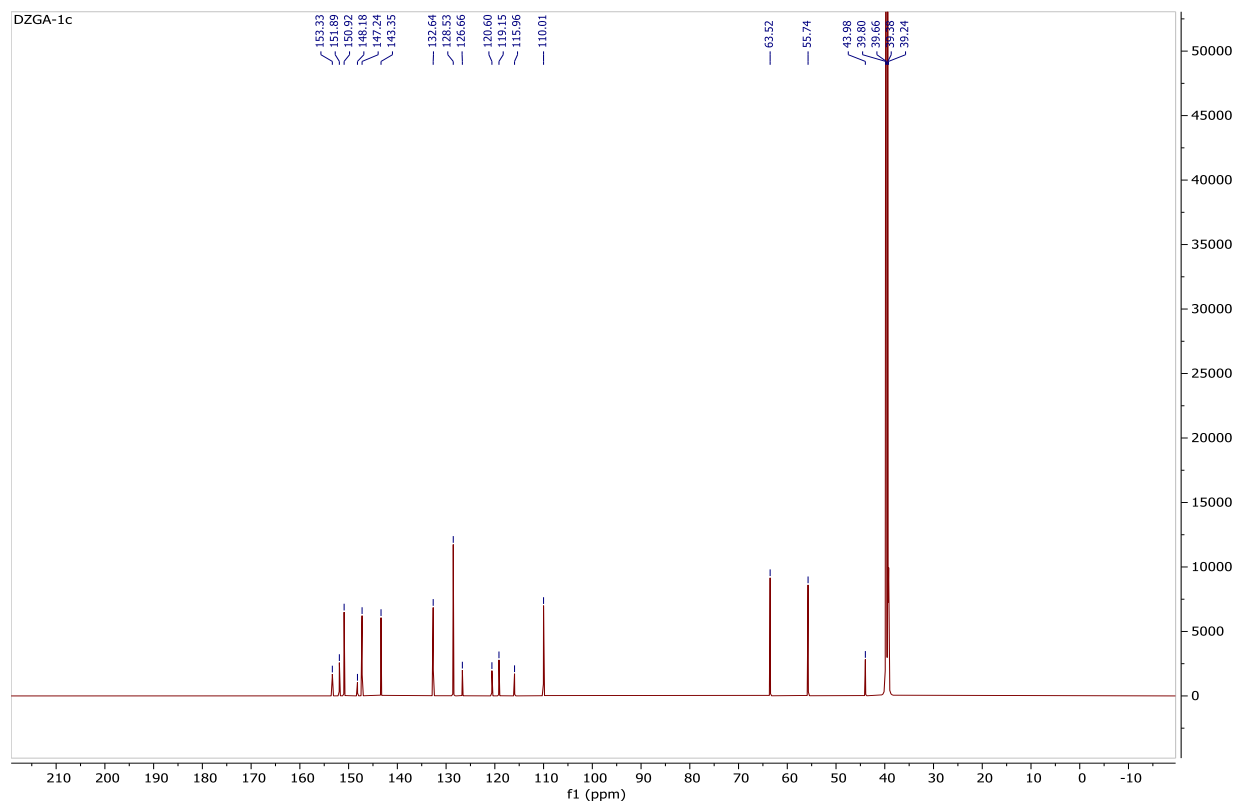

**Appendix VIIc.**  $^{13}\text{C}$  –DEPT-135 NMR spectrum (100 MHz,  $\text{DMSO-}d_6$ ) of compound **9**

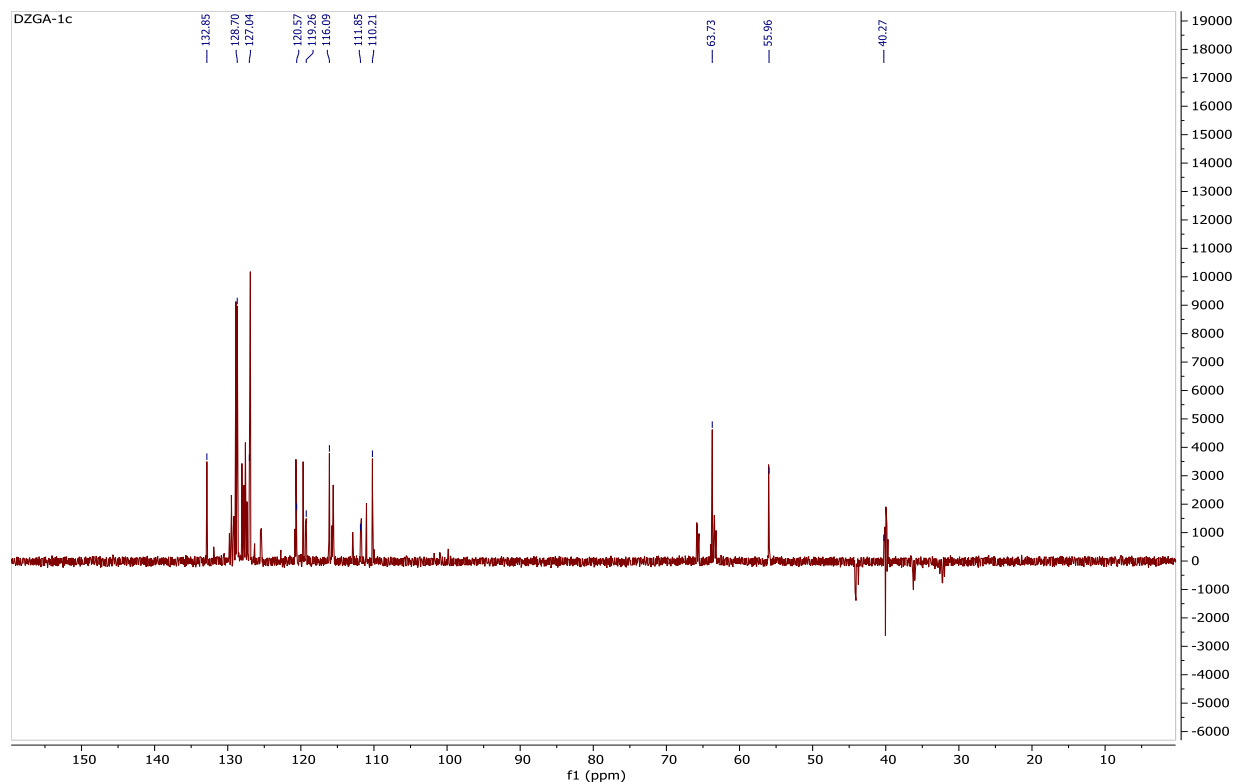

**Appendix VIIa.**  $^1\text{H}$ -NMR spectrum (400 MHz,  $\text{DMSO-}d_6$ ) of compound **10**

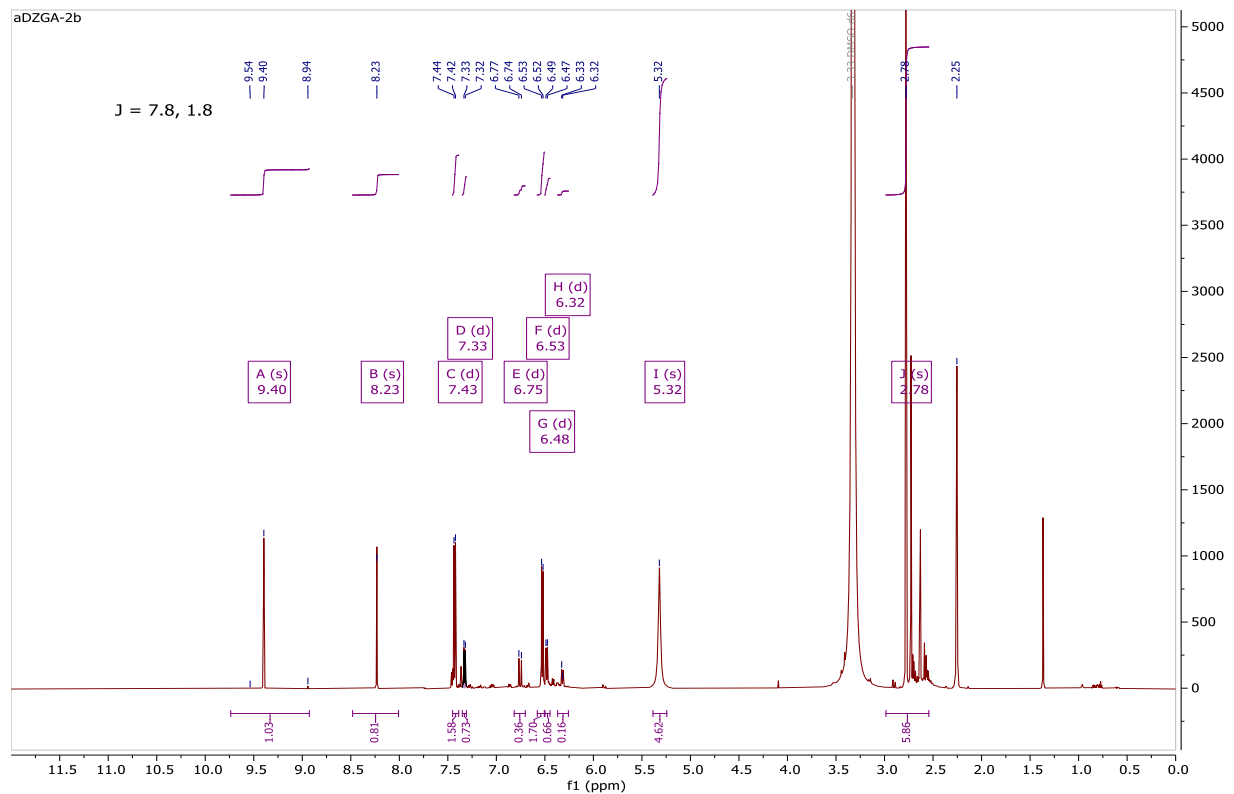

**Appendix VIIIb.**  $^{13}\text{C}$  -NMR spectrum (100 MHz,  $\text{DMSO-}d_6$ ) of compound **10**

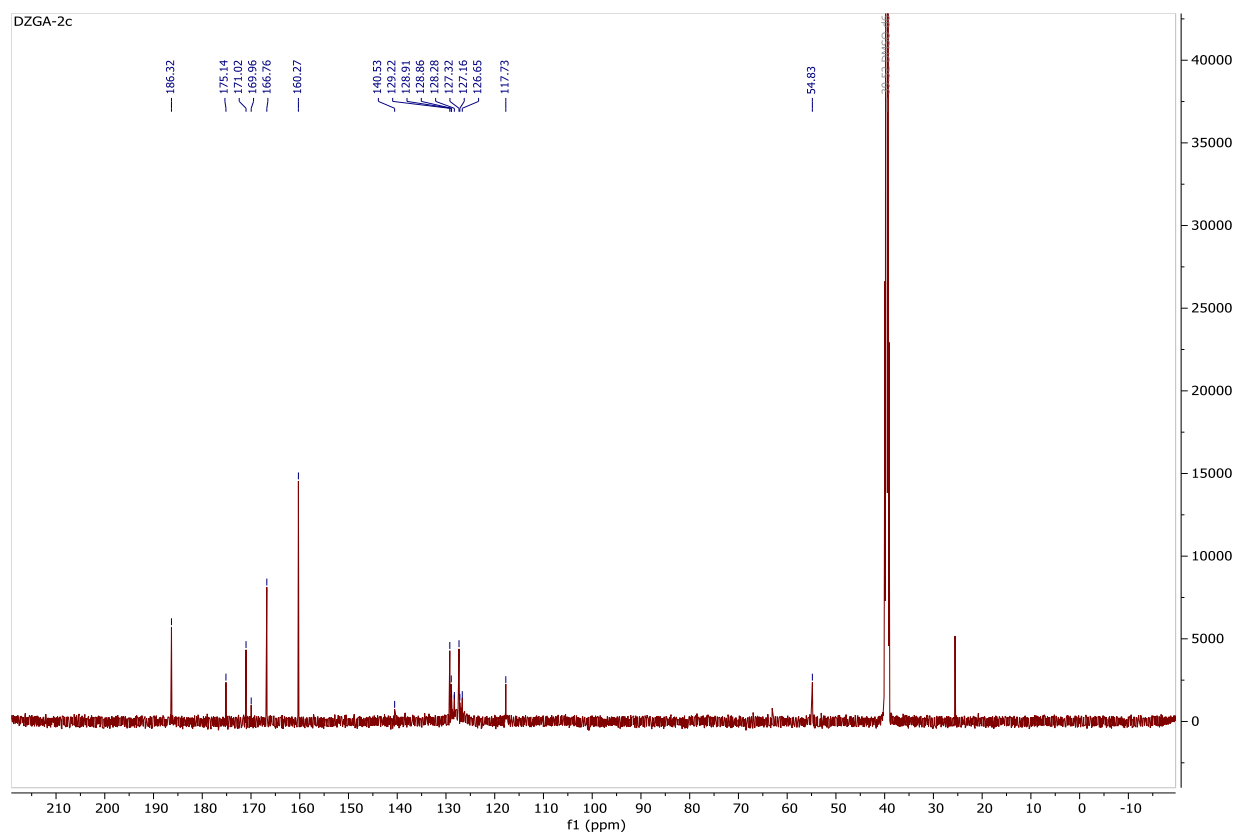

**Appendix VIIIc.**  $^{13}\text{C}$  -DEPT-135 NMR spectrum (100 MHz,  $\text{DMSO-}d_6$ ) of compound **10**

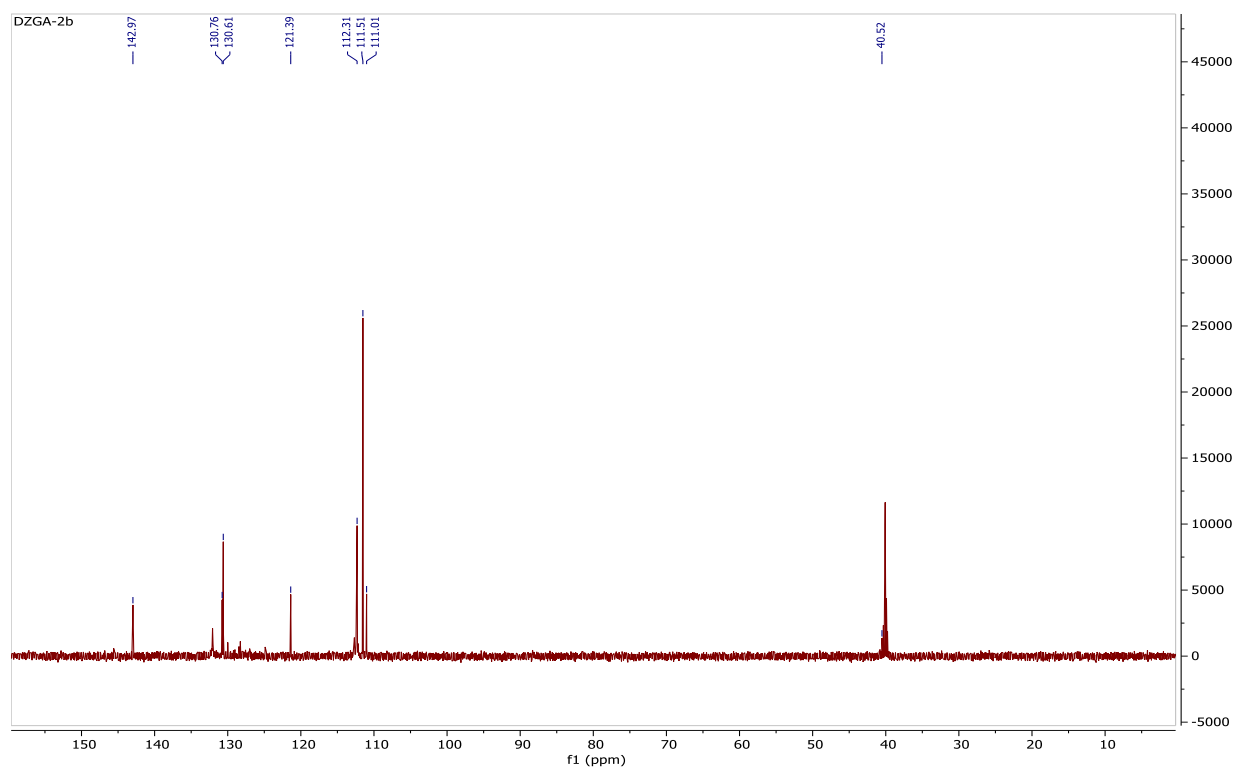

### Appendix IXa. $^1\text{H}$ -NMR spectrum (400 MHz, $\text{DMSO-}d_6$ ) of compound **11**

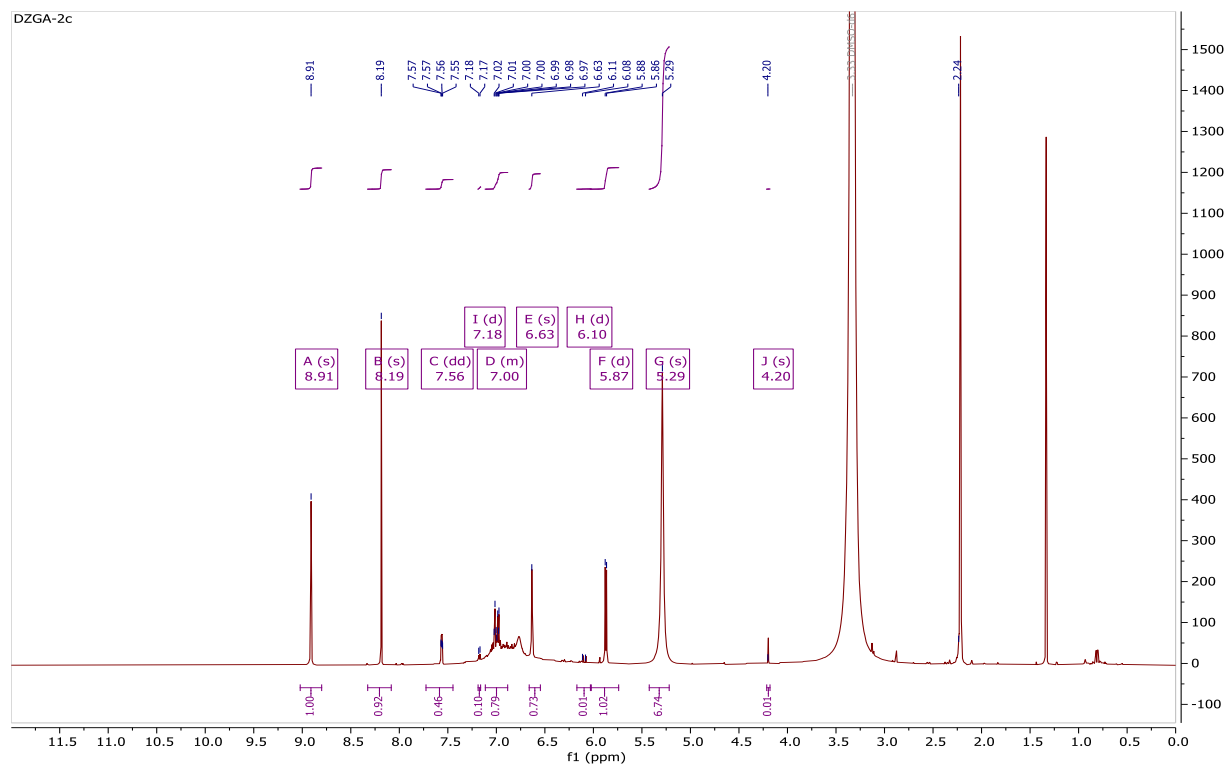

### Appendix IXb. $^{13}\text{C}$ -NMR spectrum (100 MHz, $\text{DMSO-}d_6$ ) of compound **11**

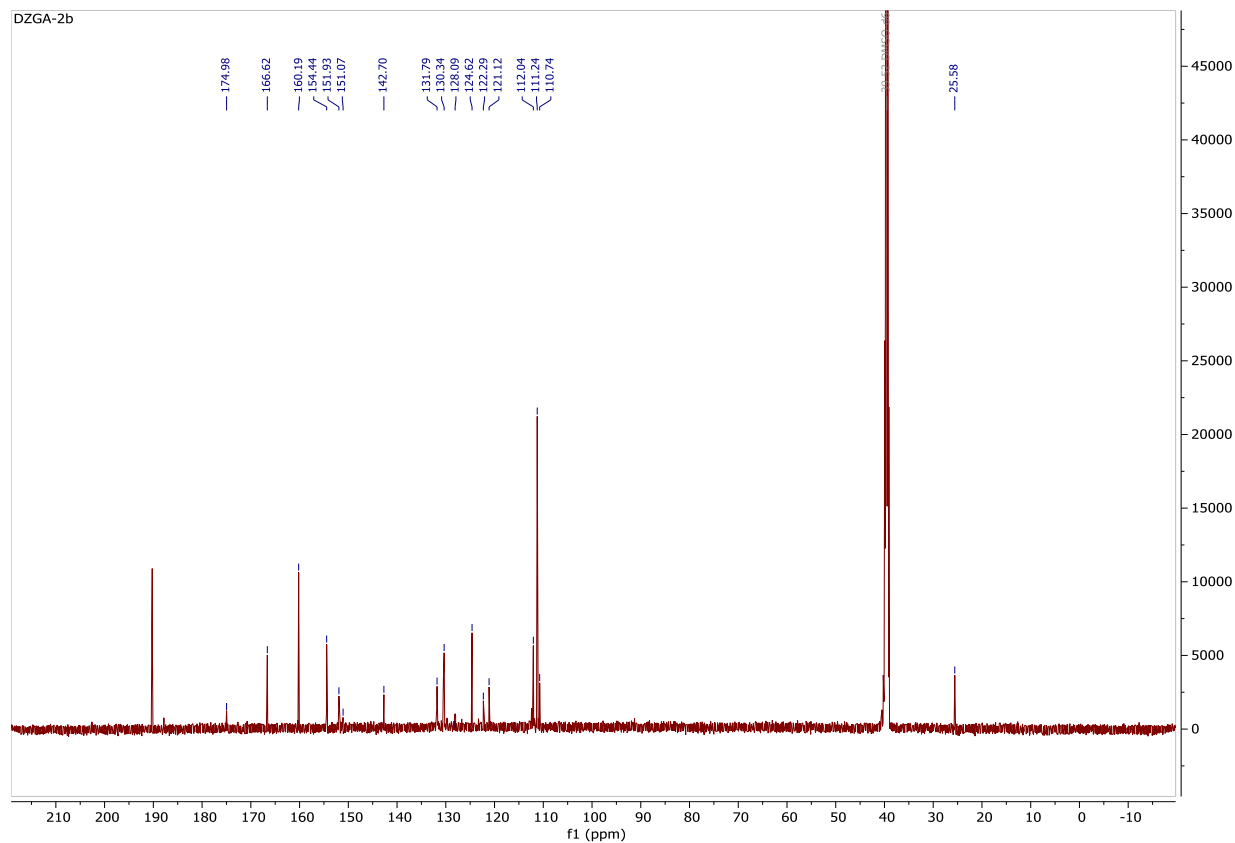

**Appendix IXc.**  $^{13}\text{C}$  –DEPT-135 NMR spectrum (100 MHz,  $\text{DMSO-}d_6$ ) of compound **11**

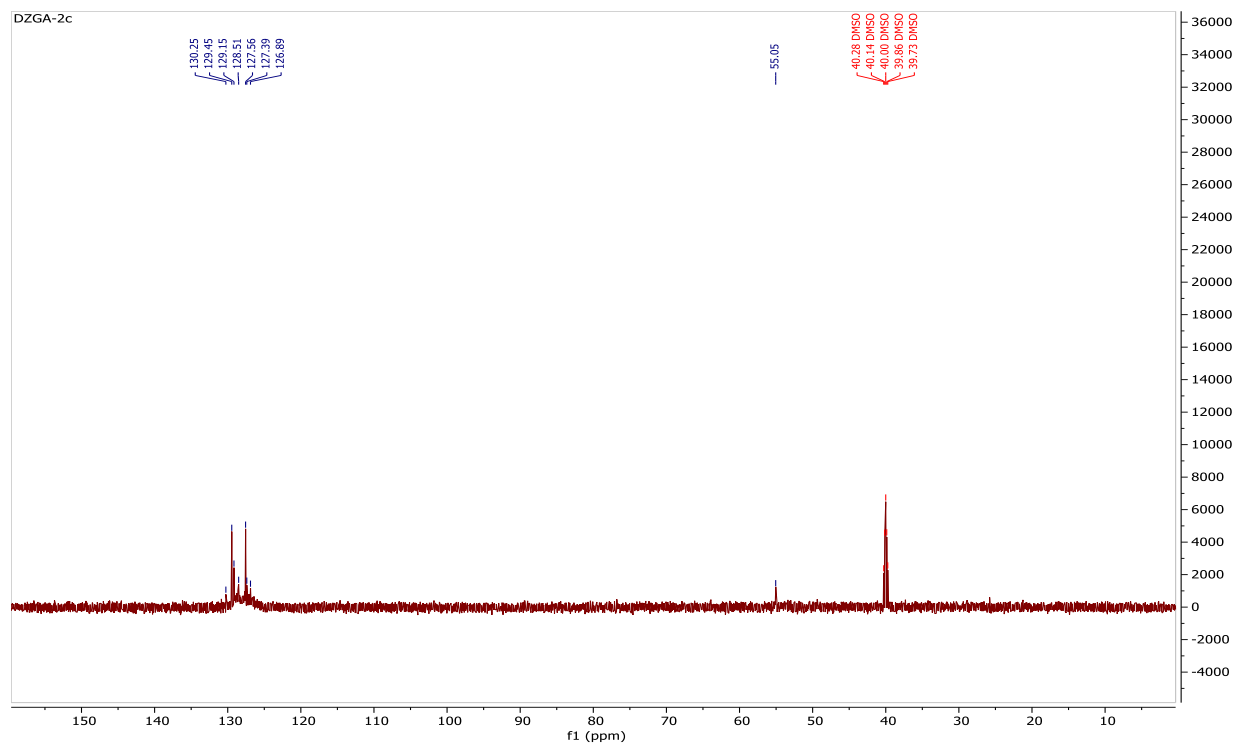

**Appendix Xa.**  $^1\text{H}$ -NMR spectrum (400 MHz,  $\text{DMSO-}d_6$ ) of compound **12**

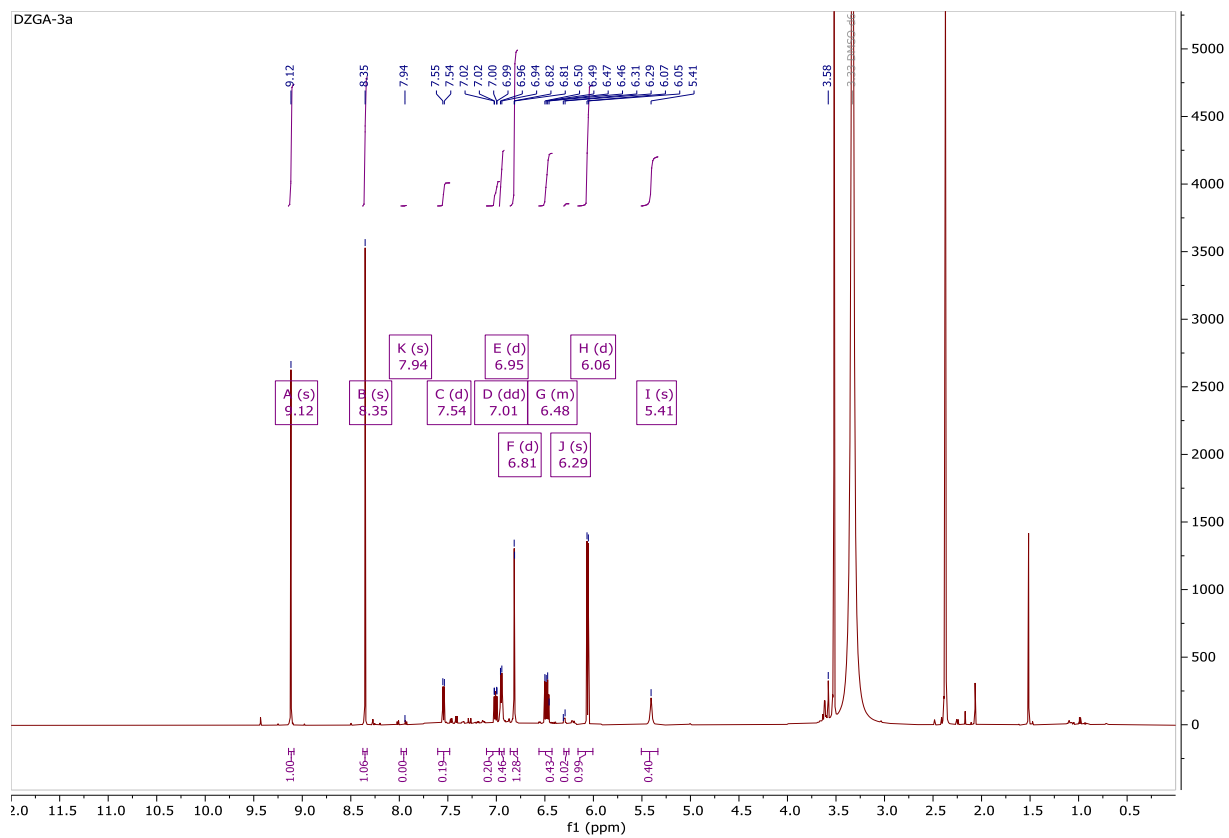

### Appendix Xb. $^{13}\text{C}$ -NMR spectrum (100 MHz, $\text{DMSO-}d_6$ ) of compound **12**

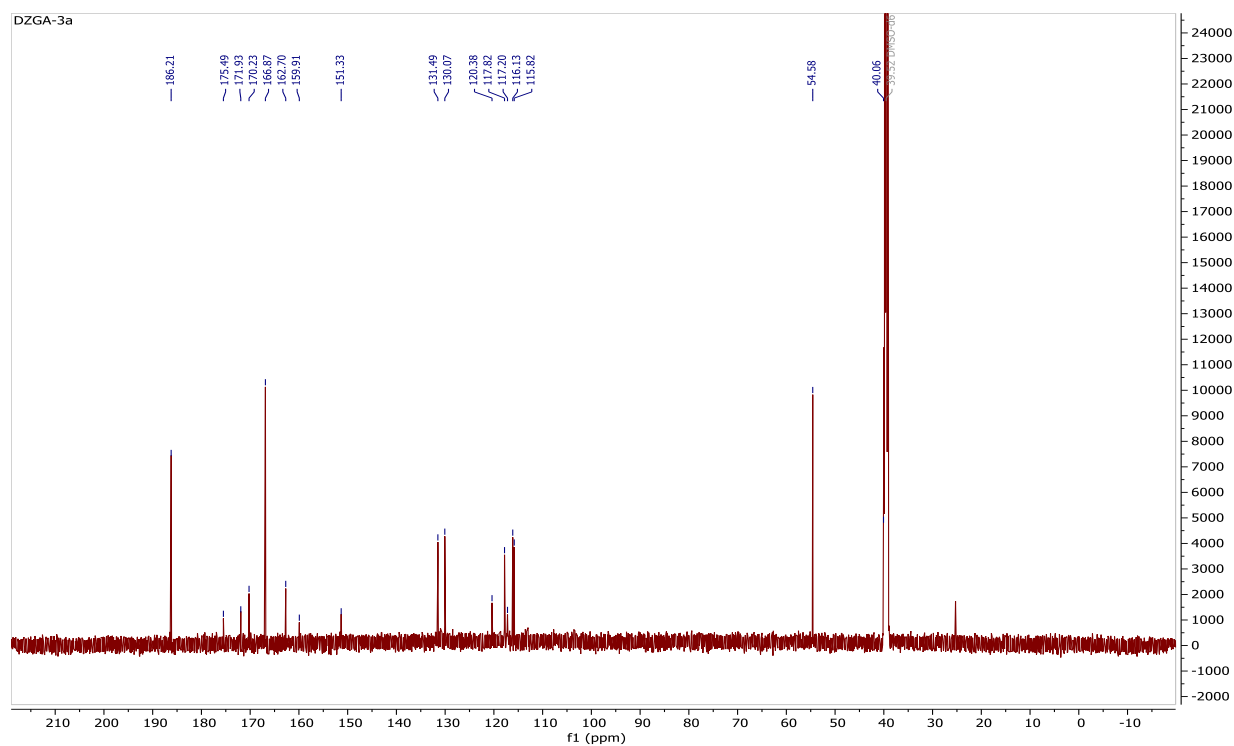

### Appendix Xc. $^{13}\text{C}$ -DEPT-135 NMR spectrum (100 MHz, $\text{DMSO-}d_6$ ) of compound **12**

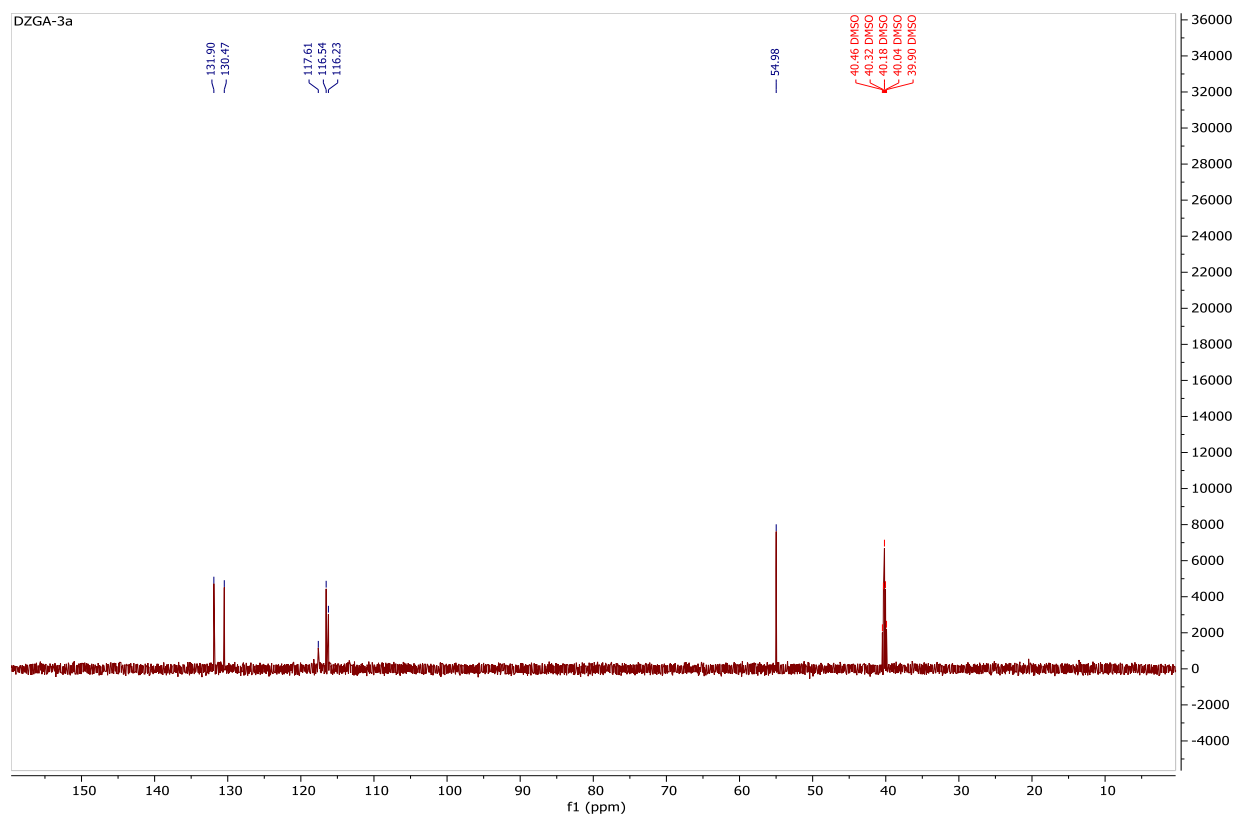



**Appendix XIa.**  $^1\text{H-NMR}$  spectrum (400 MHz,  $\text{DMSO-}d_6$ ) of compound **13**

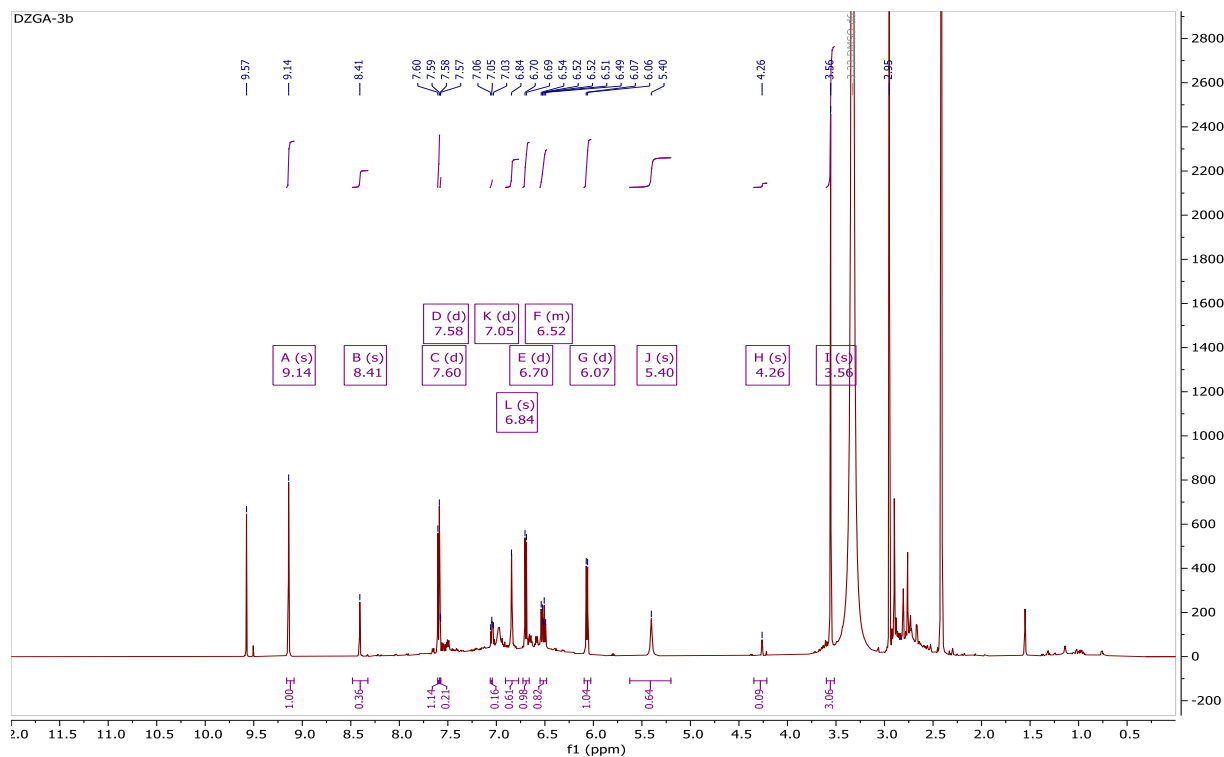

**Appendix XIb.**  $^{13}\text{C-NMR}$  spectrum (100 MHz,  $\text{DMSO-}d_6$ ) of compound **13**

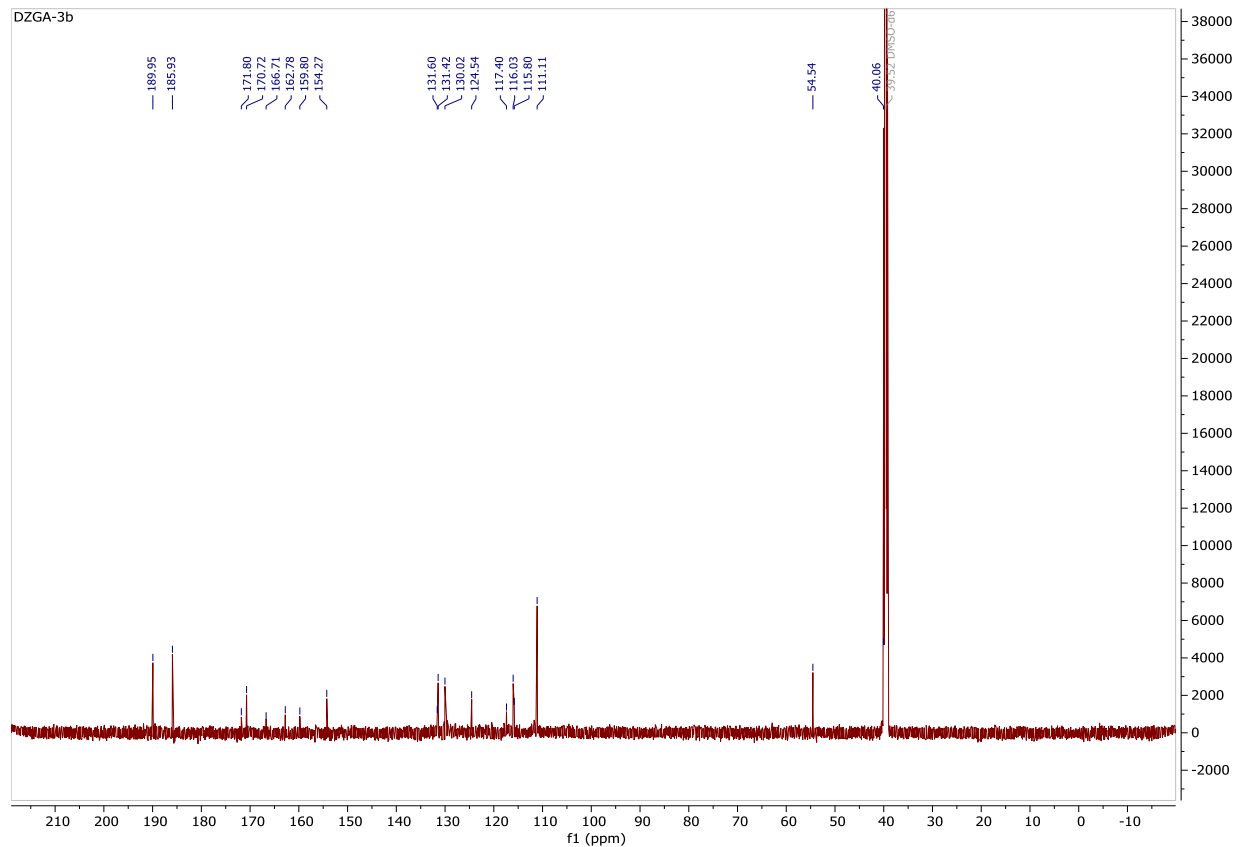

**Appendix XIc.**  $^{13}\text{C}$  –DEPT-135 NMR spectrum (100 MHz,  $\text{DMSO-}d_6$ ) of compound **13**

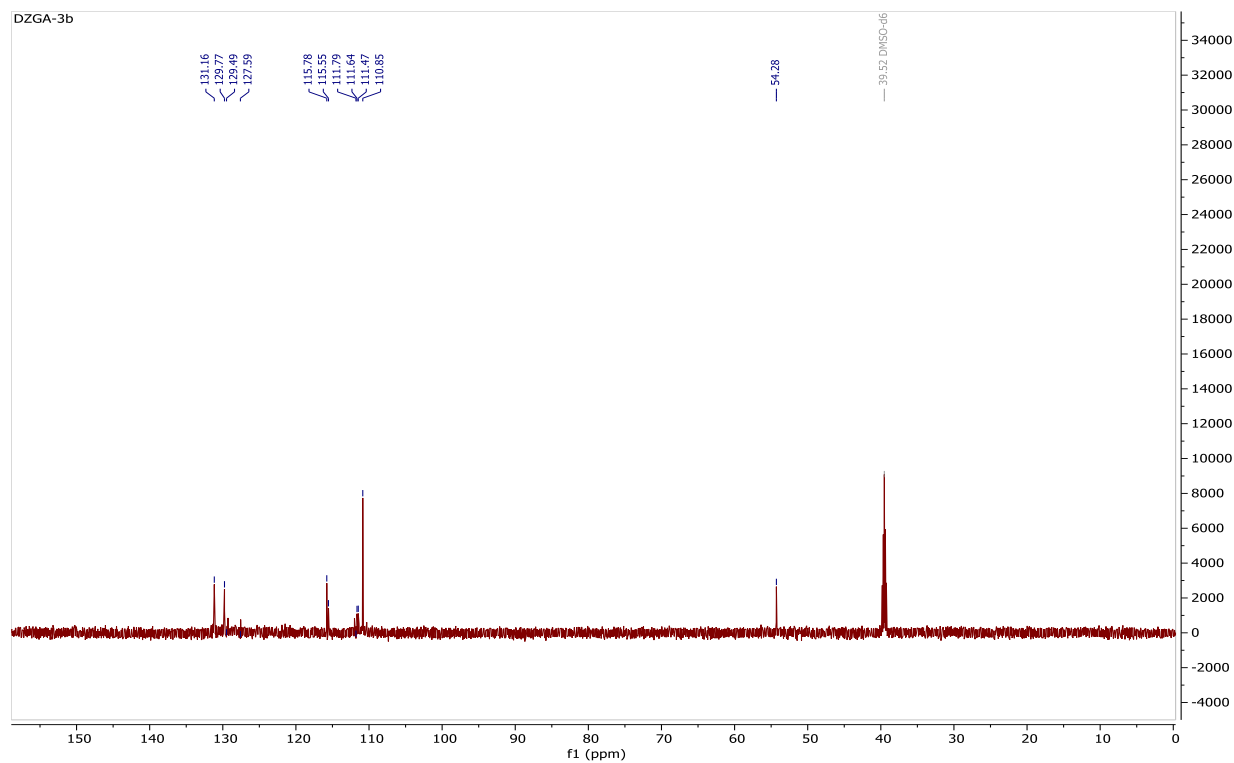

**Appendix XIIa.**  $^1\text{H}$ -NMR spectrum (400 MHz,  $\text{DMSO-}d_6$ ) of compound **14**

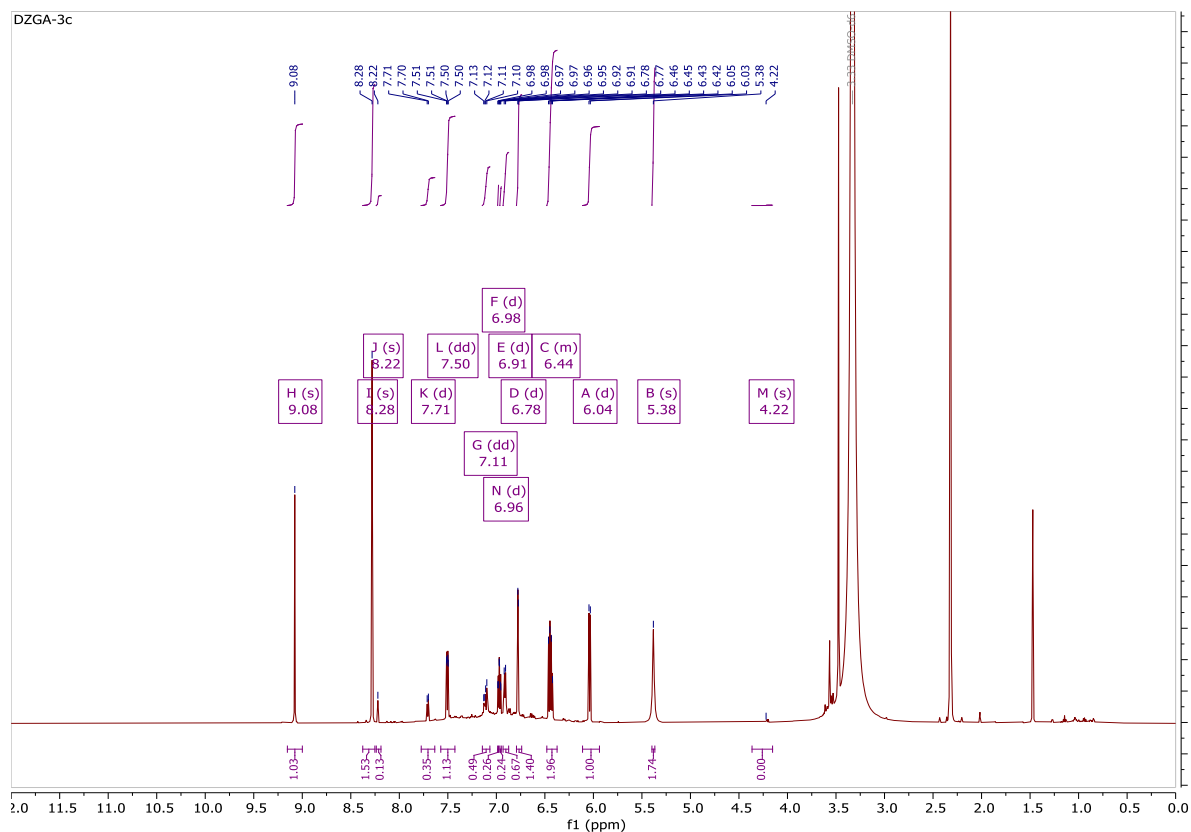

**Appendix XIb.**  $^{13}\text{C}$ -NMR spectrum (100 MHz,  $\text{DMSO-}d_6$ ) of compound **14**

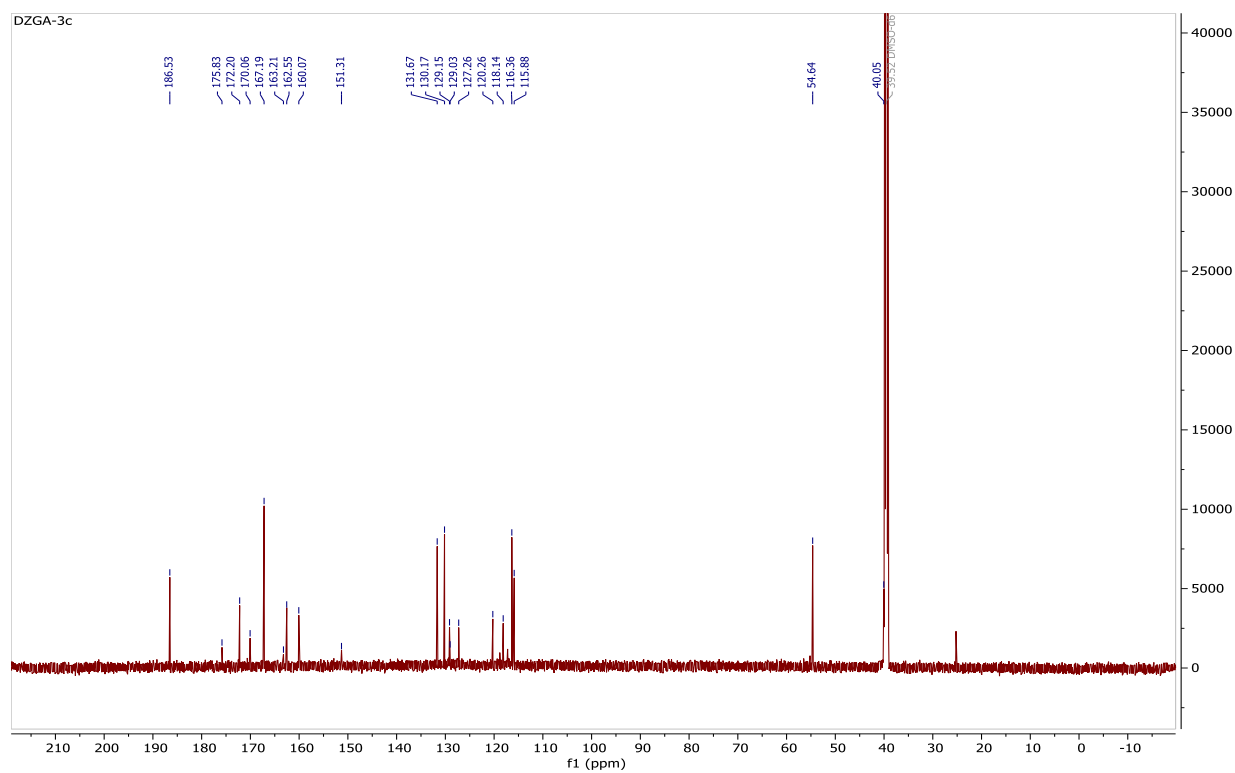

**Appendix XIc.**  $^{13}\text{C}$ -DEPT-135 NMR spectrum (100 MHz,  $\text{DMSO-}d_6$ ) of compound **14**

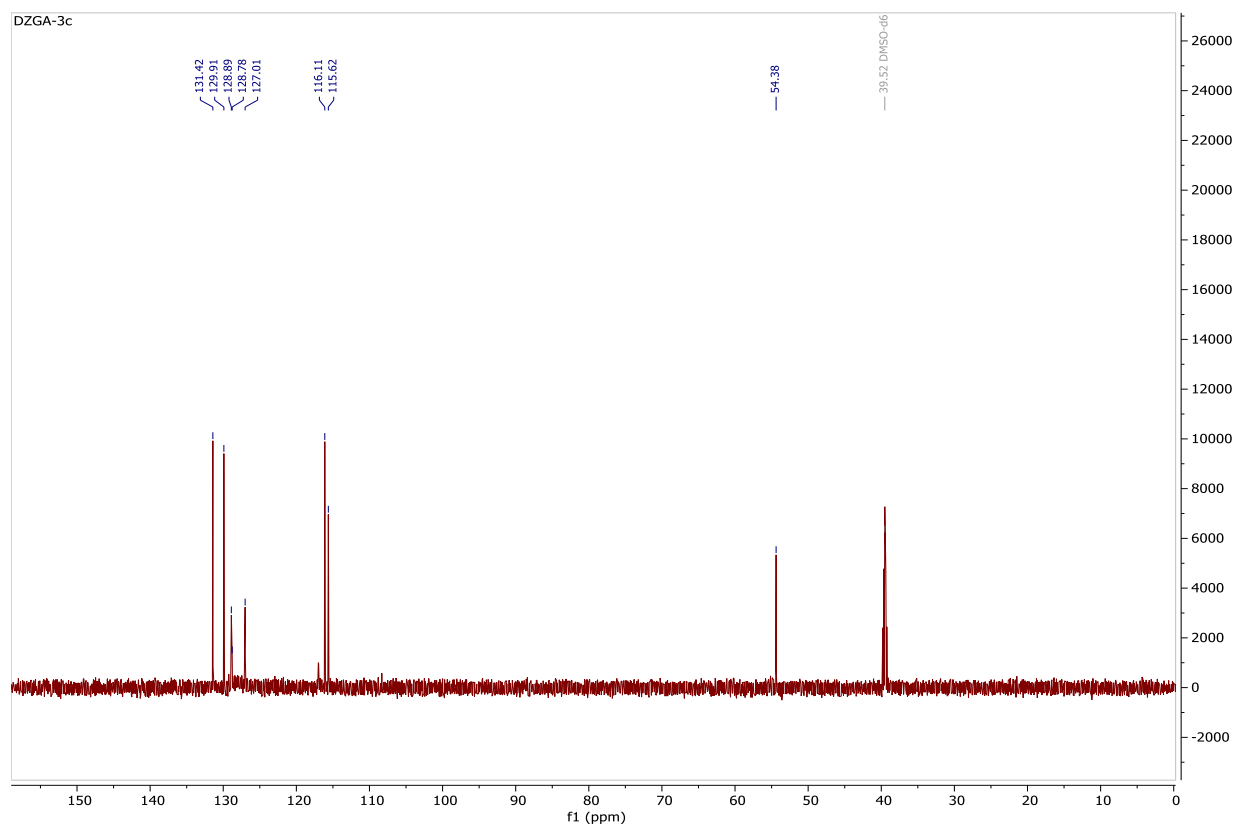

**Appendix XIIIa.**  $^1\text{H-NMR}$  spectrum (400 MHz,  $\text{DMSO-}d_6$ ) of compound **15**

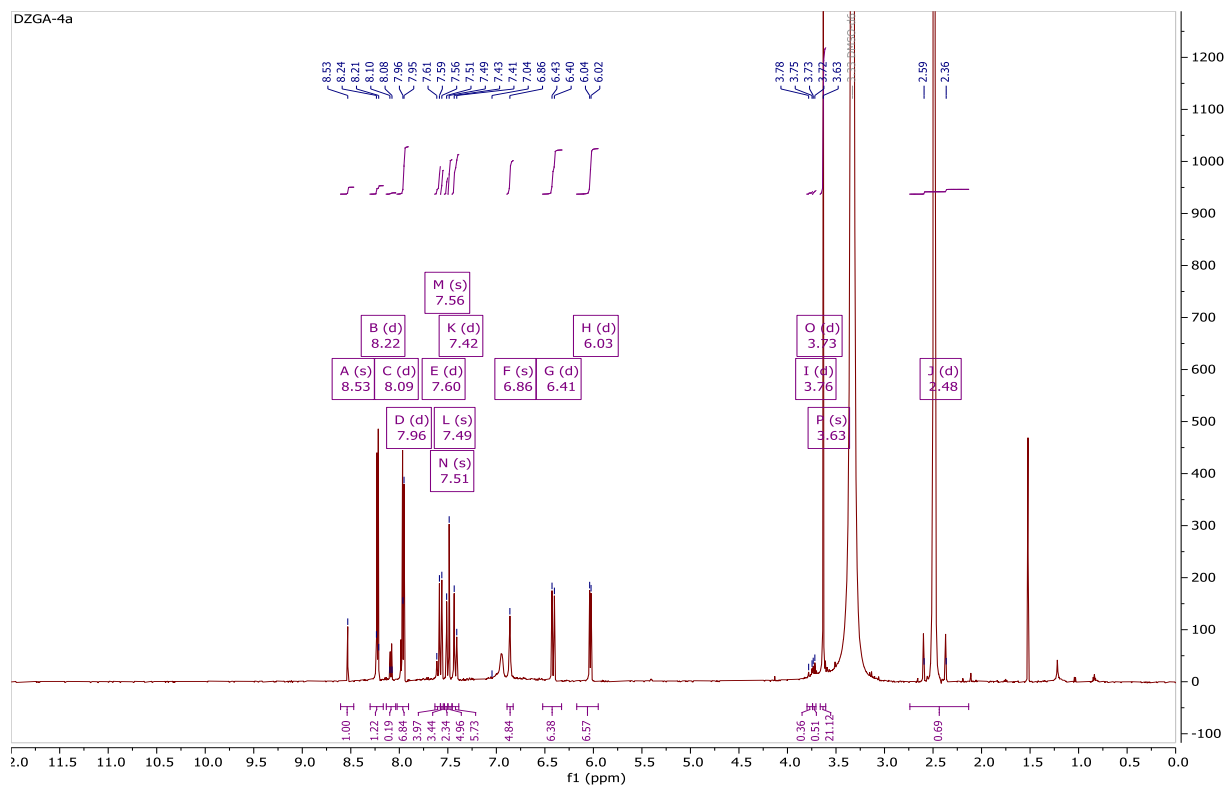

**Appendix XIIIb.**  $^{13}\text{C-NMR}$  spectrum (100 MHz,  $\text{DMSO-}d_6$ ) of compound **15**

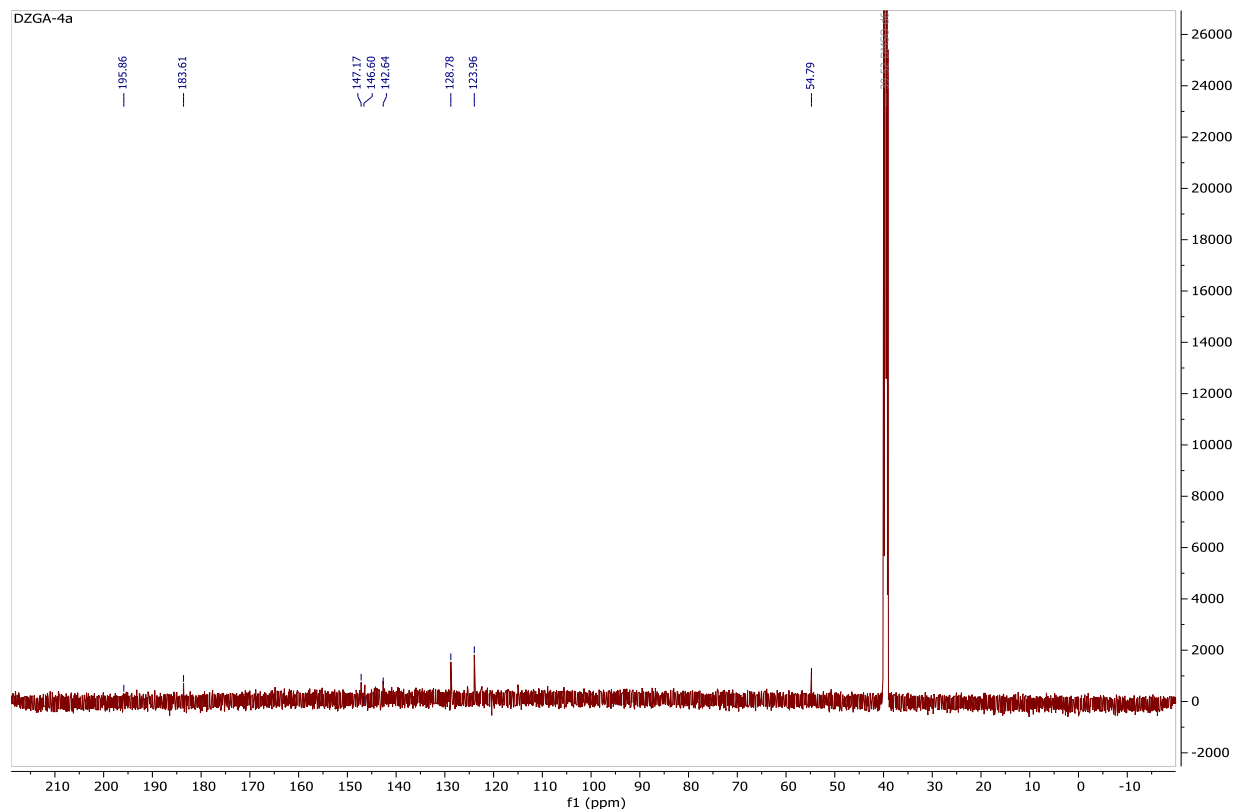

**Appendix XIIIc.**  $^{13}\text{C}$  –DEPT-135 NMR spectrum (100 MHz,  $\text{DMSO-}d_6$ ) of compound **15**

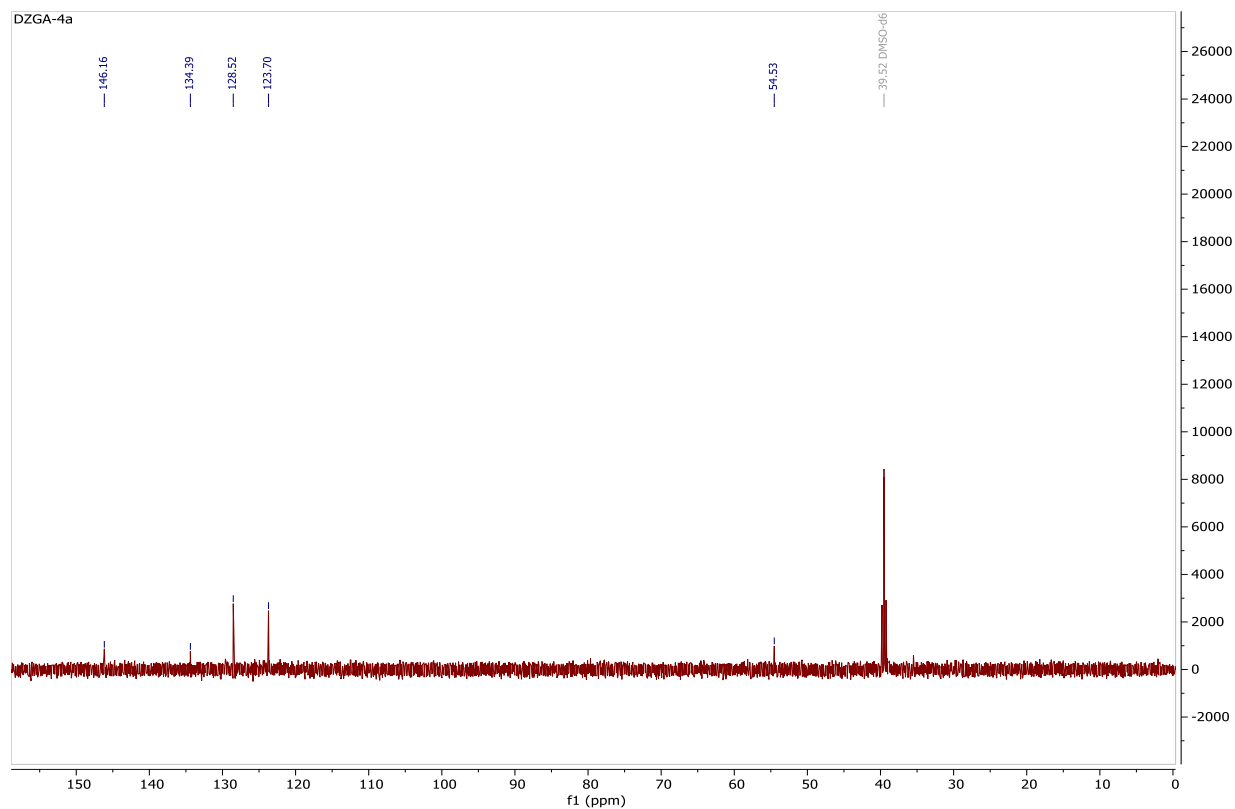

**Appendix XIVa.**  $^1\text{H}$ -NMR spectrum (400 MHz,  $\text{DMSO-}d_6$ ) of compound **16**

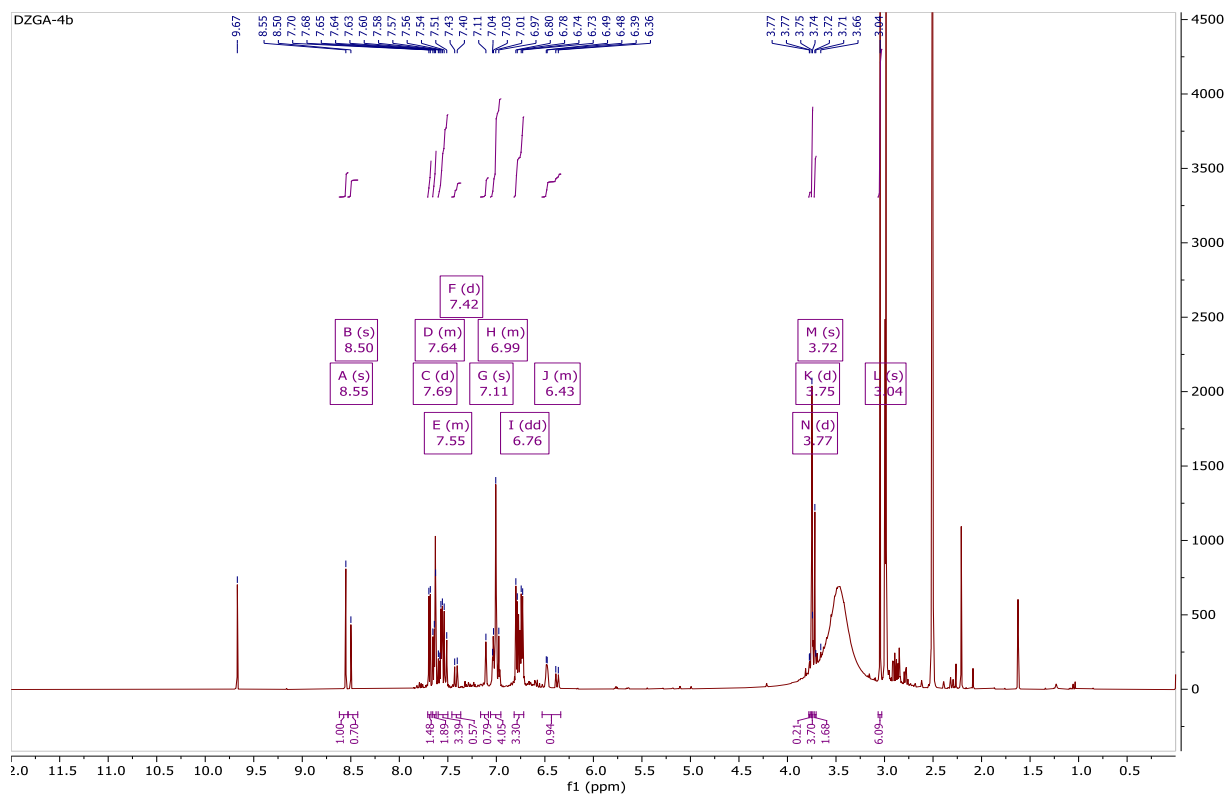

### Appendix XIVb. $^{13}\text{C}$ -NMR spectrum (100 MHz, $\text{DMSO-}d_6$ ) of compound **16**

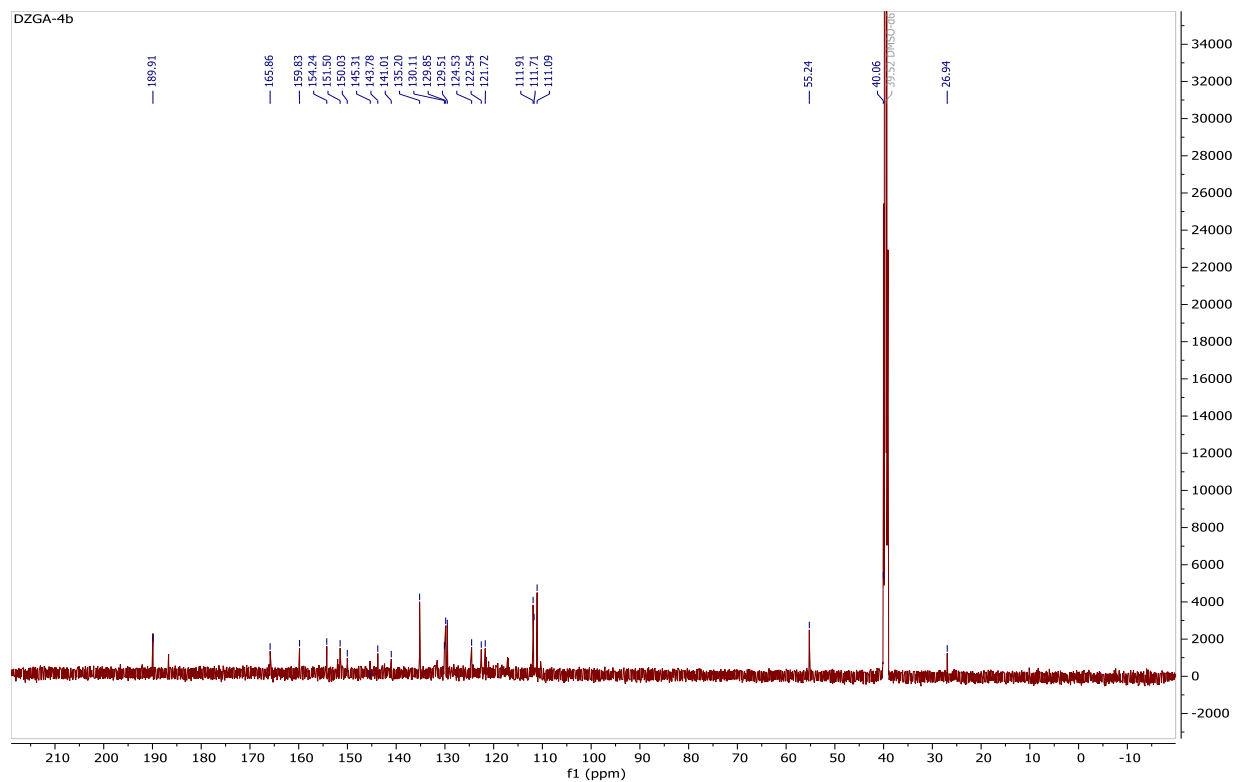

### Appendix XIVc. $^{13}\text{C}$ -DEPT-135 NMR spectrum (100 MHz, $\text{DMSO-}d_6$ ) of compound **16**

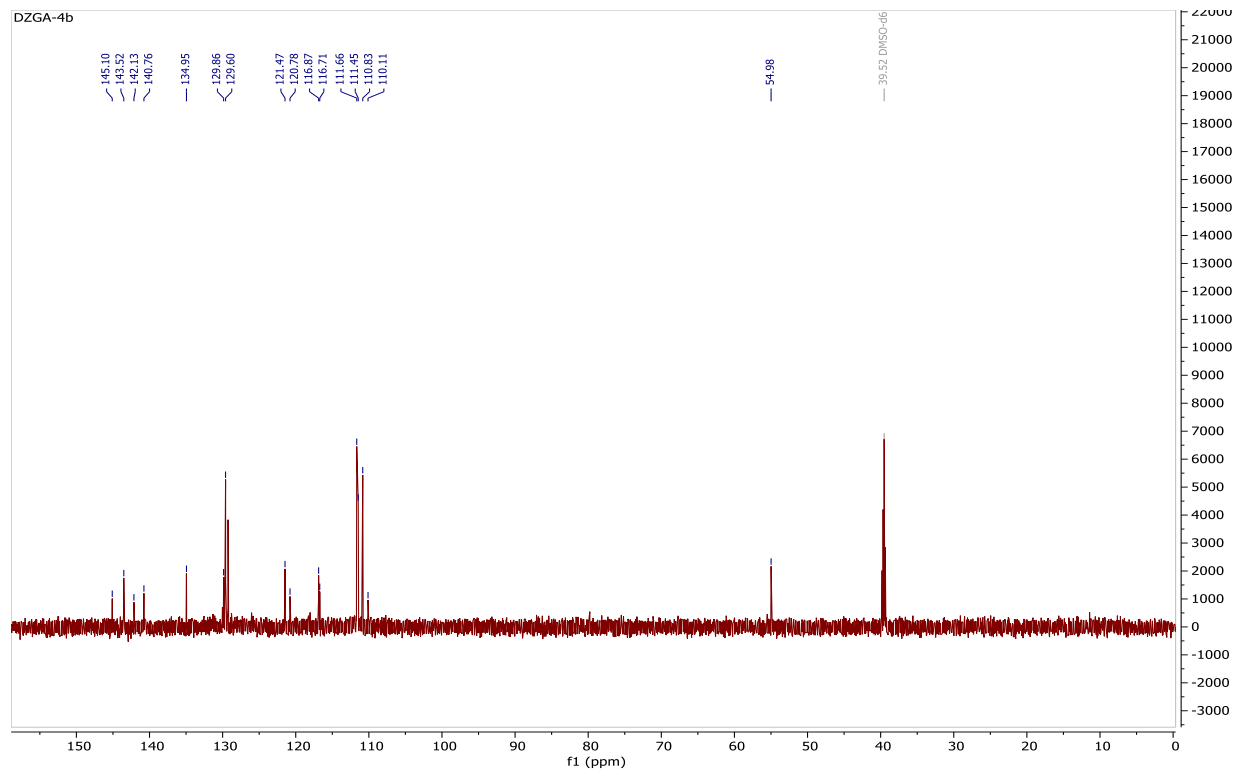

**Appendix XV.** Synthesized monocarbonyl curcumin analogs derived from dehydrozingerone (3-7)

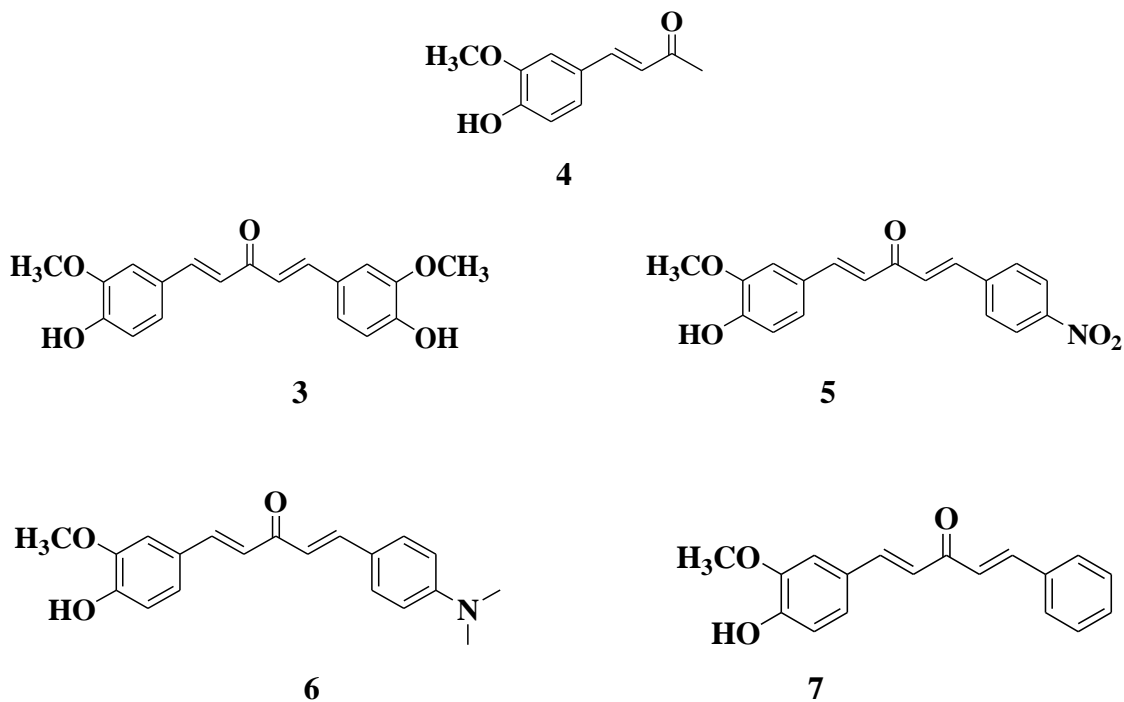

**Appendix XVI.** Synthesized of *N*-pyrazolines, **8** and **9**, 4-phenyl-6-styrylpyrimidine-2-ol, **11** and **12**, thiazolo[3,2- $\alpha$ ] pyrimidines, **12-14**, and  $\beta$ -substituted imidazoles, **15** and **16**, derived from curcuminoid analogs using ultrasonic irradiation assisted condition

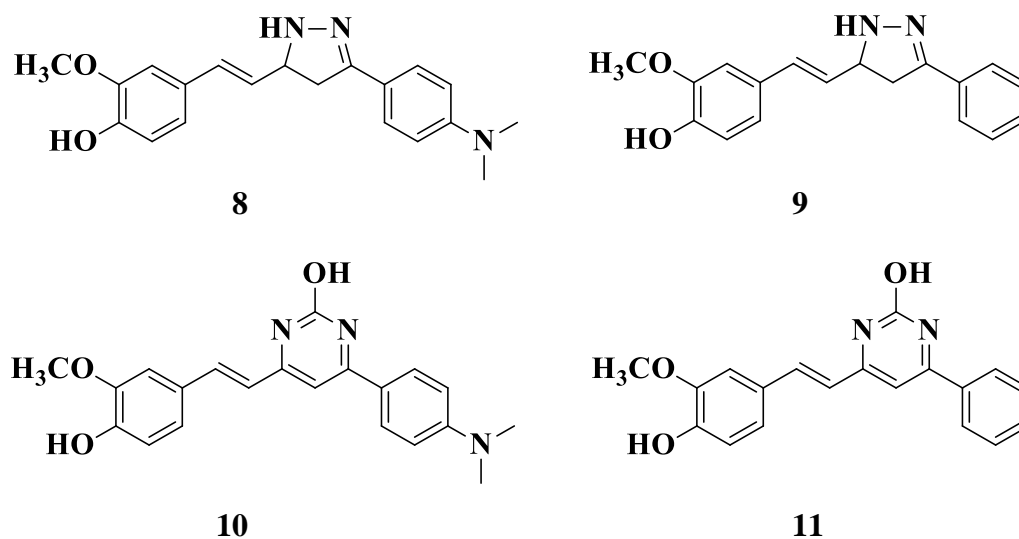

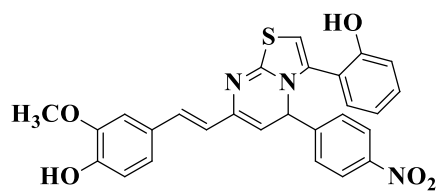

12

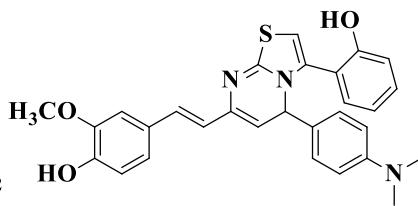

13

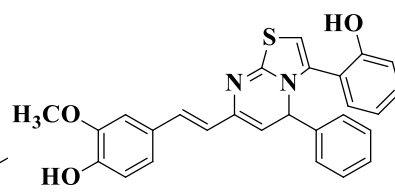

14

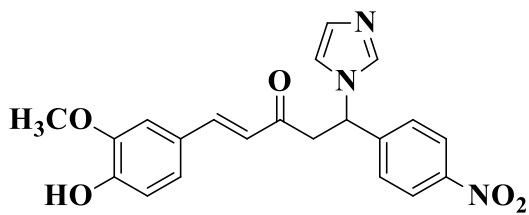

15

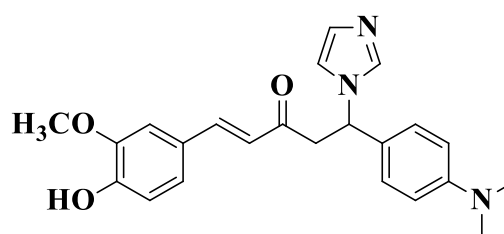

16



**Appendix XVII.** *In vitro* antibacterial activity of heterocyclics curcuminoid analogs (**8-16**) against pathological strains expressed as the diameter of inhibition zones in millimeters (unit, mm) based on agar well diffusion assay compared to a positive control (amoxicillin) and negative control (DMSO), results given in  $\mu\text{g/mL}$  sample

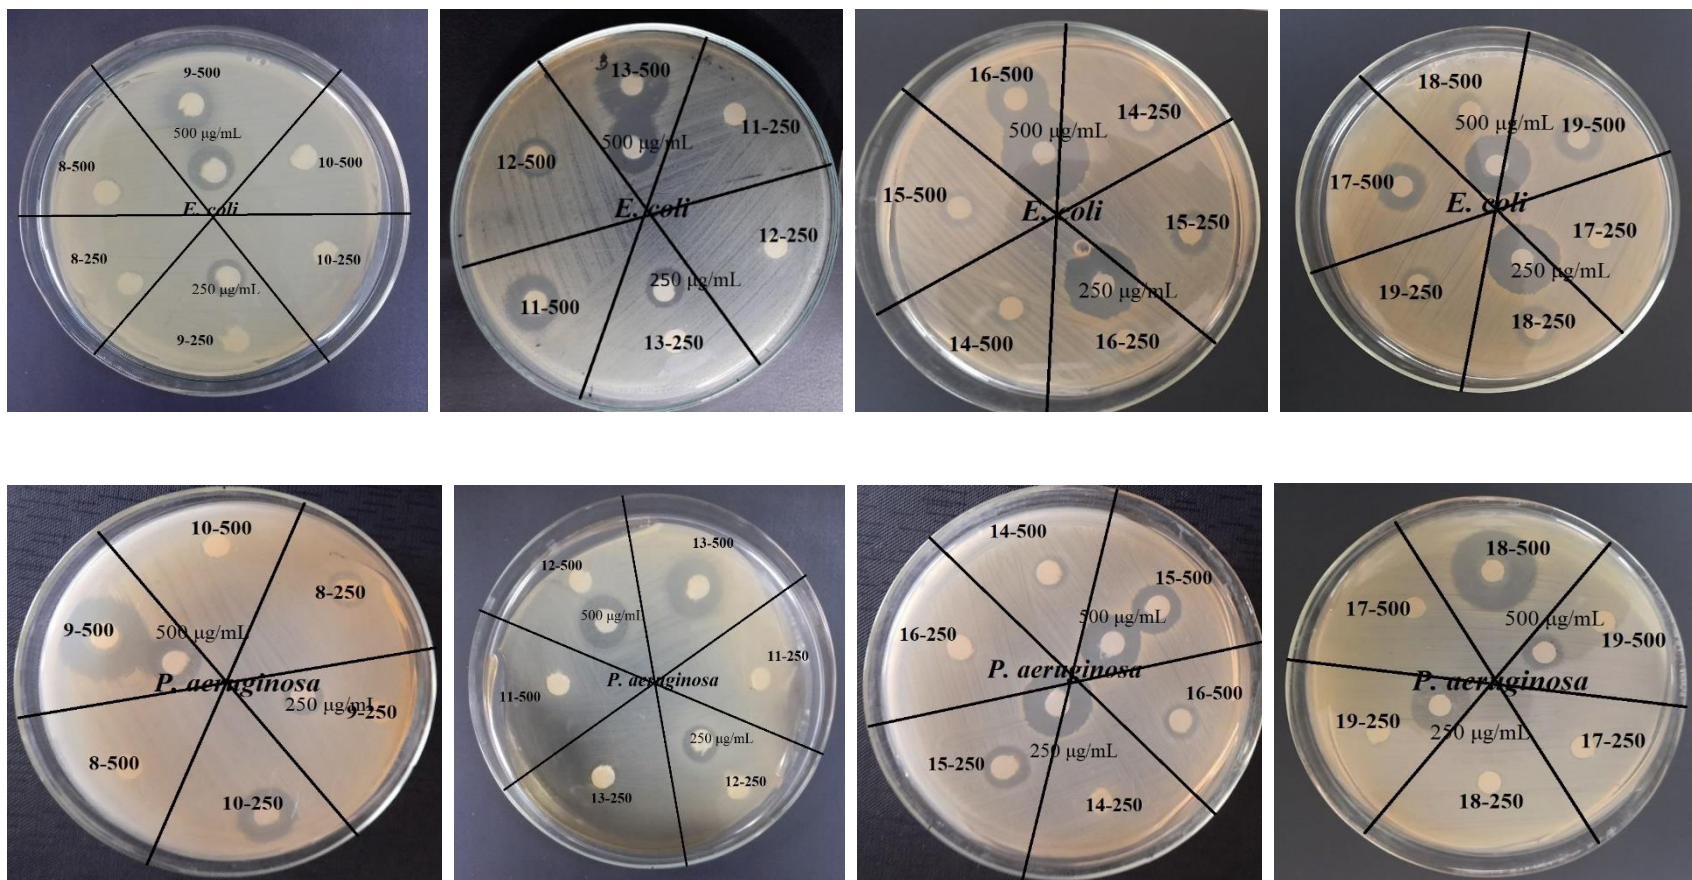

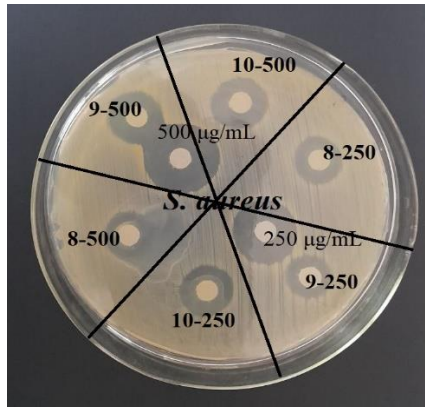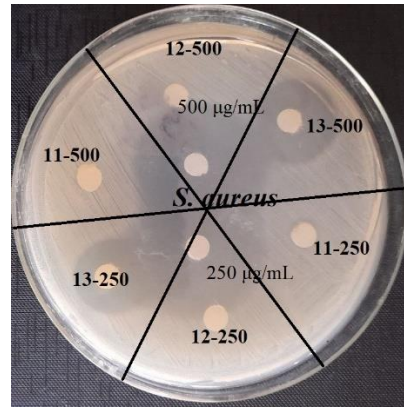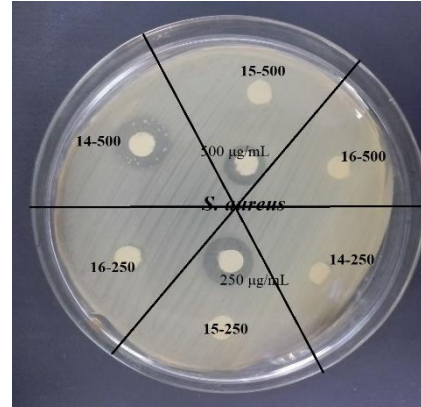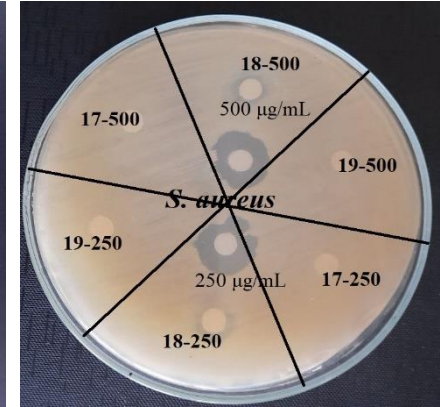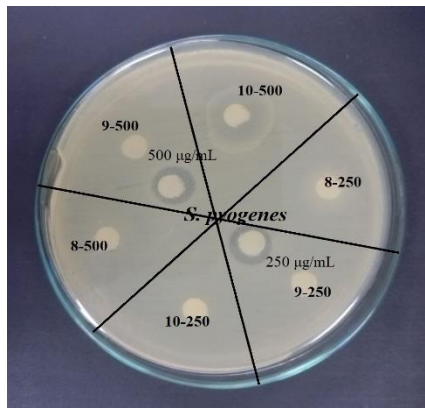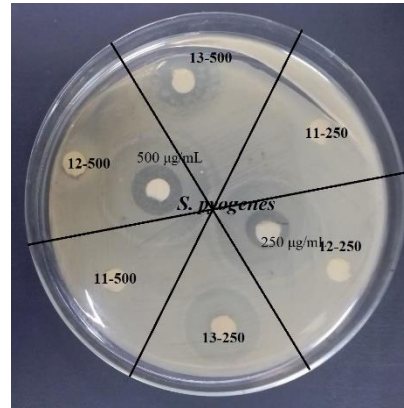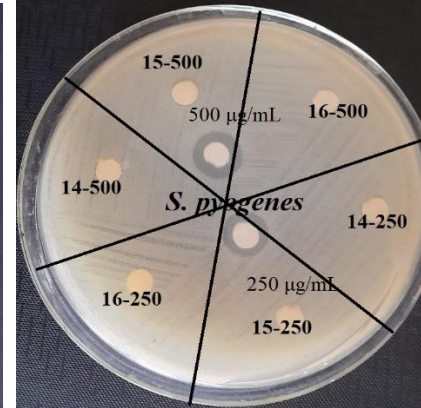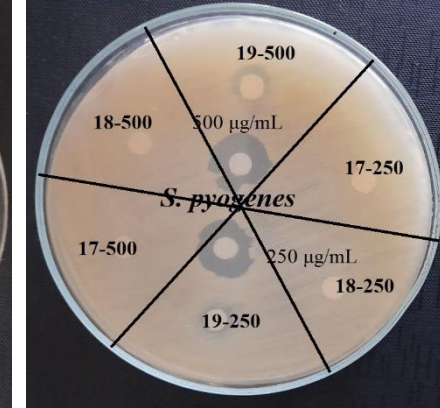

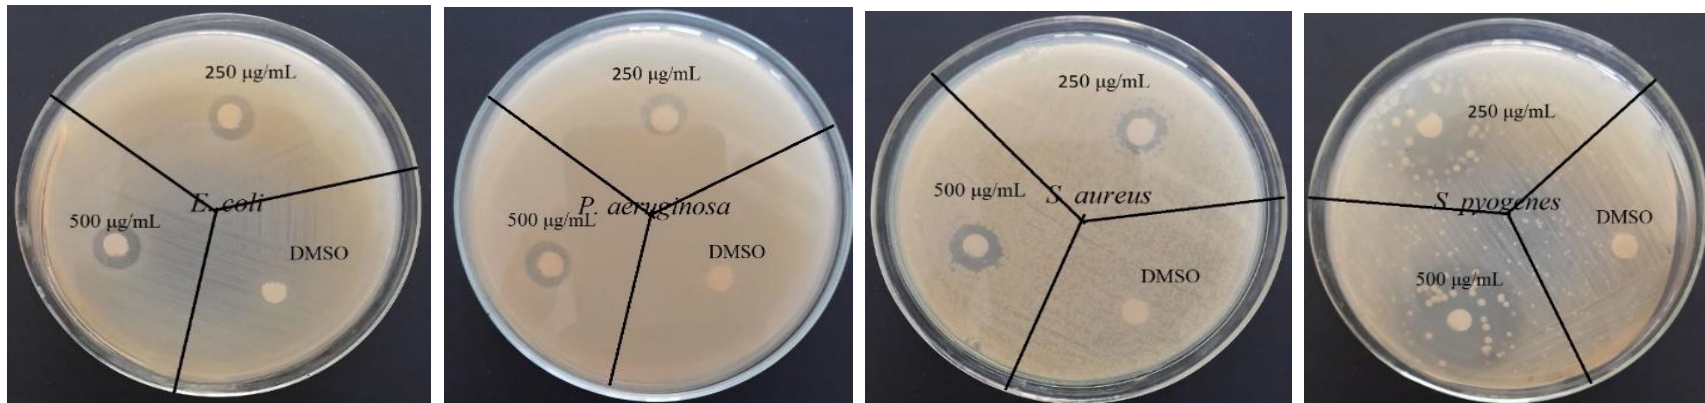

**N.B.** Gram-negative bacteria, *Escherichia coli* (ATCC 25922) and *Pseudomonas aeruginosa* (ATCC 27853) and Gram-positive bacteria, *Staphylococcus aureus* (ATCC 25923) and *Streptococcus pyogenes* (ATCC 27853), respectively

**Appendix XVIII.** Percent inhibition of the synthesized compounds (**8-16**) and the standard drug (ascorbic acid) at the different concentration ranges (namely 12.5, 25.0, 50.0, 100.0, and 200.0  $\mu\text{g/mL}$ )

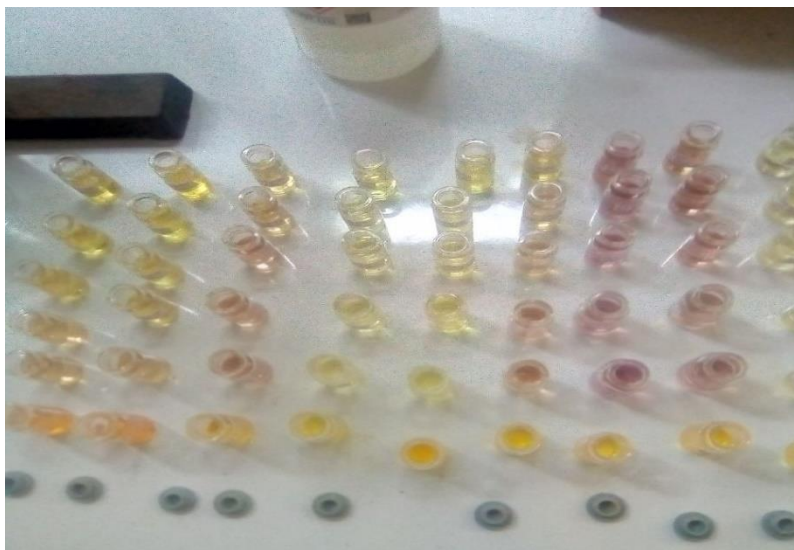

**Appendix XIX.** Bioavailability radar and Boiled- Egg model of the title, **8-16** by the drug-likeness criteria (Lipophilicity ( $-0.7 < \log P < 5.0$ ), size ( $150 \text{ g/mol} < \text{MW} < 500 \text{ g/mol}$ ), polarity ( $20^\circ \text{A}^2 < \text{TPSA} < 140^\circ \text{A}^2$ ), insolubility ( $-6 < \log S < 0$ ), unsaturation ( $0.25 < \text{Fraction Csp}^3 < 1$ ) and flexibility ( $0 < \text{Num. rotatable bonds} < 9$ )

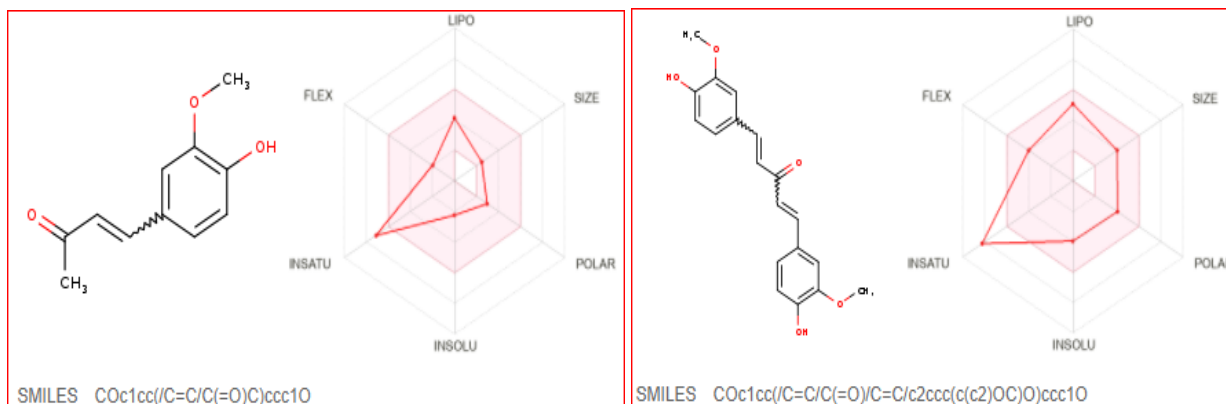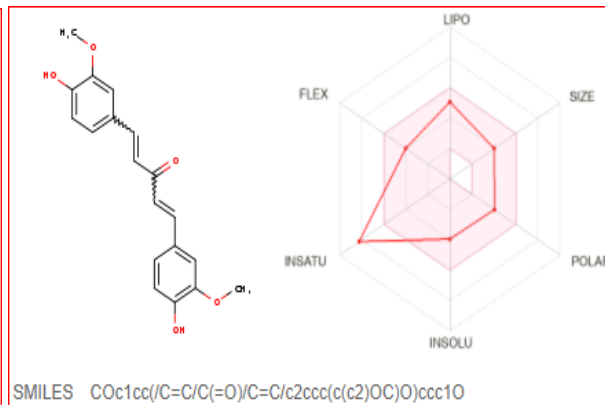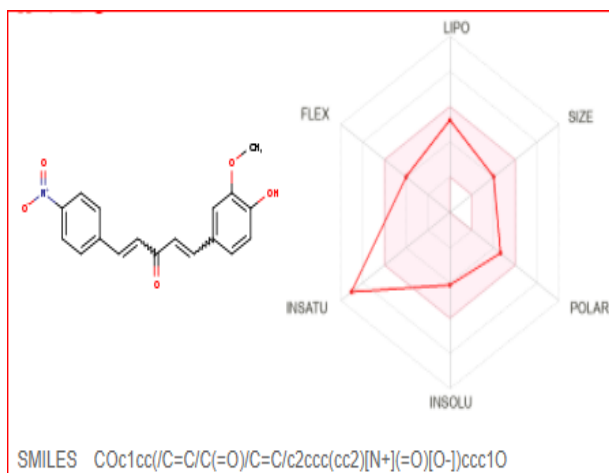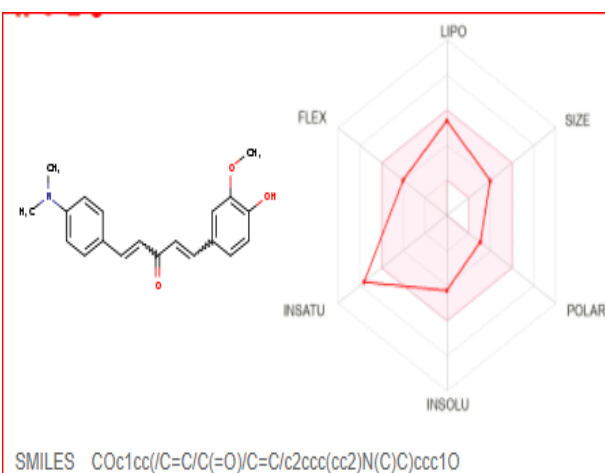

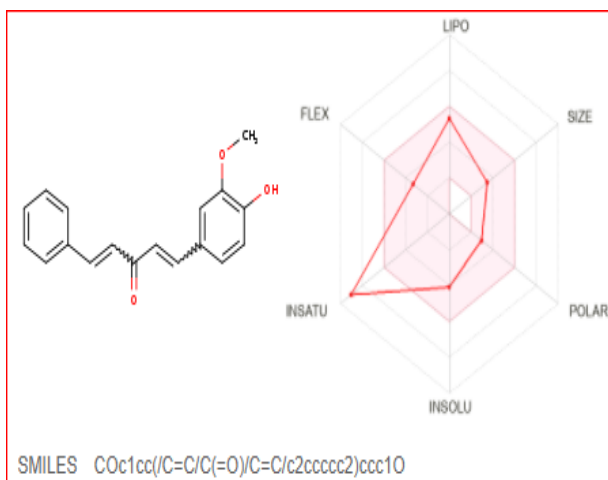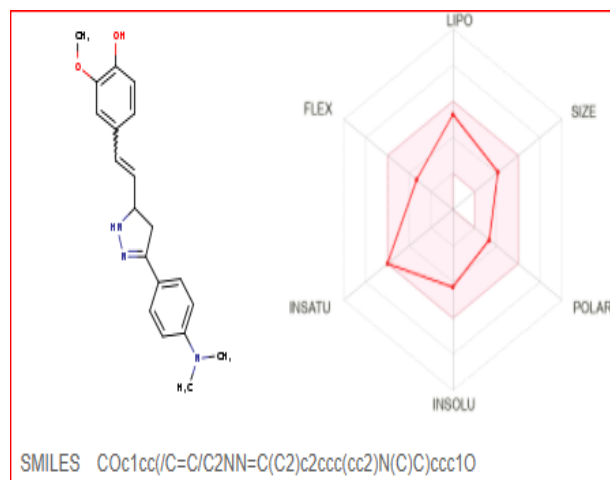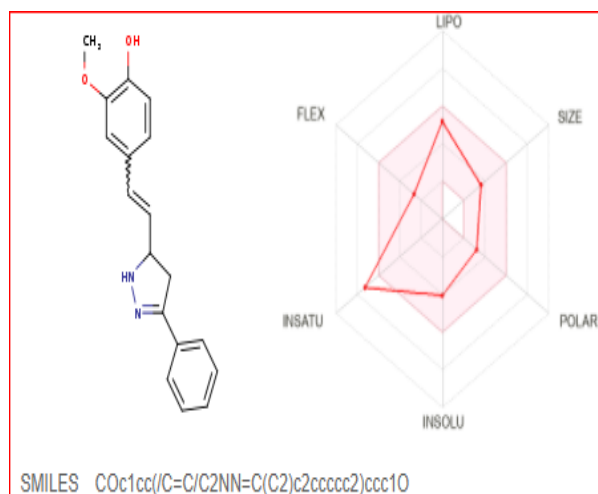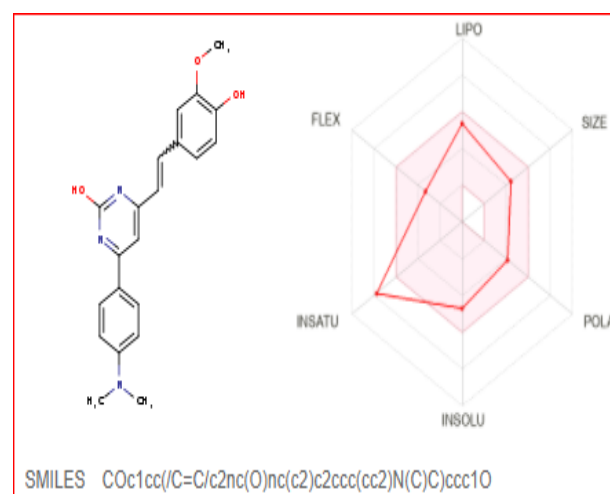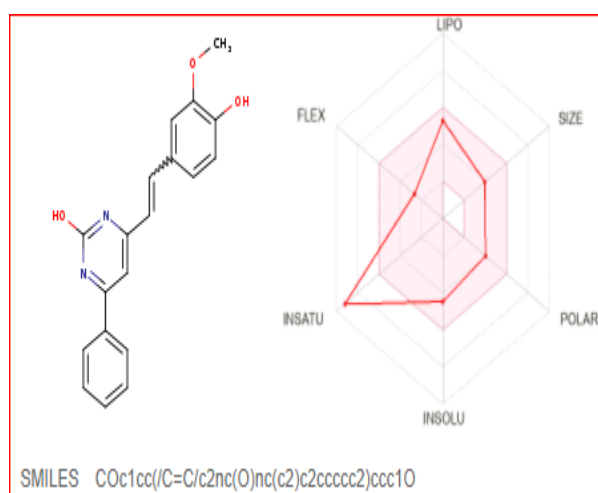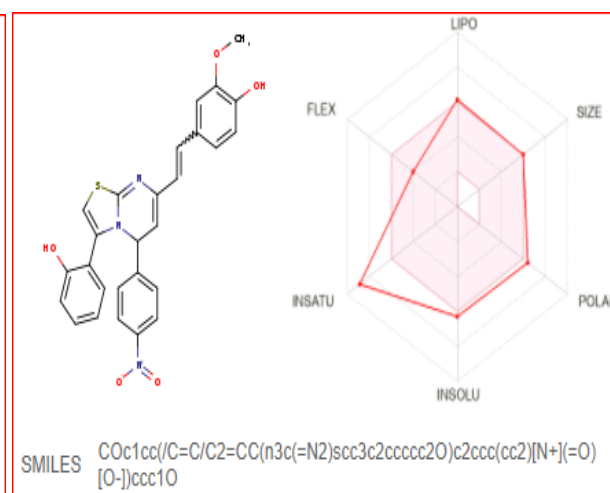

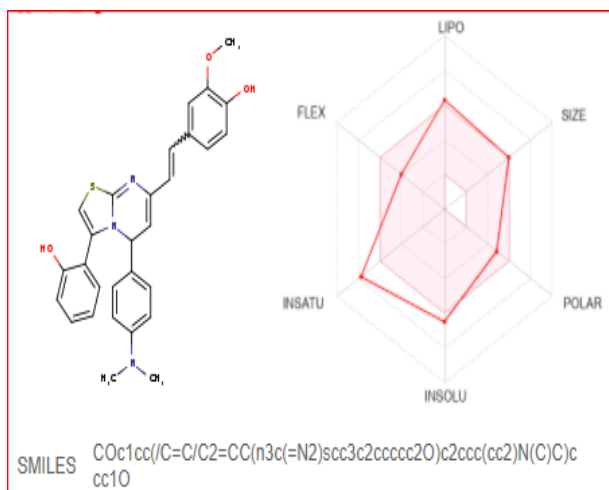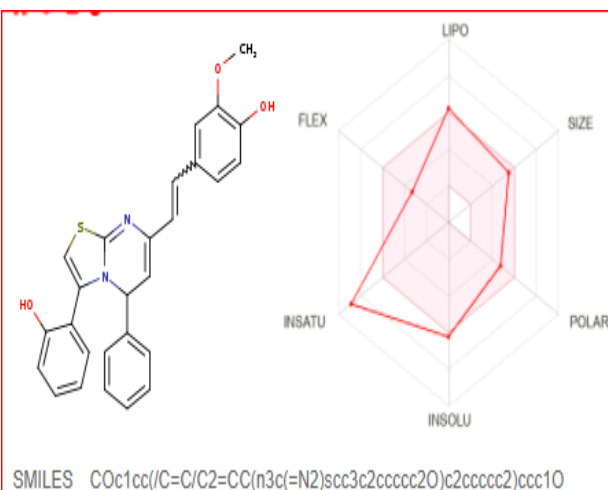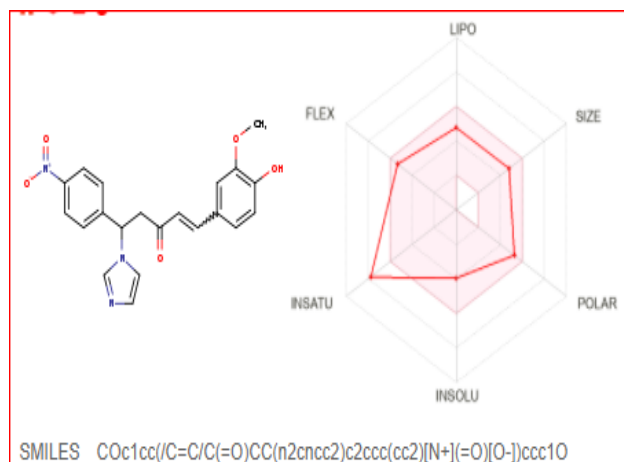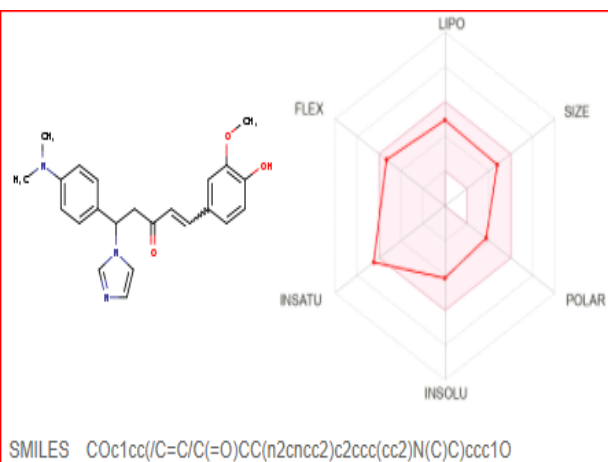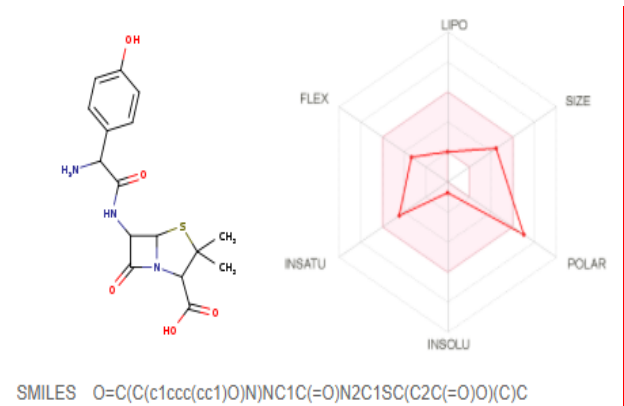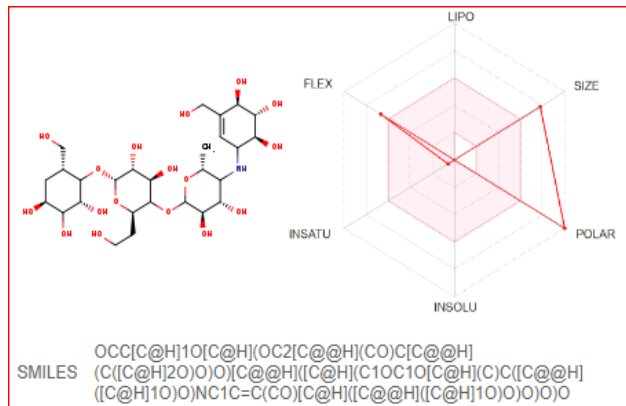

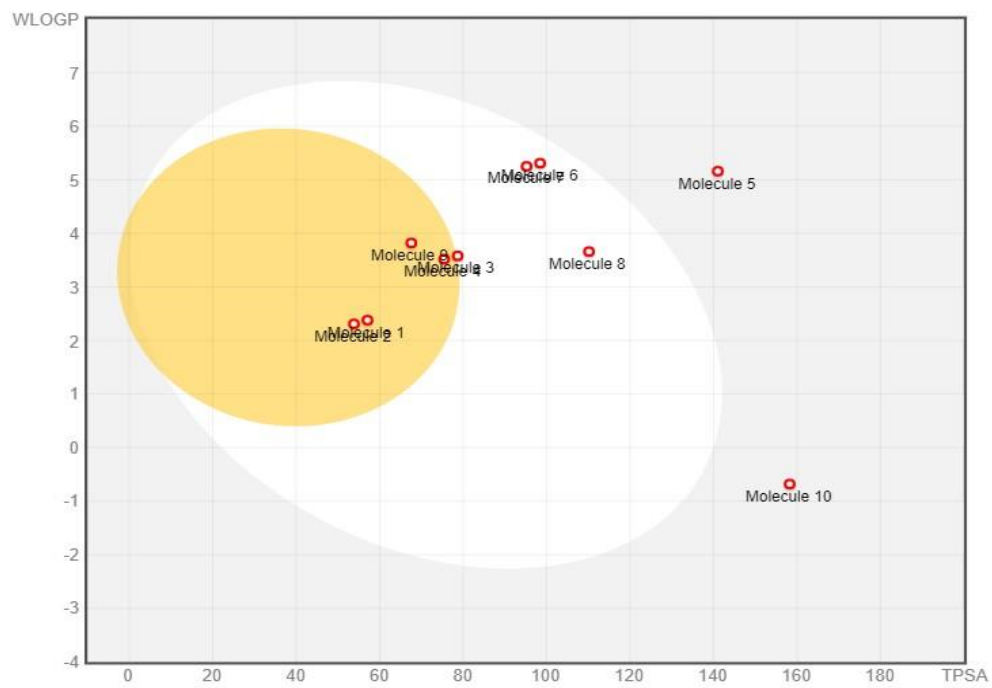



**Appendix XX.** Molecular docking scores and residual amino acid interactions of synthesized compounds (**8-16**) against *E. coli* Gyrase B. (PDB ID: 6F86).

| Synthesized compounds (Ligands) | Docking scores /Affinity (kcal/mol) | H-bonds                                                         | Amino acid residual interactions                                    |                                                  |
|---------------------------------|-------------------------------------|-----------------------------------------------------------------|---------------------------------------------------------------------|--------------------------------------------------|
|                                 |                                     |                                                                 | Hydrophobic/ $\pi$ -cation/ $\pi$ -anion/ $\pi$ -alkyl interactions | Van der Waals interactions                       |
| <b>8</b>                        | -6.5                                | Pro-79, Arg-136, Arg-76, Ile-78, Gly-77, Asn-46, Ala-47, Asp-73 |                                                                     | Glu-50, Thr-165                                  |
| <b>9</b>                        | -7.6                                | Arg-76                                                          | Asn-46, Thr-165, Ala-47, Glu-50, Pro-79                             | Gly-77, Val-167, Val-43                          |
| <b>10</b>                       | -7.5                                | Arg-76, Arg-136                                                 | Glu-50, Pro-79, Ala-47, Asp-73, Asn-46, Ile-78                      | Asp-49, Val-167, Thr-165                         |
| <b>11</b>                       | -7.9                                | Gly-77, Arg-76                                                  | Thr-165, Ala-47, Ile-94, Pro-79, Ile-78, Asn-46                     | Asp-73, Gly-75, Glu-50                           |
| <b>12</b>                       | -6.4                                | Arg-76, Arg-136                                                 | Ala-47, Thr-165, Val-167, Ile-78, Val-120, Pro-79, Met-95           | Asp-73, Val-43, Asn-46, Glu-50, Gly-77           |
| <b>13</b>                       | -6.4                                | Asp-73, Thr-165                                                 | Ile-94, Ile-78, Ala-47, Pro-79                                      | Arg-76, Asn-46, Gly-77                           |
| <b>14</b>                       | -7.6                                | Gly-77, Thr-165                                                 | Ile-78, Glu-50, Ile-94                                              | Val-120, Ala-47, Asn-46, Asp-49                  |
| <b>15</b>                       | -7.2                                | Val-167                                                         | Arg-76, Asn-46, Ile-78, Ala-47, Thr-165, Pro-79                     | Met-166, Val-71, Val-43, Asp-73, Arg-136, Gly-77 |
| <b>16</b>                       | -6.5                                |                                                                 | Pro-79, Thr-165, Ala-47, Ile-78, Ile-94                             | Arg-136, Asp-73                                  |
| <b>Amoxicillin</b>              | -6.1                                | Asp-73, Arg-76, Gly-77, Asn-46                                  | Pro-79                                                              | Ile-94, Arg-136, Thr-165                         |

**Appendix XXI.** Molecular docking scores and residual amino acid interactions of synthesized compounds (**8-16**) against the N-terminal domain of PqsA (PDB ID: 3T07\_RE1).

| Synthesized compounds (Ligands) | Docking scores \Affinity (kcal/mol) | H-bonds                            | Amino acid residual interactions                                    |                                                      |
|---------------------------------|-------------------------------------|------------------------------------|---------------------------------------------------------------------|------------------------------------------------------|
|                                 |                                     |                                    | Hydrophobic/ $\pi$ -cation/ $\pi$ -anion/ $\pi$ -alkyl interactions | Van der Waals interactions                           |
| <b>8</b>                        | -5.2                                | Gly-462, Glu-460                   | Ile-359, Ala-358, Asn-465, Val-456                                  | Ser-362, Thr-463, Thr-461, Gly-455                   |
| <b>9</b>                        | -5.8                                | Ser-383                            | Gly-270, Arg-386, Val-356                                           | Thr-387, Leu-269, Lys-390, Asn-357, Glu-352, Ser-354 |
| <b>10</b>                       | -5.6                                | Glu-460, Gly-462, Thr-463          | Val-456, Leu-355, Ala-358, Met-467, Ile-359                         | Thr-461, Asn-465, Ser-362                            |
| <b>11</b>                       | -5.3                                | Thr-463, Gly-462, Glu-460          | Leu-355, Ala-358, Ile-359, Val-456                                  | Asn-465, Thr-461                                     |
| <b>12</b>                       | -5.8                                | Asn-465, Val-456, Gly-462, Thr-463 | Ile-359, Ala-358, Pro-457, Leu-355                                  |                                                      |
| <b>13</b>                       | -5.6                                | Val-456, Asn-465                   | Ile-359, Ala-358, Thr-463, Glu-460                                  | Pro-457, Gly-462, Leu-355                            |
| <b>14</b>                       | -5.5                                | Asn-465, Val-456                   | Ala-358, Ile-359, Pro-457                                           | Gly-462, Thr-463, Glu-460                            |
| <b>15</b>                       | -5.1                                | Ser-362, Asn-465                   | Leu-355, Met-467, Ile-359, Ala-358                                  | Ser-354, Thr-353                                     |
| <b>16</b>                       | -5.3                                | Gly-462, Glu-460                   | Val-456, Asn-465, Ile-359, Ala-358, Met-467                         | Ser-362, Leu-355, Thr-461, Thr-463                   |
| <b>Amoxicillin</b>              | -4.9                                | Thr-464, Thr-463, Leu-355, Ala-358 | Ile-359                                                             | Ser-362, Ile-361                                     |

**Appendix XXII.** Molecular docking studies of synthesized compounds (**8-16**) against *S. aureus* Pyruvate Kinase (PDB ID: 4XCH).

| Synthesized compounds (Ligands) | Docking scores /Affinity (kcal/mol) | H-bonds          | Amino acid residual interactions                                         |                                                            |
|---------------------------------|-------------------------------------|------------------|--------------------------------------------------------------------------|------------------------------------------------------------|
|                                 |                                     |                  | Hydrophobic/ $\pi$ -cation/ $\pi$ -anion/ $\pi$ -alkyl interactions      | Van der Waals interactions                                 |
| <b>8</b>                        | -3.8                                | Ser-126          | Cys-127, His-57                                                          | Glu-60, Gly-128, Asn-129, Pro-120                          |
| <b>9</b>                        | -4.5                                | Cys-127, Glu-60  | His-57, His-61                                                           | Gly-128, Asn-129, Pro-120, Ser-126, Gly-121                |
| <b>10</b>                       | -5.3                                | Glu-60           | Ala-64, His-61, His-57                                                   | Gly-121, Ser-126, Gly-128, Asn-129                         |
| <b>11</b>                       | -5.6                                |                  | Ser-126, His-61, Pro-79, Leu-56, His-57                                  | Gly-128, Asn-129, Thr-53                                   |
| <b>12</b>                       | -1.6                                |                  | Ala-64, His-61, His-57, Leu-56, Cys-127, Pro-79, Ser-126, Gly-121        | Pro-120, Glu-60, Thr-122, Thr-123                          |
| <b>13</b>                       | -2.1                                | Ser-126, Asn-129 | Ala-64, Cys-127, Gly-121, Pro-79, Leu-56, His-57, His-61, Glu-60, Cys-77 | Arg-68, Gly-128, Asp-132, Thr-53                           |
| <b>14</b>                       | -2.3                                | Asn-129          | Ser-126, His-61, His-57, Glu-60, Ala-64, Cys-127                         | Gly-128, Pro-120, Gly-121                                  |
| <b>15</b>                       | -3.1                                |                  | Cys-127, Ala-64, His-57                                                  | Asn-129, Gly-128, Pro-120, Gly-121, Arg-68, Cys-77, Glu-60 |
| <b>16</b>                       | -5.1                                |                  | Pro-79, Glu-60, Ala-64, His-61, Pro-120, His-57                          | Ser-126, Gly-128, Gly-121, Asn-129                         |
| <b>Amoxicillin</b>              | -2.9                                | His-61, Glu-60   | His-57, Cys-127, Gly-121                                                 | Ser-126, Gly-128, Asn-129                                  |

**Appendix XXIII.** Molecular docking studies of synthesized compounds (**8-16**) against LuxS of *S. pyogenes* (PDB ID: 5OE3\_RE2).

| Synthesized compounds (Ligands) | Docking scores /Affinity (kcal/mol) | H-bonds                                     | Amino acid residual interactions                                                                  |                                                                                          |
|---------------------------------|-------------------------------------|---------------------------------------------|---------------------------------------------------------------------------------------------------|------------------------------------------------------------------------------------------|
|                                 |                                     |                                             | Hydrophobic/ $\pi$ -cation/ $\pi$ -anion/ $\pi$ -alkyl interactions                               | Van der Waals interactions                                                               |
| <b>8</b>                        | -7.6                                | Thr-304                                     | Asp-299, Gly-300, Ser-280, Gly-279, Ile-301, Ala-278, Phe-209                                     | Thr-323, Pro-281, His-394, Asp-382, Gly-302, Arg-397                                     |
| <b>9</b>                        | -8.1                                | Thr-304                                     | Glu-305, Ala-303, Ser-280, Pro-281, Gly-279, Ile-301                                              | Thr-164, Tyr-211, Gly-300, Gly-210, Arg-397                                              |
| <b>10</b>                       | -7.6                                |                                             | His-308, Gly-307, Ala-303, Asp-382, Arg-397, His-394, Pro-281, Gly-302, Ala-278, Phe-209, Tyr-211 | Thr-164, Thr-304, Gly-210, Gly-279                                                       |
| <b>11</b>                       | -8.6                                | Thr-304, Tyr-211, Asp-382                   | Pro-281, His-394, Ser-280, Ile-301, Gly-279, Arg-397                                              | Gly-210, Phe-209, Thr-323, Asp-299, Gly-300, Gly-302, His-308                            |
| <b>12</b>                       | -5.7                                | Gly-307                                     | Asp-382, Arg-397, Gly-279, Ile-301, Tyr-211, Ala-278, Val-309, His-308, Phe-209, Gly-210, Gly-302 | Ala-303, Thr-304, Gly-300                                                                |
| <b>13</b>                       | -4.6                                | Thr-380, Arg-372, Arg-397                   | Glu-305, Ala-303, Gly-302, Phe-209, Tyr-211, Ala-278, His-308, Ile-301                            | Ser-380, Tyr-378, Thr-164, Val-309                                                       |
| <b>14</b>                       | -7.0                                | Tyr-378, Glu-305                            | Thr-164, Thr-304, Ala-303, His-308, Phe-209, Gly-302, Ala-278, Arg-397                            | Thr-380, Arg-372, Gly-210, Gly-307, Tyr-211                                              |
| <b>15</b>                       | -8.8                                | Thr-304, Val-309                            | Ala-303, Arg-397, Ile-301, Gly-210, His-308, Gly-302                                              | Thr-164, Arg-372, Thr-380, Tyr-378, Asp-382, Ser-280, Gly-279, Tyr-211                   |
| <b>16</b>                       | -9.1                                | Val-309                                     | His-308, Gly-302, Asp-382, Ala-303, Ile-301, Gly-279, Asp-299, Ala-278, Gly-300, His-394, Phe-209 | Thr-304, Thr-164, Arg-397, Thr-380, Ser-280, Asp-299, Ala-278, Gly-300, His-394, Phe-209 |
| <b>Amoxicillin</b>              | -7.9                                | Glu-305, Asp-299, Thr-323, Gly-302, Gly-279 | Ser-280, Pro-281, Ile-301, Asp-382                                                                | Thr-304, Gly-300, Leu-282, Arg-397, Thr-380, Tyr-378                                     |

**Appendix XXIV.** Molecular docking studies of most active synthesized compounds (**8**, **11**, and **16**) against Penicillin binding proteins (PBPs) (PDB ID: 1VQQ).

| Synthesized compounds (Ligands) | Docking scores/Affinity (kcal/mol) | H-bonds          | Amino acid residual interactions                                    |                                                               |
|---------------------------------|------------------------------------|------------------|---------------------------------------------------------------------|---------------------------------------------------------------|
|                                 |                                    |                  | Hydrophobic/ $\pi$ -cation/ $\pi$ -anion/ $\pi$ -alkyl interactions | Van der Waals interactions                                    |
| <b>8</b>                        | -6.7                               | Arg-241, Ser-240 | Asp-295, Asp-275, Val-277                                           | Lys-148, Glu-294, Lys-273, Val-256, Met-372, Try-373          |
| <b>11</b>                       | -7.5                               | Ser-240          | His-293, Val-277, Asp-295, Ala-276, Lys-273                         | Met-372, Glu-239, Ser-149, Lys-148, Glu-294                   |
| <b>16</b>                       | -6.9                               | Ser-149          | His-293, Glu-150, Val-277, Thr-165, Pro-258, Met-372                | Asp-295, Arg-241, Thr-165, Ser-240, Val-256, Gly-257, Tyr-373 |
| <b>Amoxicillin</b>              | -7.2                               | Lys-148, Asp-275 | Val-277, His-293, Arg-241, Arg-151                                  | Ala-276, Ser-149, Asn-164, Gly-166, Thr-165, Ser-240          |

**Appendix XXV.** Molecular docking studies of most active synthesized compounds (**8**, **11**, and **16**) against  $\beta$ -lactamases (PDB ID: 1IYS).

| Synthesized compounds (Ligands) | Docking scores/Affinity (kcal/mol) | H-bonds                                                       | Amino acid residual interactions                                    |                                                                                         |
|---------------------------------|------------------------------------|---------------------------------------------------------------|---------------------------------------------------------------------|-----------------------------------------------------------------------------------------|
|                                 |                                    |                                                               | Hydrophobic/ $\pi$ -cation/ $\pi$ -anion/ $\pi$ -alkyl interactions | Van der Waals interactions                                                              |
| <b>8</b>                        | -6.9                               | Tyr-105, Asn-104, Asn-170                                     | Asn-132                                                             | Trr-129, Thr-215, Ser-218, Thr-126, Ala-219, Ser-130, Asn-132, Ser-132, Glu-166, Ser-70 |
| <b>11</b>                       | -8.3                               | Ser-70                                                        | Tyr-105, Asp-240, Pro-167                                           | Asn-132, Ser-237, Thy-168, Thr-171, Asn-104, Asn-170, Glu-166, Ser-130                  |
| <b>16</b>                       | -7.7                               | Arg-276, Thr-216, Ser-70, Lys-73                              | Gly-236, Tyr-105                                                    | Asn-132, Ser-130, Gly-236, Asn-104, Ser-237, Asn-170, Thr-235, Gly-236                  |
| <b>Amoxicillin</b>              | -7.9                               | Thr-235, Ser-130, Ser-237, Asn-132, Glu-166, Asn-170, Thr-216 | Arg-276, Tyr-105                                                    | Asn-104, Lys-234                                                                        |

**Appendix XXVI.** Molecular docking studies of synthesized compounds (**8-16**) against Human peroxiredoxin 5 (PDB ID: 1HD2\_M1).

| Synthesized compounds (Ligands) | Docking scores/Affinity (kcal/mol) | H-bonds                                  | Amino acid residual interactions                                    |                                                            |
|---------------------------------|------------------------------------|------------------------------------------|---------------------------------------------------------------------|------------------------------------------------------------|
|                                 |                                    |                                          | Hydrophobic/ $\pi$ -cation/ $\pi$ -anion/ $\pi$ -alkyl interactions | Van der Waals interactions                                 |
| <b>8</b>                        | -5.6                               | Thr-147                                  | Leu-116                                                             | Arg-127, Asn-76, Arg-124, Phe-120, Thr-44, Ile-119         |
| <b>9</b>                        | -5.4                               | Thr-147                                  | Leu-116, Thr-44, Phe-120                                            | Arg-127, Phe-43                                            |
| <b>10</b>                       | -5.4                               | Ile-119, Gly-46                          | Leu-116, Thr-147, Pro-45                                            | Thr-44, Ala-147                                            |
| <b>11</b>                       | -5.5                               |                                          | Phe-120, Ile-119, Ala-42, Pro-45                                    | Phe-43, Thr-44, Leu-149, Gly-46, Arg-127, Thr-147, Leu-116 |
| <b>12</b>                       | -4.9                               | Thr-147, Gly-46, Ile-119                 | Leu-116, Phe-43, Pro-45                                             | Arg-127, Gly-148, Asp-145, Thr-44                          |
| <b>13</b>                       | -4.6                               | Thr-147, Gly-46                          | Ile-119, Pro-45, Phe-120, Thr-44                                    | Arg-127, Phe-43                                            |
| <b>14</b>                       | -5.6                               | Thr-147, Arg-127, Ile-119                | Ala-42, Pro-45                                                      | Gly-148, Gly-46, Thr-44                                    |
| <b>15</b>                       | -4.8                               | Thr-44, Gly-46, Arg-127, Cys-47, Thr-147 | Pro-45, Leu-116, Asp-145                                            |                                                            |
| <b>16</b>                       | -4.9                               | Ile-119, Thr-44                          | Thr-147, Leu-116, Pro-45, Ala-42, Phe-120, Pro-40, Cys-47           | Asp-145, Arg-124, Gly-46, Arg-127                          |
| <b>Amox</b>                     | -5.4                               | Thr-147, Arg-127, Gly-46                 | Ile-119, Phe-120, Pro-45                                            | Thr-44, Cys-47, Leu-149                                    |
| <b>Vit C</b>                    | -5.8                               | Thr-44, Arg-127, Thr-147, Gly-46, Cys-47 |                                                                     | Leu-149, Pro-40                                            |

**Appendix XXVII.** Molecular docking studies of most active synthesized compounds (**8**, **11**, and **16**) against  $\alpha$ -amylase enzyme (PDB ID: 4w93).

| Synthesized compounds (Ligands) | Docking scores/Affinity (kcal/mol) | H-bonds                           | Amino acid residual interactions                                    |                                                                      |
|---------------------------------|------------------------------------|-----------------------------------|---------------------------------------------------------------------|----------------------------------------------------------------------|
|                                 |                                    |                                   | Hydrophobic/ $\pi$ -cation/ $\pi$ -anion/ $\pi$ -alkyl interactions | Van der Waals interactions                                           |
| <b>8</b>                        | -8.4                               | Glu-233                           | His-201, Trp-59, Trp-58, Ile-235                                    | Arg-195, Ala-198, Lys-200, Tyr-151, Tyr-62, Gln-63                   |
| <b>11</b>                       | -7.4                               | His-299                           | Arg-195, Asp-197, His-201, Ile-235, Lys-200, Tyr-62, Leu-165        | Tyr-59, Gln-63, His-101, Tyr-151, Ala-198, Glu-233                   |
| <b>16</b>                       | -8.2                               | Glu-233                           | His-299, Tyr-62, Ala-198, Leu-162                                   | Tyr-58, Asp-300, Asn-298, Leu-165, Thr-163                           |
| <b>Acarbose</b>                 | -7.5                               | Asp-300, Ile-235, Trp-59, Glu-240 | Ala-198, Leu-162                                                    | Gly-00, His-305, Trp-58, Ala-307, Leu-237, Leu-165, His-101, Asp-197 |



**Appendix XXVIIIa.** 3D (right) and 2D (left) representations of the binding interactions of **8** against *E. coli* DNA Gyrase B (PDB ID: 6f86)

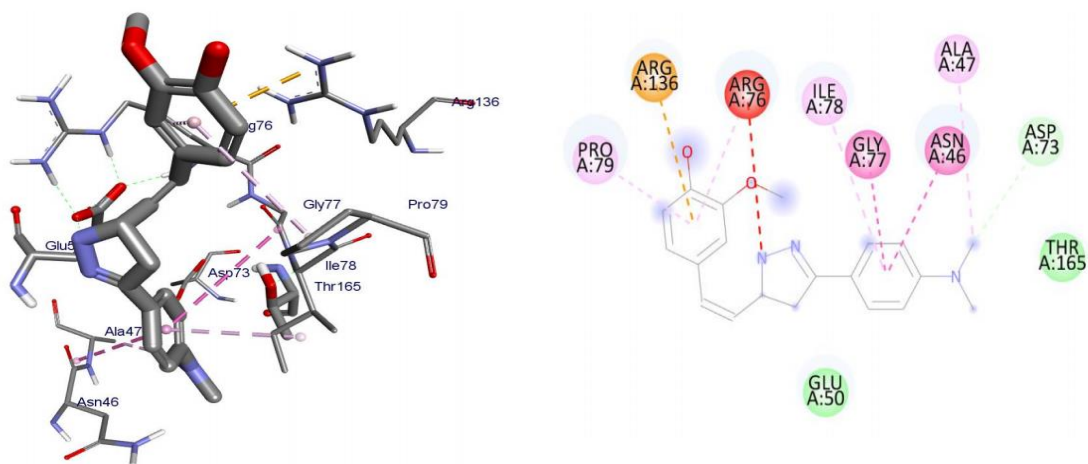

**Appendix XXVIIIb.** 3D (right) and 2D (left) representations of the binding interactions of **9** against *E. coli* DNA Gyrase B (PDB ID: 6f86)

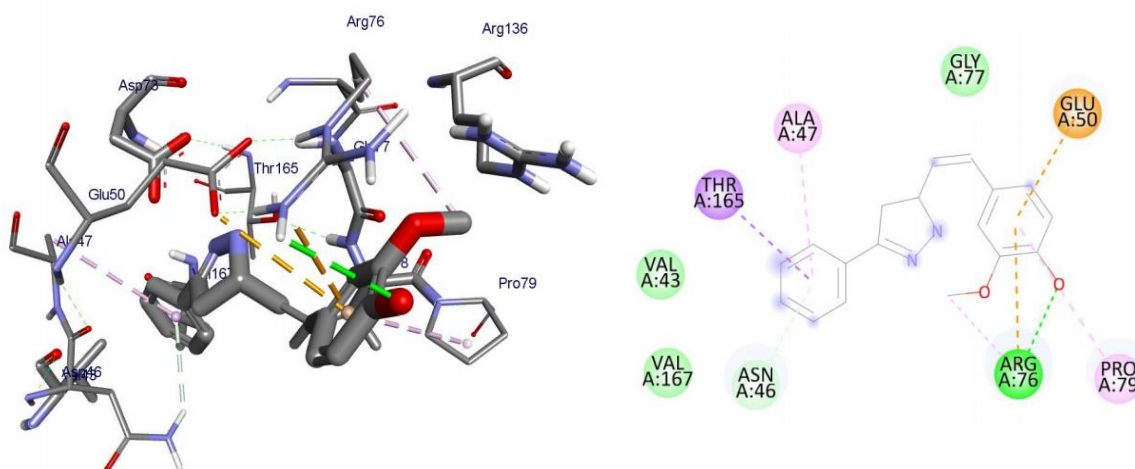

**Appendix XXVIIIc.** 3D (right) and 2D (left) representations of the binding interactions of **10** against *E. coli* DNA Gyrase B (PDB ID: 6f86)

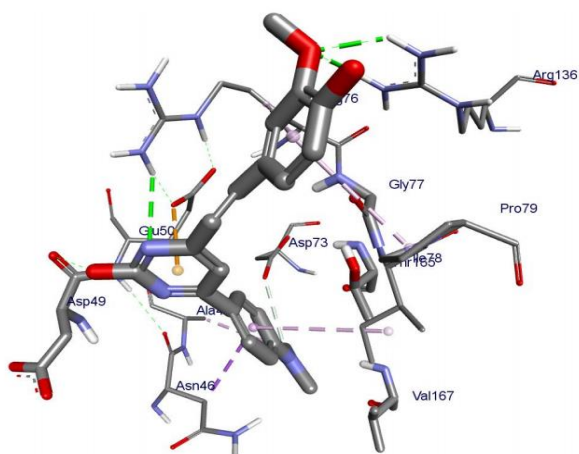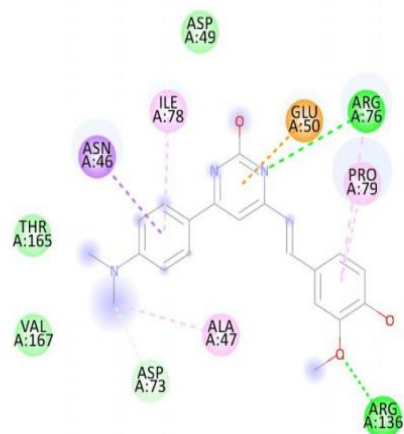

**Appendix XXVIII d.** 3D (right) and 2D (left) representations of the binding interactions of **11** against *E. coli* DNA Gyrase B (PDB ID: 6f86)

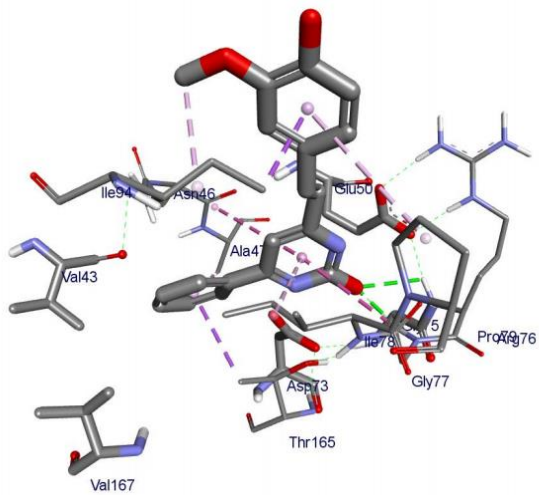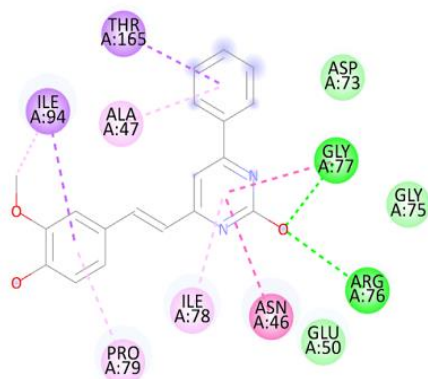

**Appendix XXVIII e.** 3D (right) and 2D (left) representations of the binding interactions of **12** against *E. coli* DNA Gyrase B (PDB ID: 6f86)

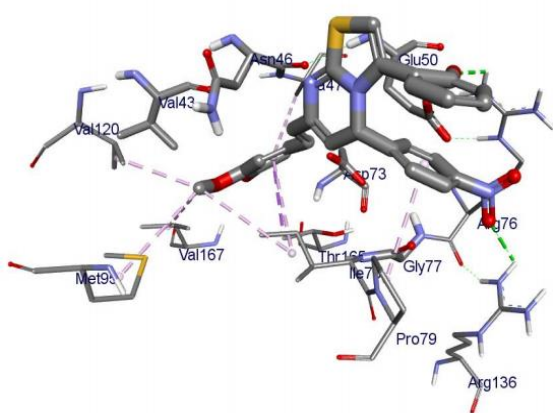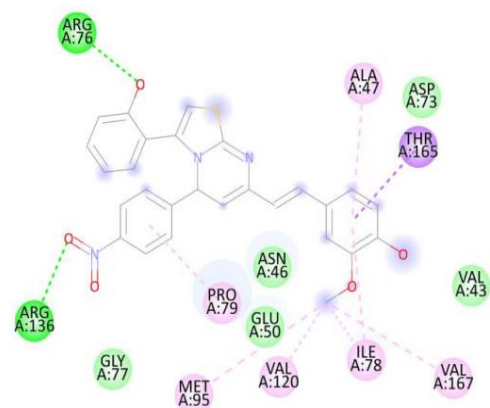

**Appendix XXVIII.f.** 3D (right) and 2D (left) representations of the binding interactions of **13** against *E. coli* DNA Gyrase B (PDB ID: 6f86).

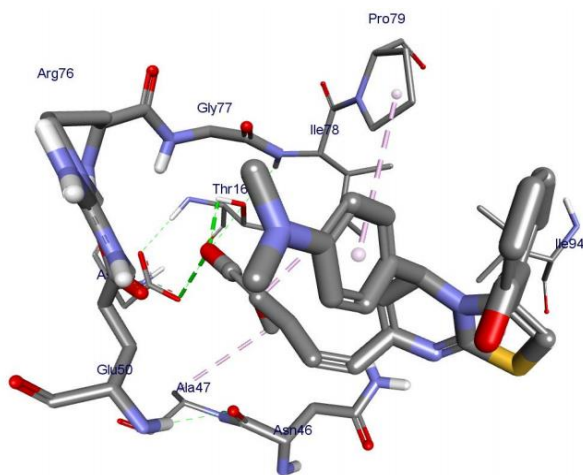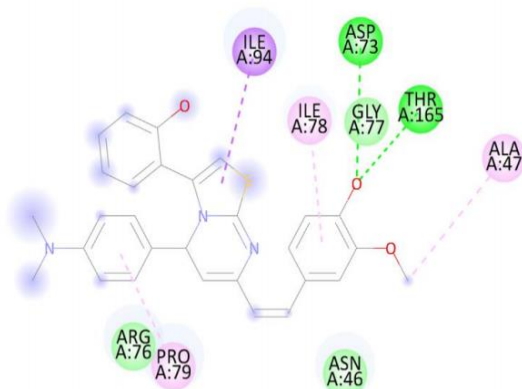

**Appendix XXVIII.g.** 3D (right) and 2D (left) representations of the binding interactions of **14** against *E. coli* DNA Gyrase B (PDB ID: 6f86).

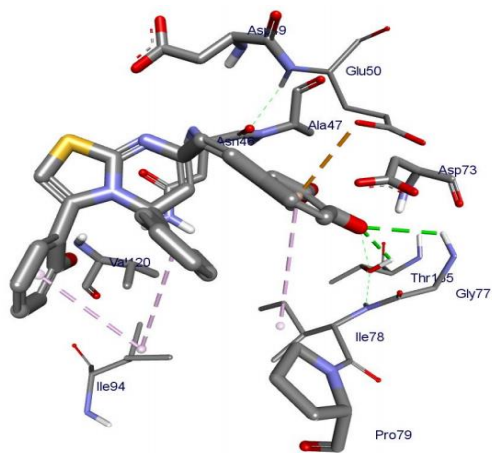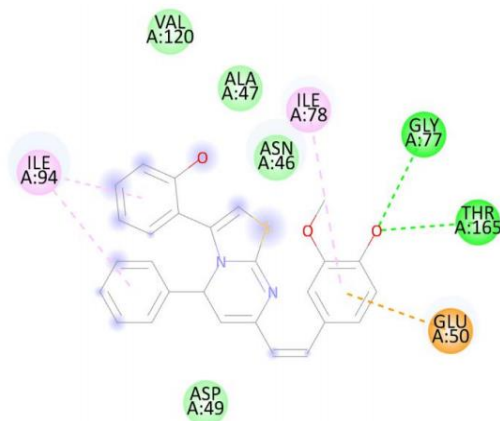

**Appendix XXVIIIh.** 3D (right) and 2D (left) representations of the binding interactions of **15** against *E. coli* DNA Gyrase B (PDB ID: 6f86).

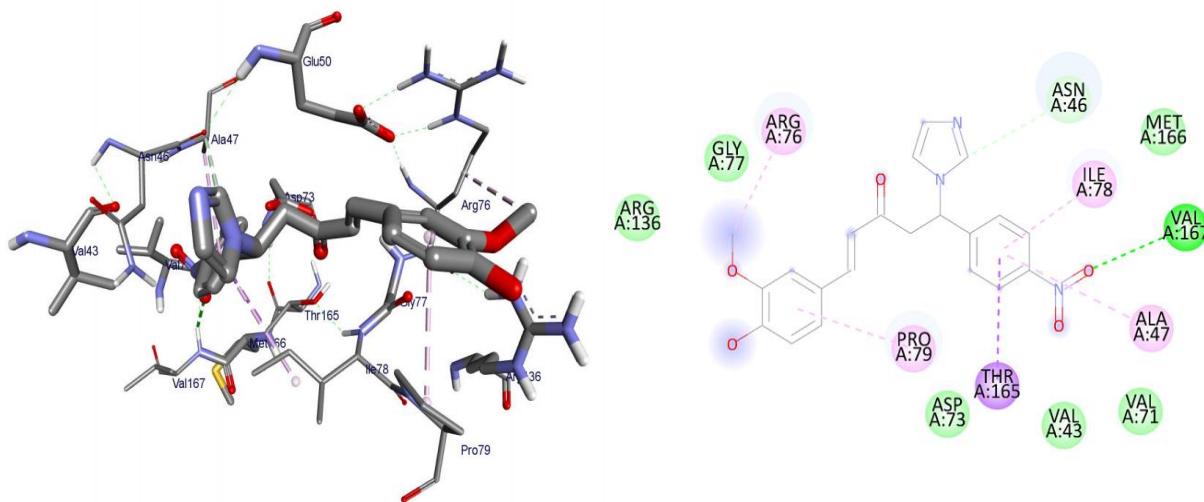

**Appendix XXVIIIi.** 3D (right) and 2D (left) representations of the binding interactions of **16** against *E. coli* DNA Gyrase B (PDB ID: 6f86).

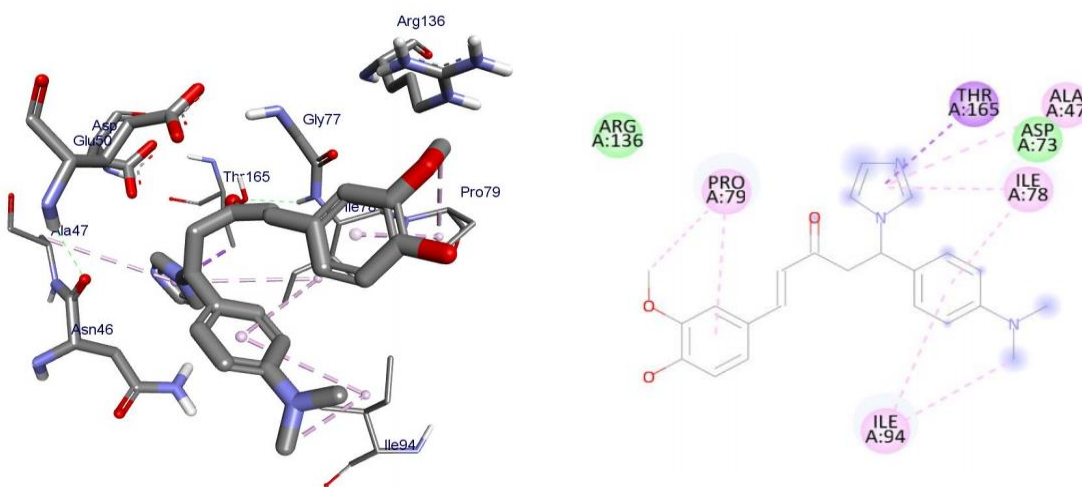

**Appendix XXVIIIj.** 3D (right) and 2D (left) representations of the binding interactions of **amoxicillin** against *E. coli* DNA Gyrase B (PDB ID: 6f86).

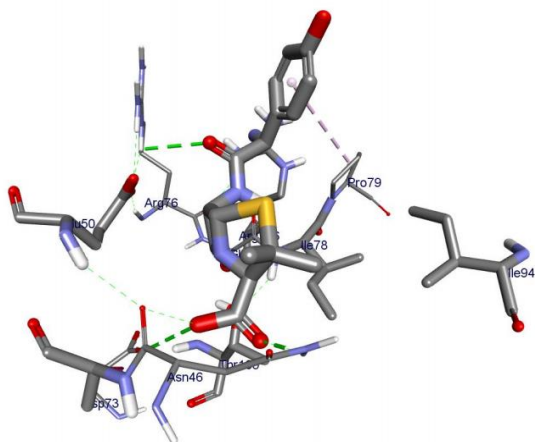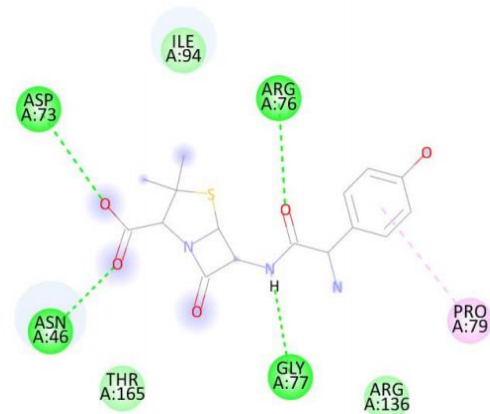

**Appendix XXIXa.** 3D (right) and 2D (left) representations of the binding interactions of **8** against N-terminal domain of PqsA (PDB ID: 5oe3).

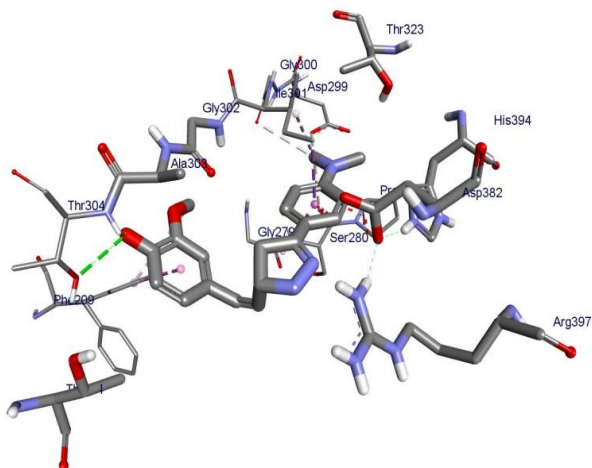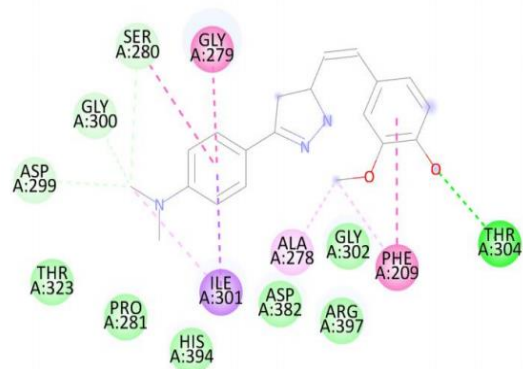

**Appendix XXIXb.** 3D (right) and 2D (left) representations of the binding interactions **9** of against N-terminal domain of PqsA (PDB ID: 5oe3).

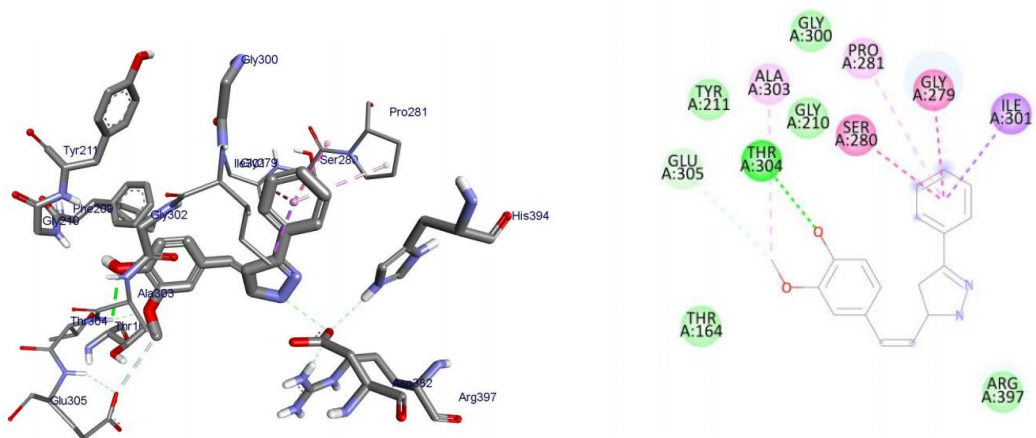

**Appendix XXIXc.** 3D (right) and 2D (left) representations of the binding interactions **10** of against N-terminal domain of PqsA (PDB ID: 5oe3).

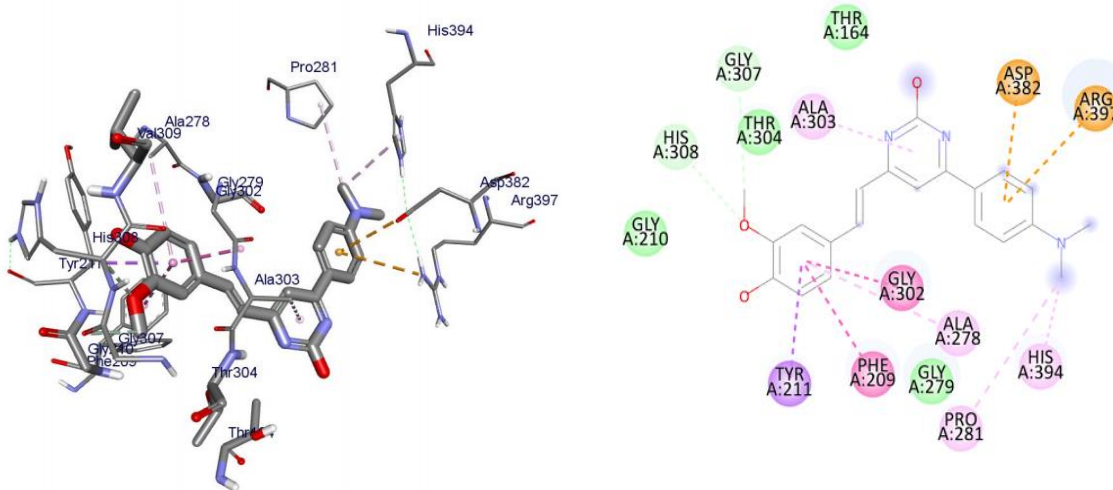

**Appendix XXIXd.** 3D (right) and 2D (left) representations of the binding interactions of **11** against N-terminal domain of PqsA (PDB ID: 5oe3).

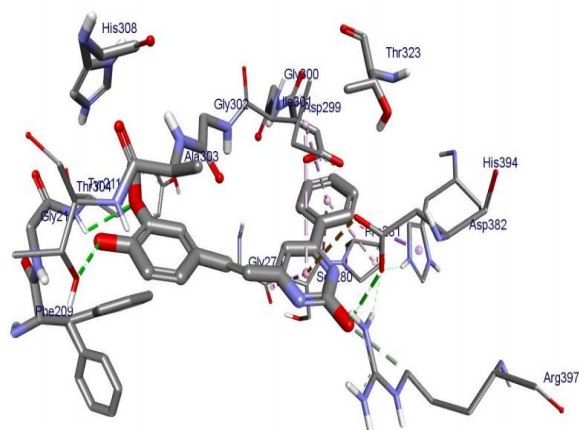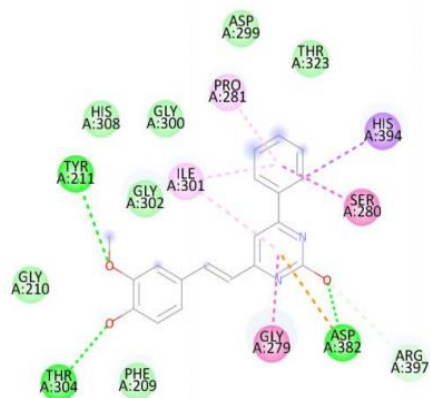

**Appendix XXIXe.** 3D (right) and 2D (left) representations of the binding interactions of **12** against N-terminal domain of PqsA (PDB ID: 5oe3).

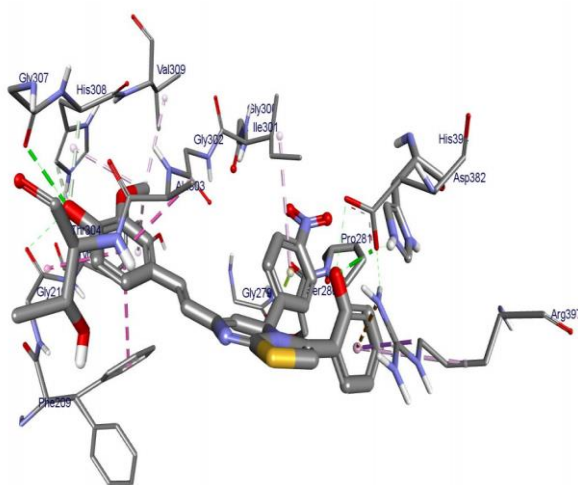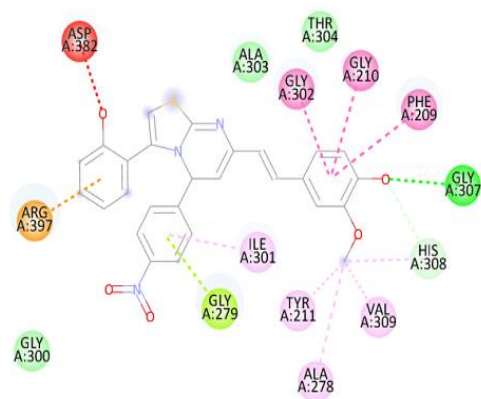

**Appendix XXIXf.** 3D (right) and 2D (left) representations of the binding interactions of **13** against N-terminal domain of PqsA (PDB ID: 5oe3).

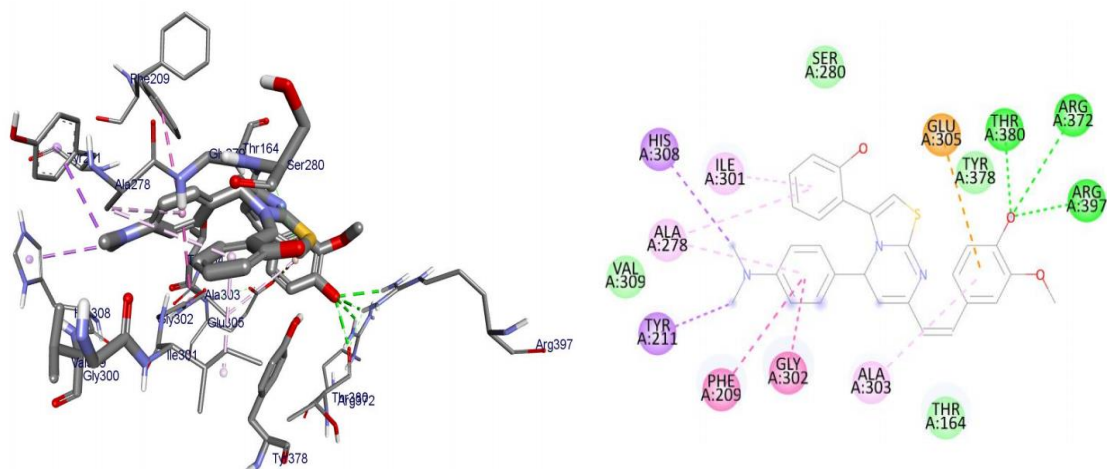

**Appendix XXIXg.** 3D (right) and 2D (left) representations of the binding interactions of **14** against N-terminal domain of PqsA (PDB ID: 5oe3).

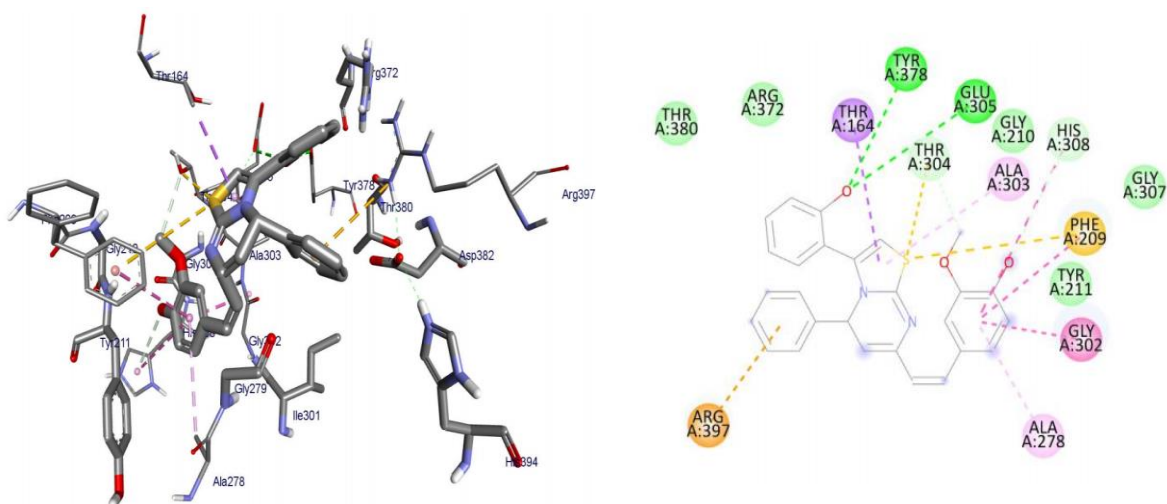

**Appendix XXIXh.** 3D (right) and 2D (left) representations of the binding interactions of **15** against N-terminal domain of PqsA (PDB ID: 5oe3).



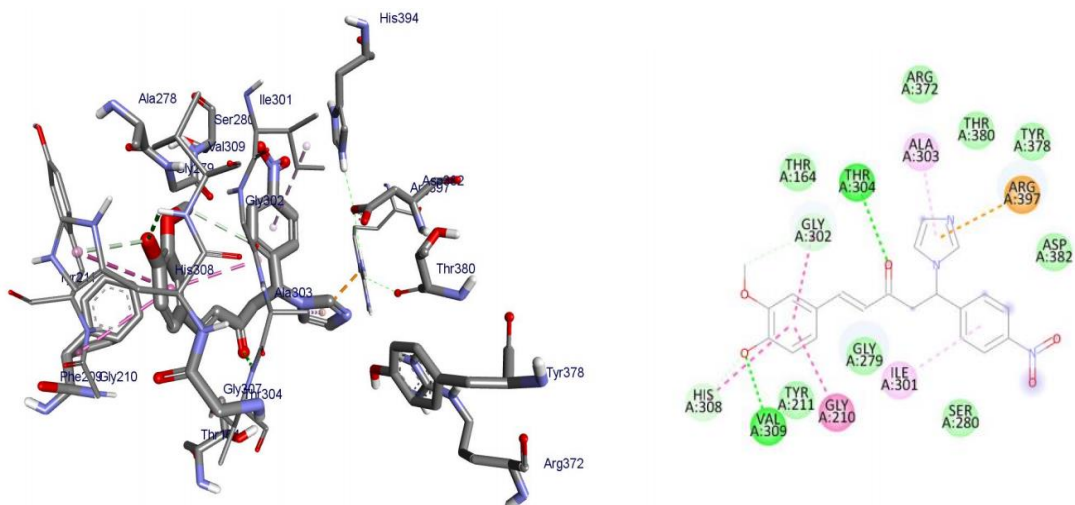

**Appendix XXIXi.** 3D (right) and 2D (left) representations of the binding interactions of **16** against N-terminal domain of PqsA (PDB ID: 5oe3).

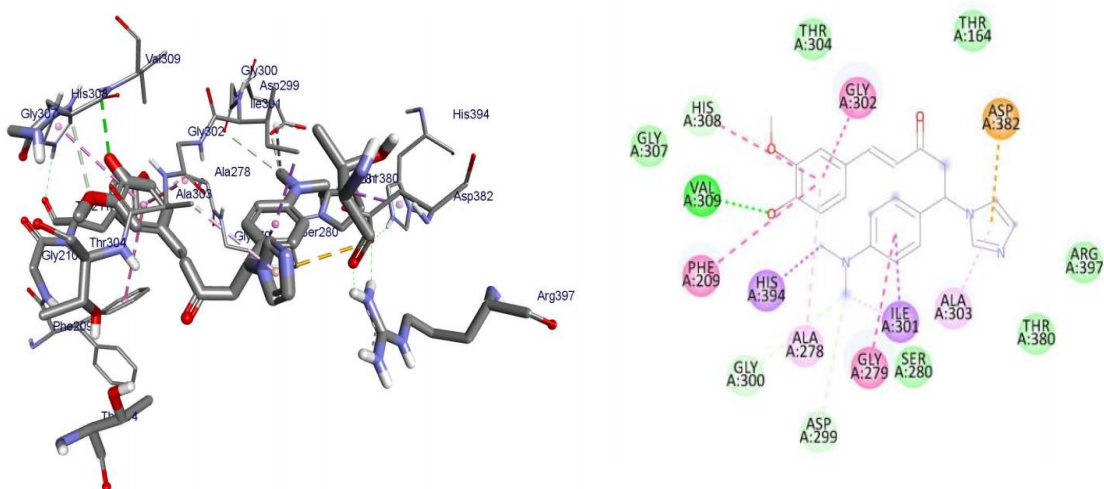

**Appendix XXIXj.** 3D (right) and 2D (left) representations of the binding interactions of **amoxicillin** against N-terminal domain of PqsA (PDB ID: 5oe3).

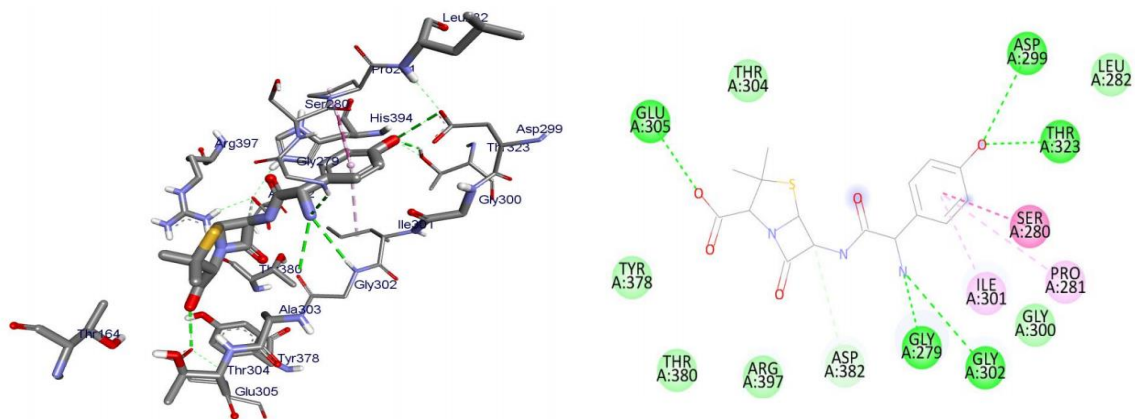

**Appendix XXXa.** 3D (right) and 2D (left) representations of the binding interactions of **8** against *S. aureus* Pyruvate Kinase (PDB ID: 3t07).

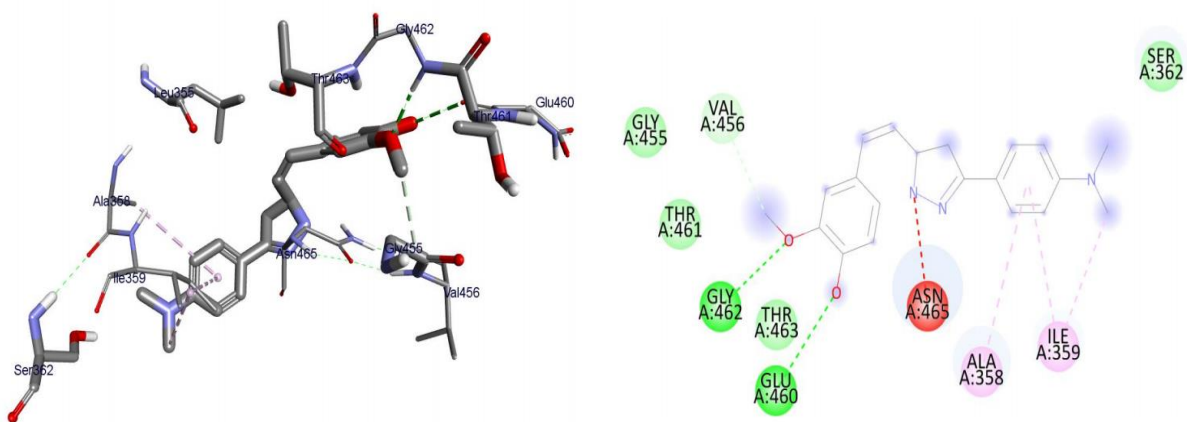

**Appendix XXXb.** 3D (right) and 2D (left) representations of the binding interactions of **9** against *S. aureus* Pyruvate Kinase (PDB ID: 3t07).

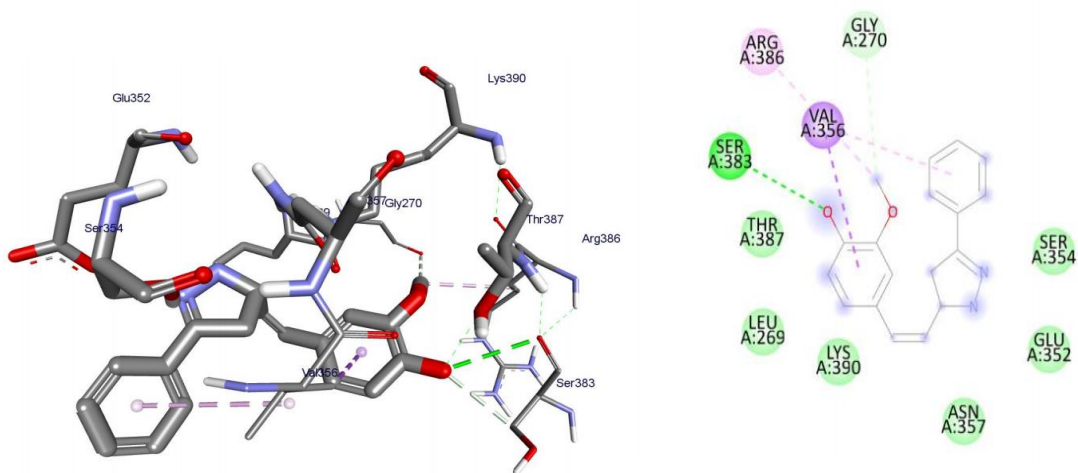

**Appendix XXXc.** 3D (right) and 2D (left) representations of the binding interactions of **10** against *S. aureus* Pyruvate Kinase in complex (PDB ID: 3t07).

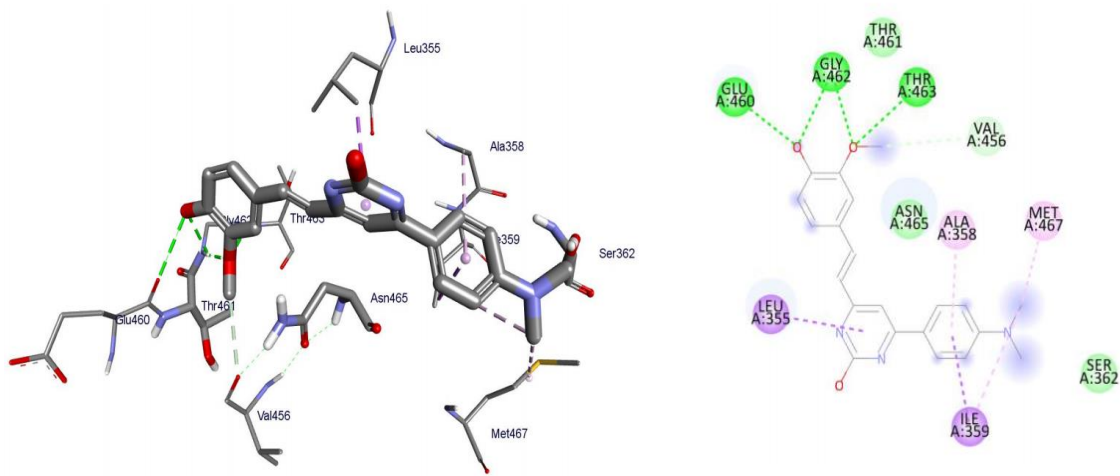

**Appendix XXXd.** 3D (right) and 2D (left) representations of the binding interactions of **11** against *S. aureus* Pyruvate Kinase (PDB ID: 3t07).

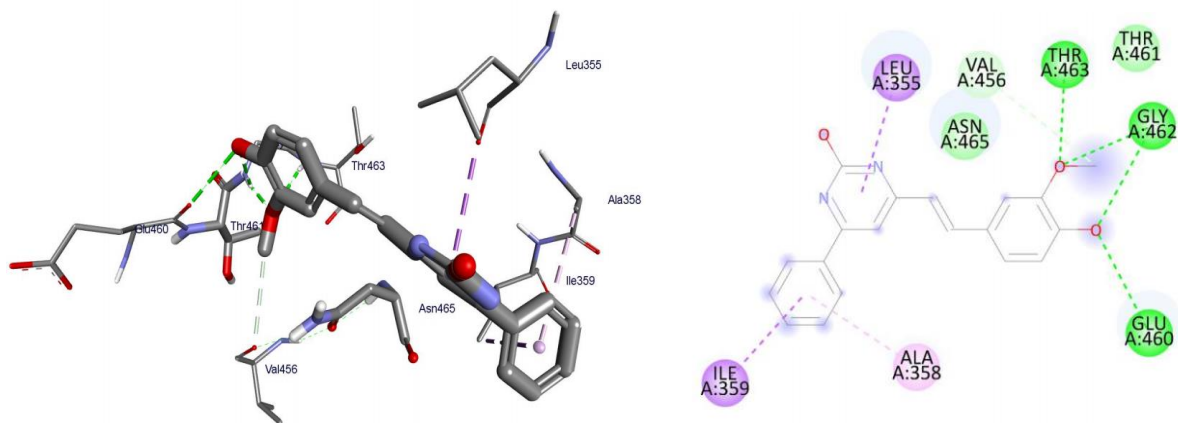

**Appendix XXXe.** 3D (right) and 2D (left) representations of the binding interactions of **12** against *S. aureus* Pyruvate Kinase (PDB ID: 3t07).

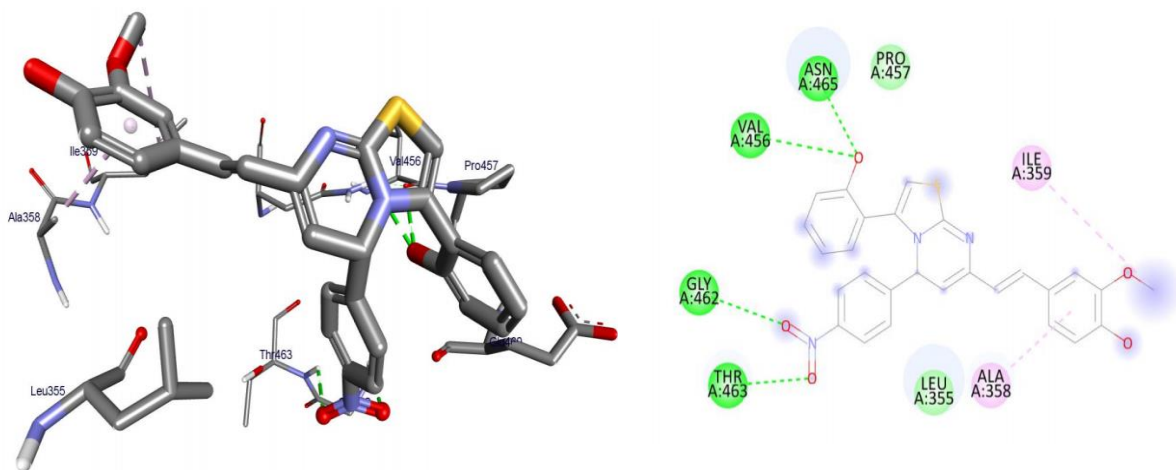

**Appendix XXXf.** 3D (right) and 2D (left) representations of the binding interactions of **13** against *S. aureus* Pyruvate Kinase (PDB ID: 3t07).

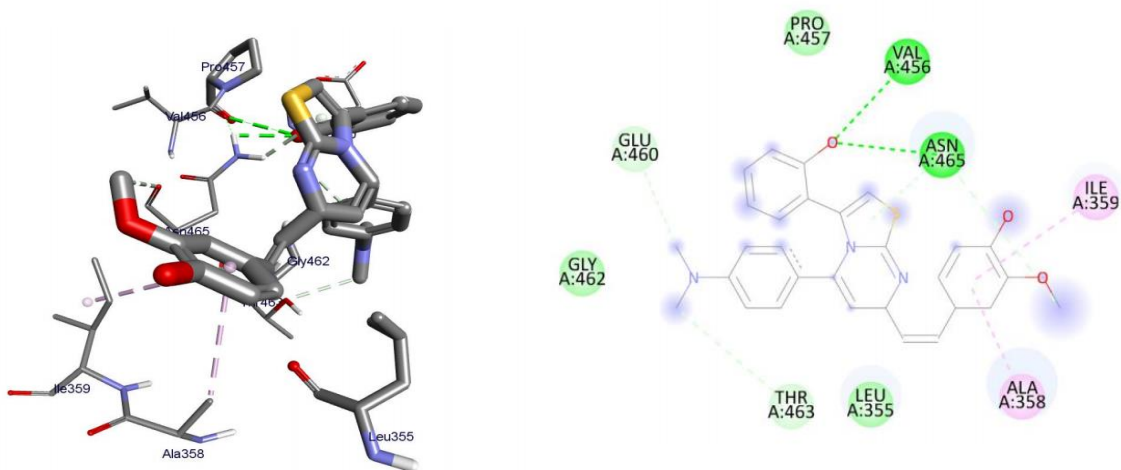

**Appendix XXXg.** 3D (right) and 2D (left) representations of the binding interactions of **14** against *S. aureus* Pyruvate Kinase (PDB ID: 3t07).

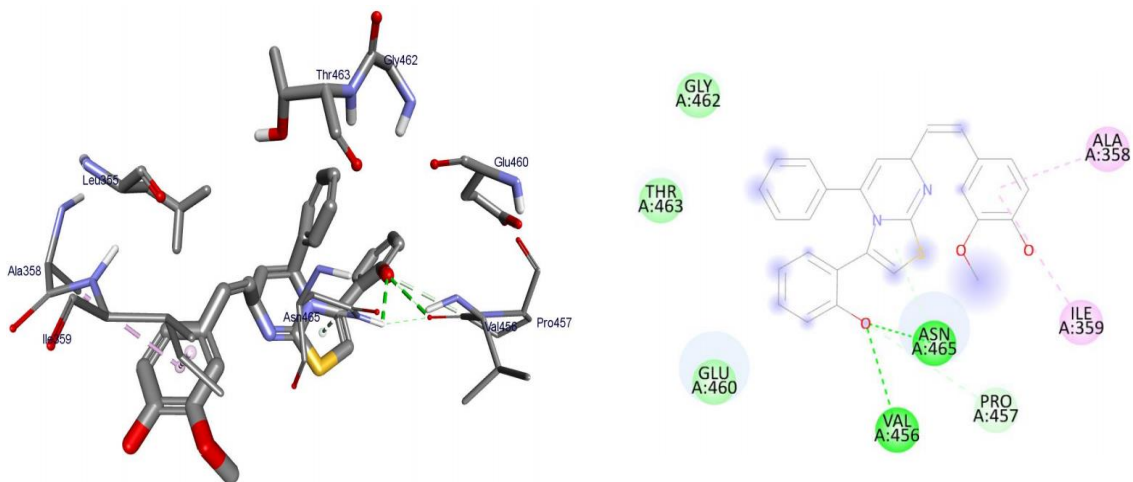

**Appendix XXXh.** 3D (right) and 2D (left) representations of the binding interactions of **15** against *S. aureus* Pyruvate Kinase (PDB ID: 3t07).

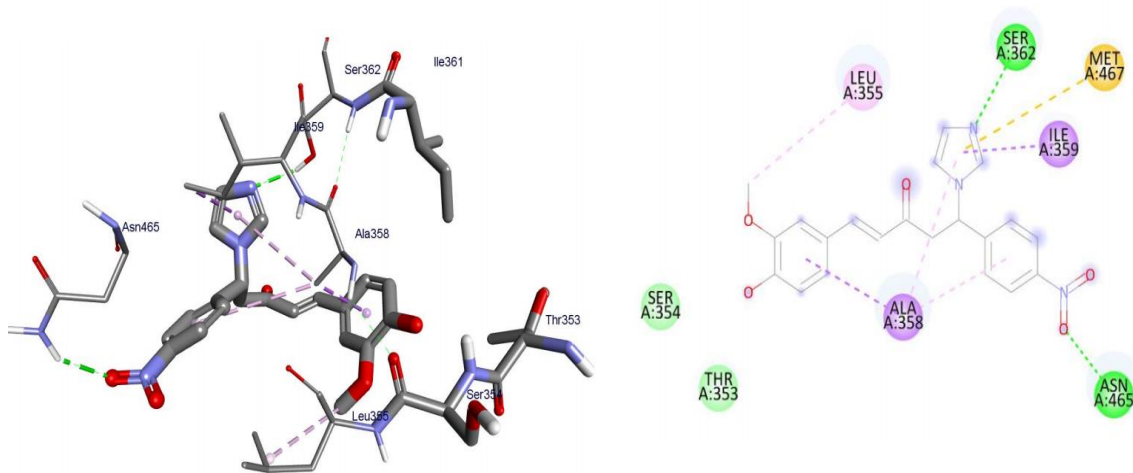

**Appendix XXXi.** 3D (right) and 2D (left) representations of the binding interactions of **16** against *S. aureus* Pyruvate Kinase (PDB ID: 3t07).

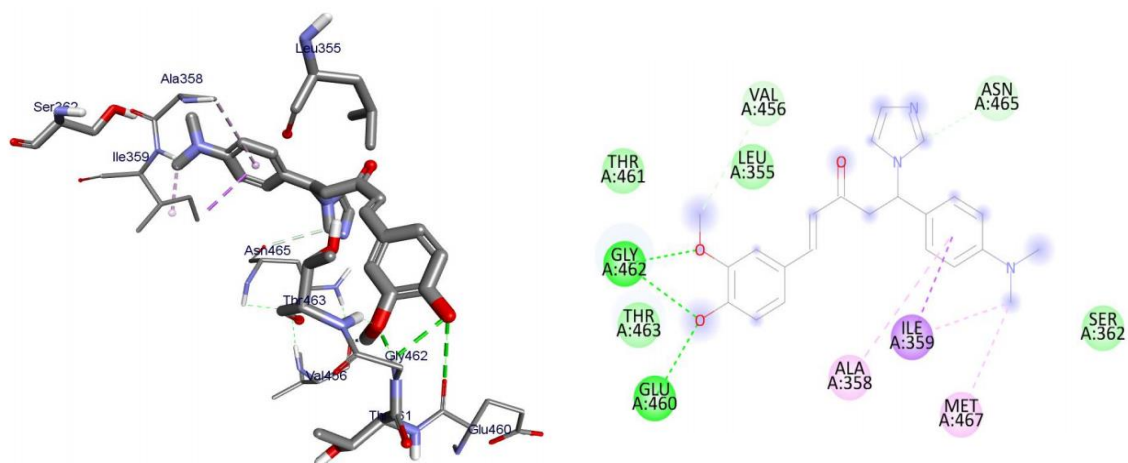

**Appendix XXXj.** 3D (right) and 2D (left) representations of the binding interactions of **amoxicillin** against *S. aureus* Pyruvate Kinase (PDB ID: 3t07).

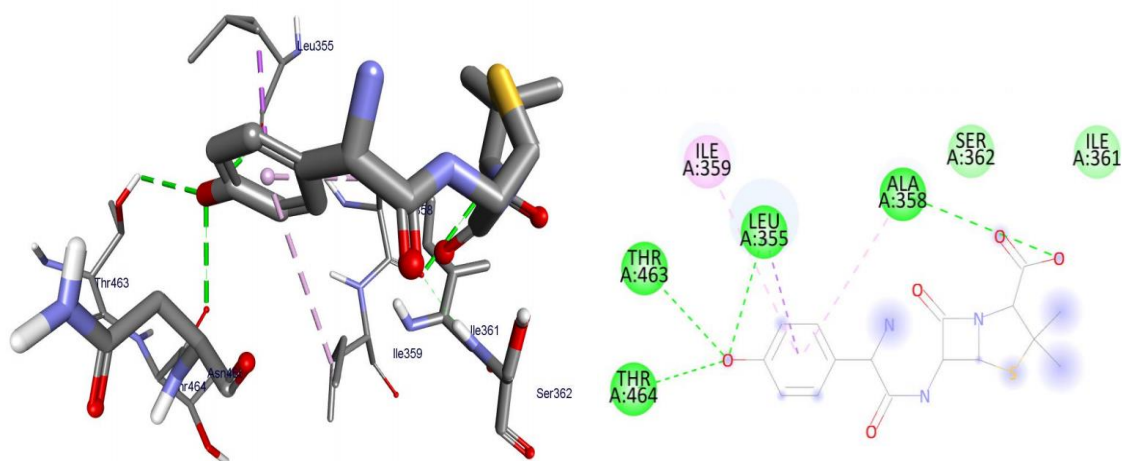

**Appendix XXXIa.** 3D (right) and 2D (left) representations of the binding interactions of **8** against against LuxS of *S. pyogenes* (PDB ID: 4xch)

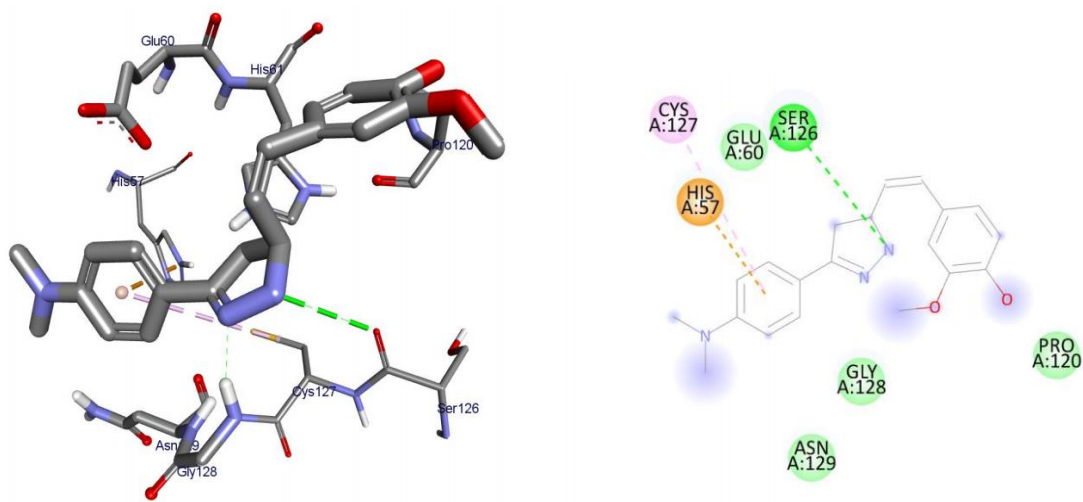

**Appendix XXXIb.** 3D (right) and 2D (left) representations of the binding interactions of **9** against LuxS of *S. pyogenes* (PDB ID: 4xch)

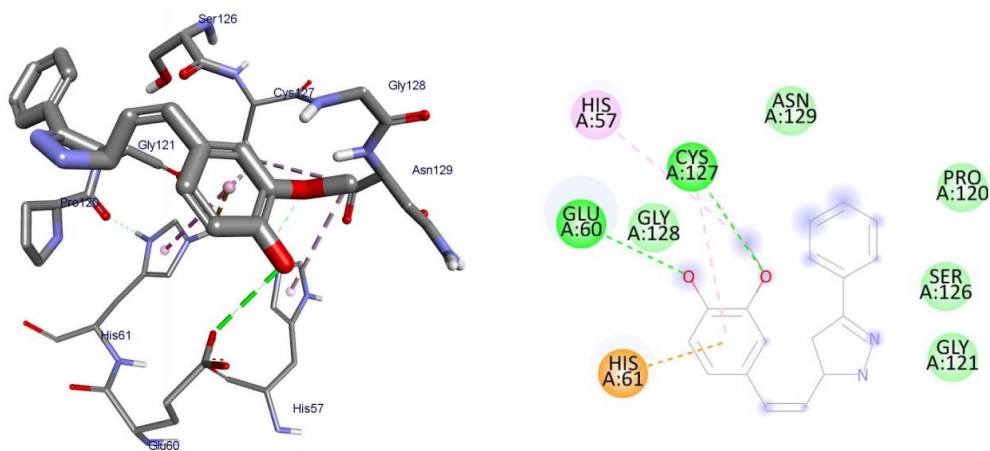

**Appendix XXXIc.** 3D (right) and 2D (left) representations of the binding interactions of **10** against LuxS of *S. pyogenes* (PDB ID: 4xch)

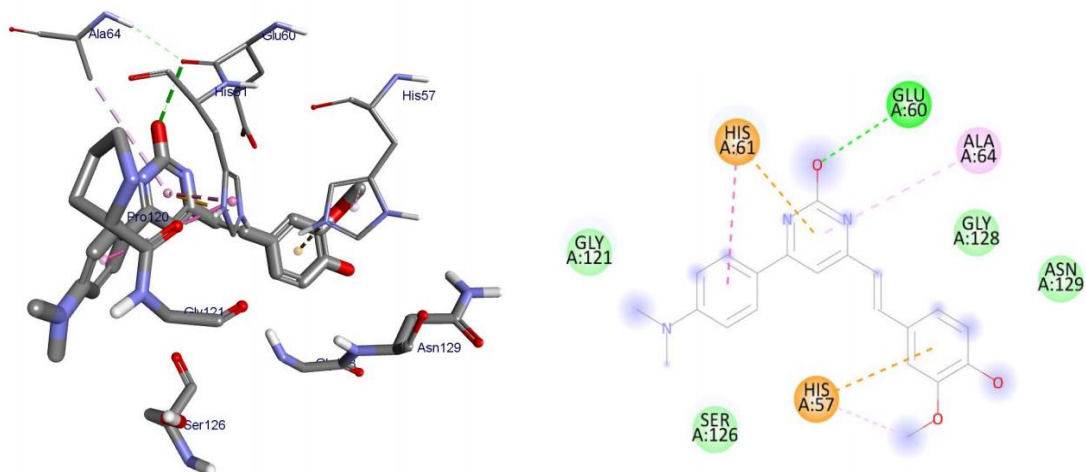

**Appendix XXXId.** 3D (right) and 2D (left) representations of the binding interactions of **11** against LuxS of *S. pyogenes* (PDB ID: 4xch)

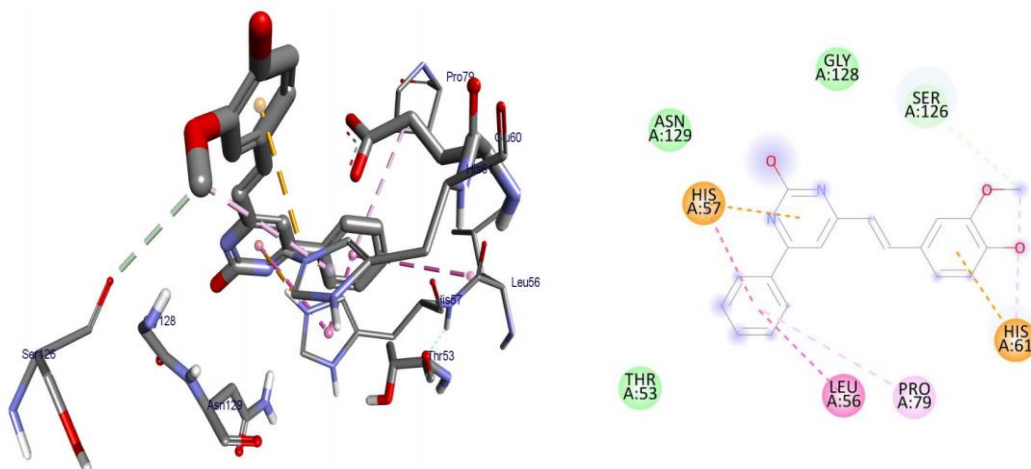

**Appendix XXXIe.** 3D (right) and 2D (left) representations of the binding interactions of **12** against LuxS of *S. pyogenes* (PDB ID: 4xch)

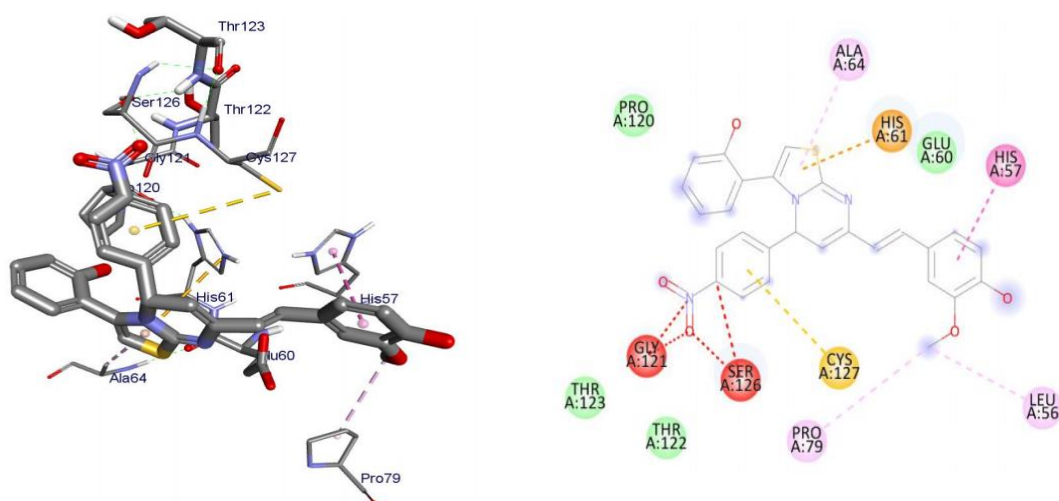

**Appendix XXXIf.** 3D (right) and 2D (left) representations of the binding interactions of **13** against LuxS of *S. pyogenes* (PDB ID: 4xch)



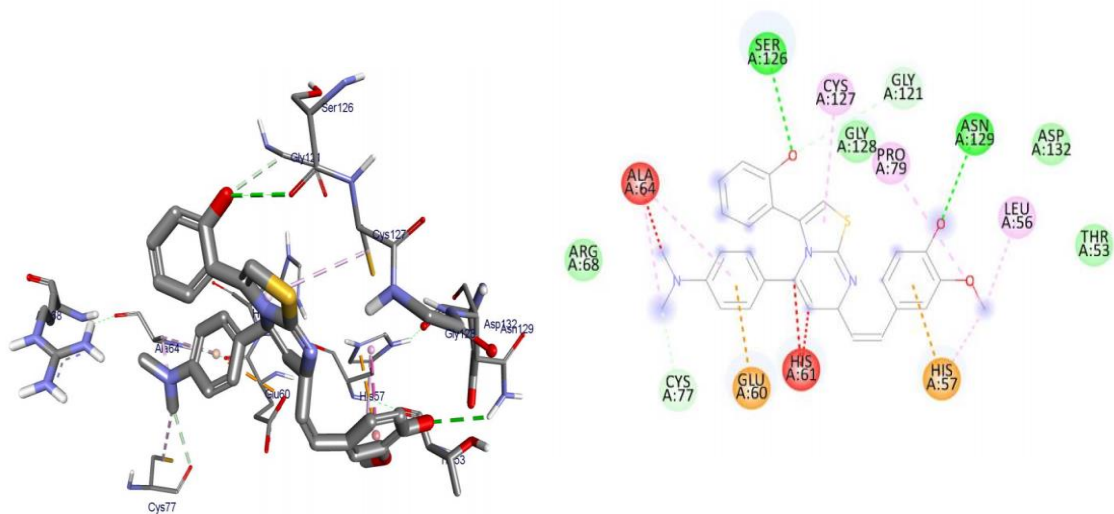

**Appendix XXXIg.** 3D (right) and 2D (left) representations of the binding interactions of **14** against LuxS of *S. pyogenes* (PDB ID: 4xch)

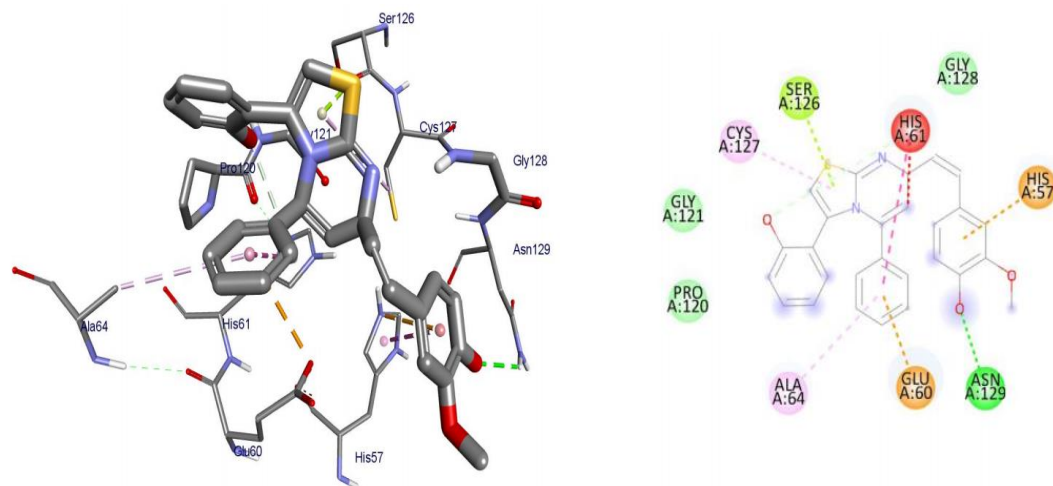

**Appendix XXXIh.** 3D (right) and 2D (left) representations of the binding interactions of **15** against LuxS of *S. pyogenes* (PDB ID: 4xch)

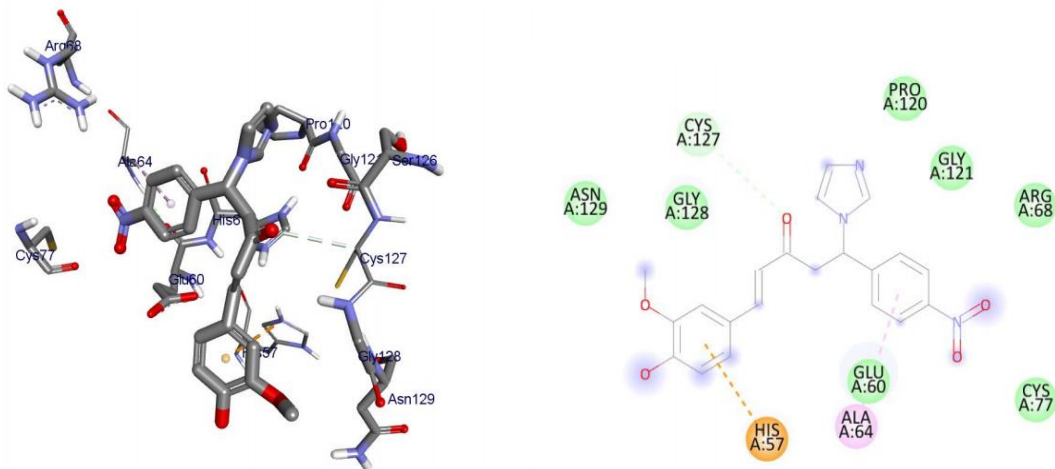

**Appendix XXXIi.** 3D (right) and 2D (left) representations of the binding interactions of **16** against LuxS of *S. pyogenes* (PDB ID: 4xch)

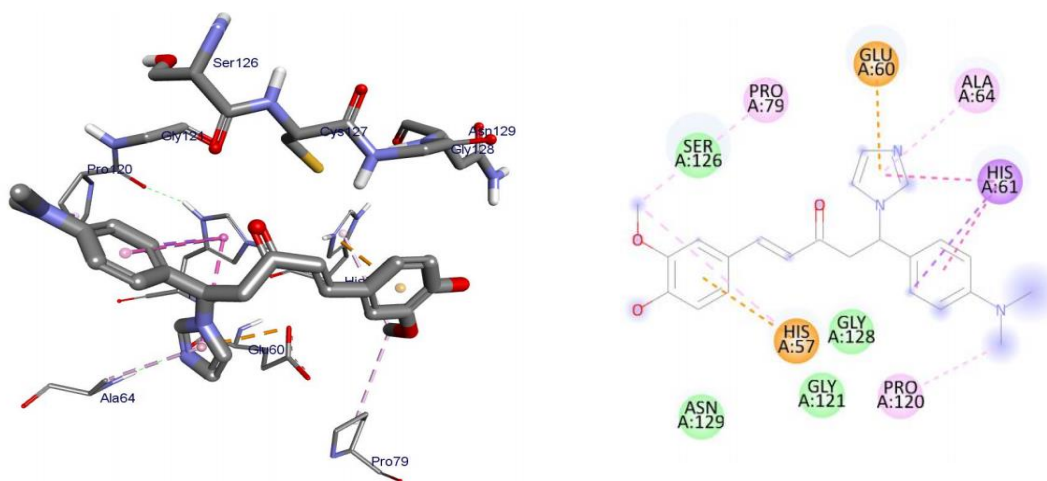

**Appendix XXXIj.** 3D (right) and 2D (left) representations of the binding interactions of **amoxicillin** against LuxS of *S. pyogenes* (PDB ID: 4xch)

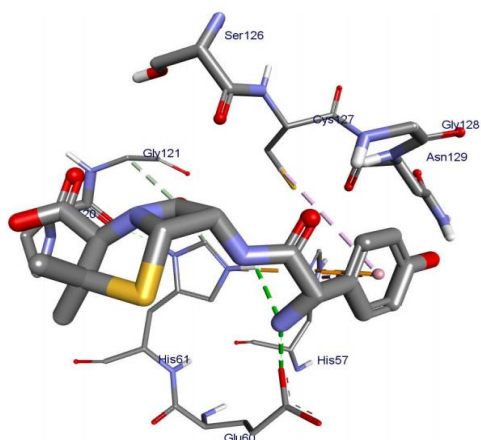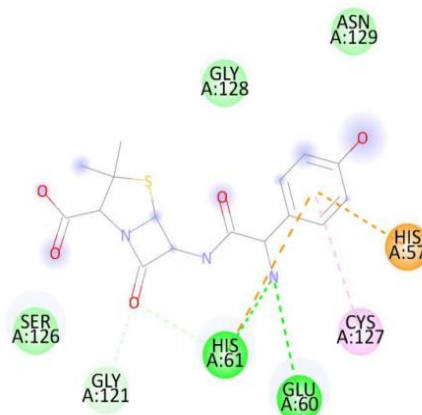

**Appendix XXXIIa.** 3D (right) and 2D (left) representations of the binding interactions of **8** against Penicillin binding proteins (PBPs) (PDB ID: 1VQQ).

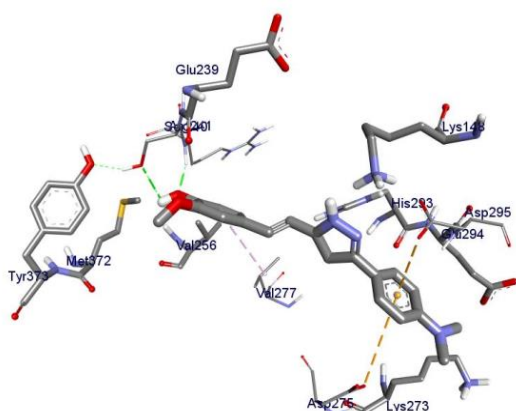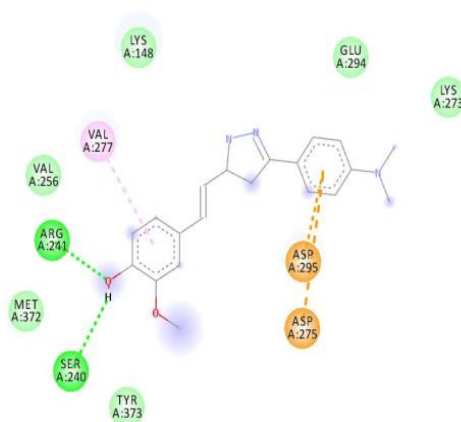

**Appendix XXXIIb.** 3D (right) and 2D (left) representations of the binding interactions of **11** against Penicillin binding proteins (PBPs) (PDB ID: 1VQQ).

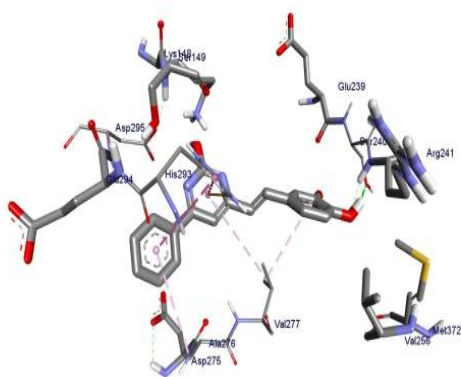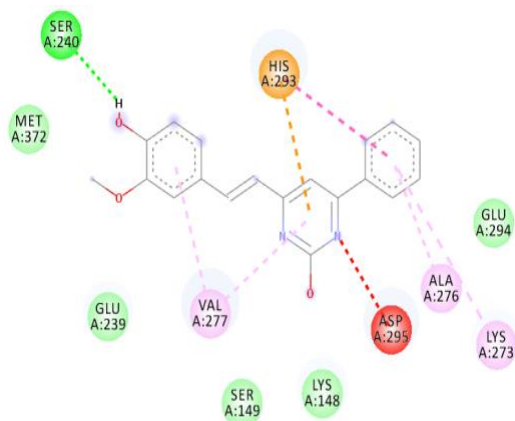

**Appendix XXXIIc.** 3D (right) and 2D (left) representations of the binding interactions of **16** against Penicillin binding proteins (PBPs) (PDB ID: 1VQQ).

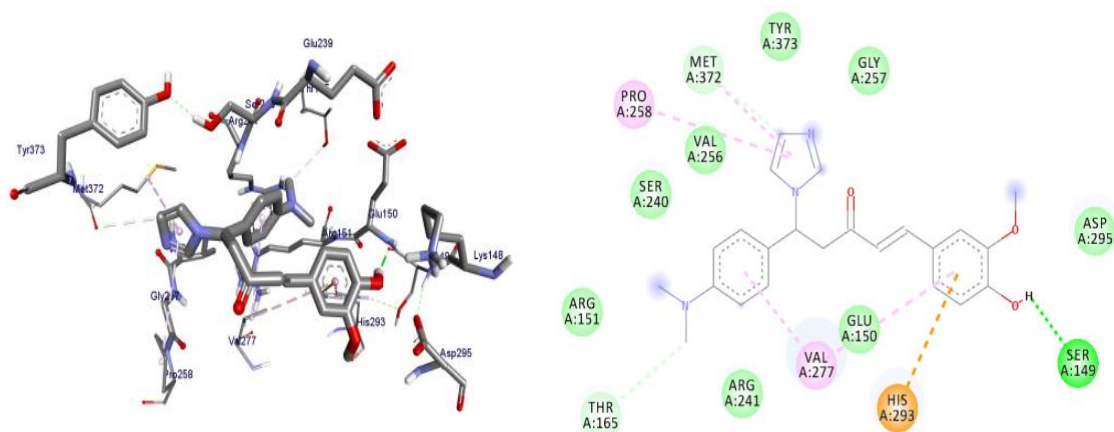

**Appendix XXXIIId.** 3D (right) and 2D (left) representations of the binding interactions of **amoxicillin** against Penicillin binding proteins (PBPs) (PDB ID: 1VQQ).

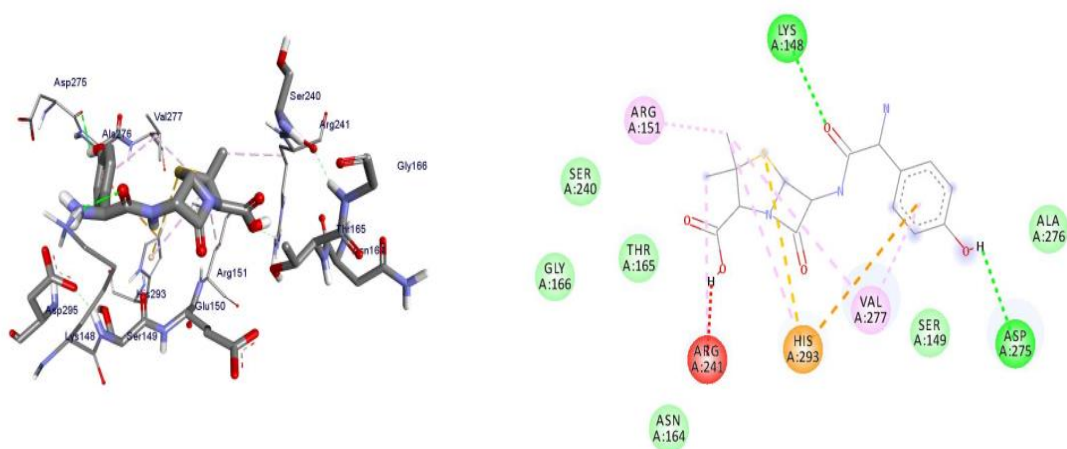

**Appendix XXXIIIa.** 3D (right) and 2D (left) representations of the binding interactions of **8** against  $\beta$ -lactamases (PDB ID: 1IYS)

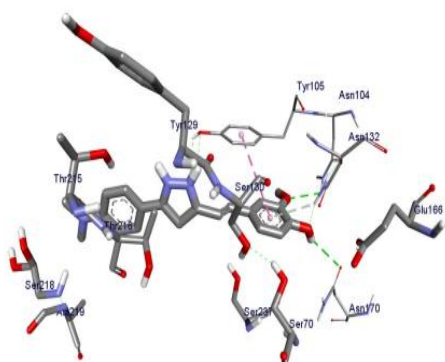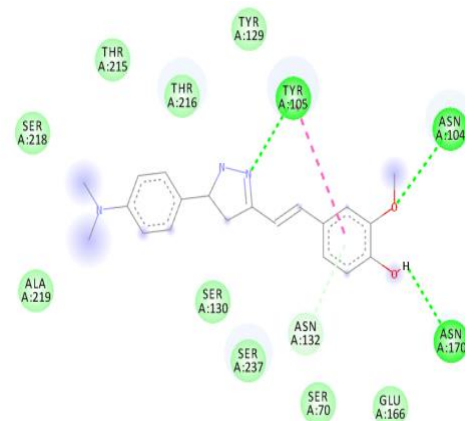

**Appendix XXXIIIb.** 3D (right) and 2D (left) representations of the binding interactions of **11** against  $\beta$ -lactamases (PDB ID: 1IYS)

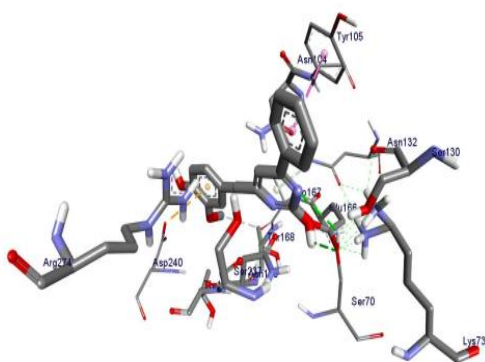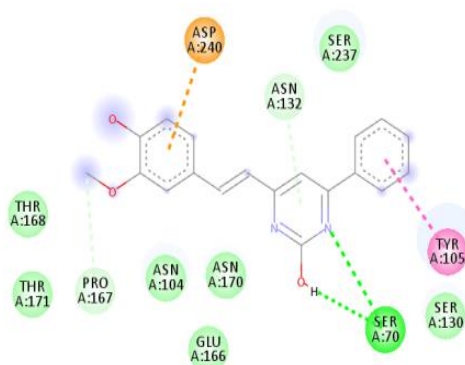

**Appendix XXXIIIc.** 3D (right) and 2D (left) representations of the binding interactions of **16** against  $\beta$ -lactamases (PDB ID: 1IYS)

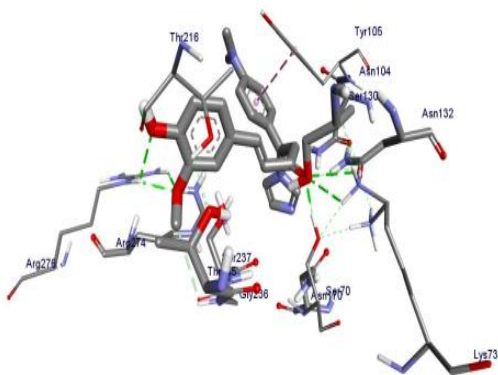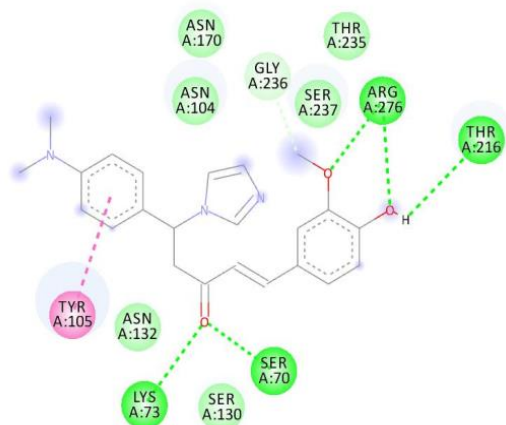

**Appendix XXXIII d.** 3D (right) and 2D (left) representations of the binding interactions of **amoxicillin** against  $\beta$ -lactamases (PDB ID: 1IYS)

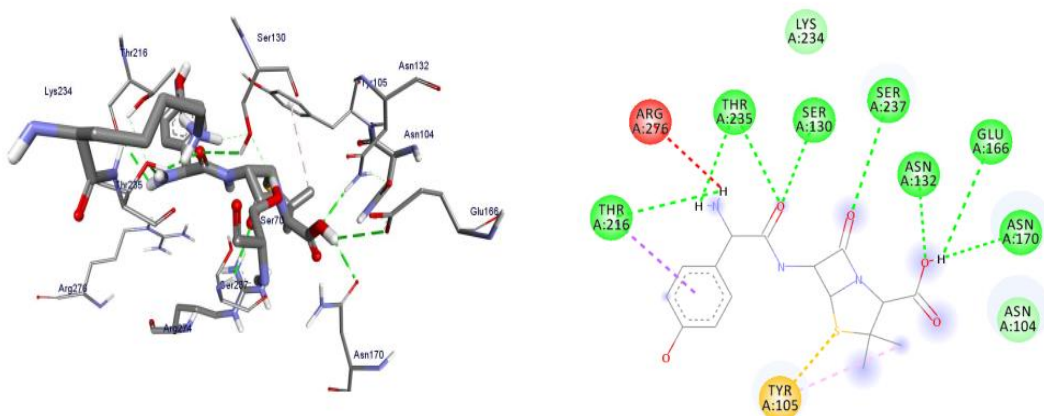

**Appendix XXXIV a.** 3D (right) and 2D (left) representations of the binding interactions of **8** against Human peroxiredoxin 5 (PDB ID: 1hd2).

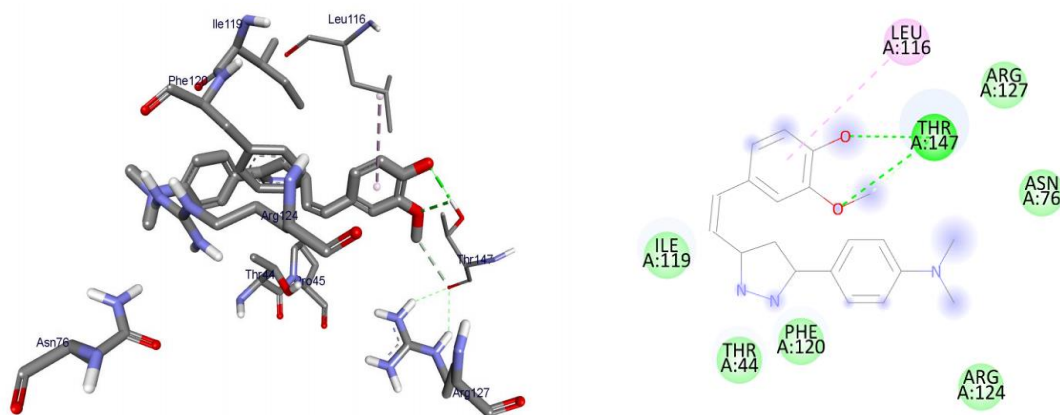

**Appendix XXXIV b.** 3D (right) and 2D (left) representations of the binding interactions of **9** against Human peroxiredoxin 5 (PDB ID: 1hd2).

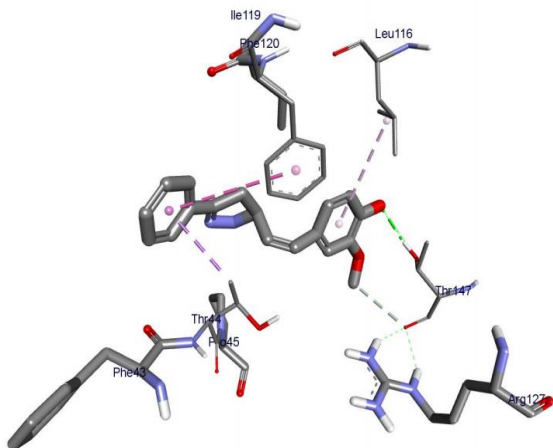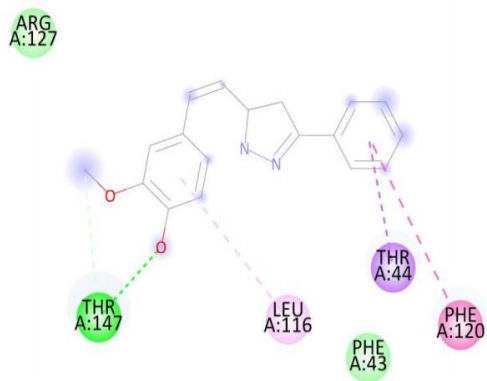

**Appendix XXXIVc.** 3D (right) and 2D (left) representations of the binding interactions of **10** against Human peroxiredoxin 5 (PDB ID: 1hd2).

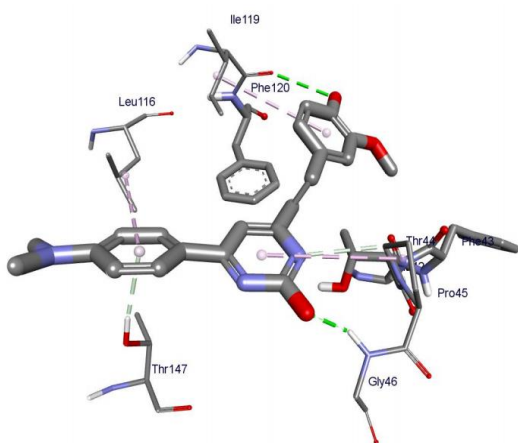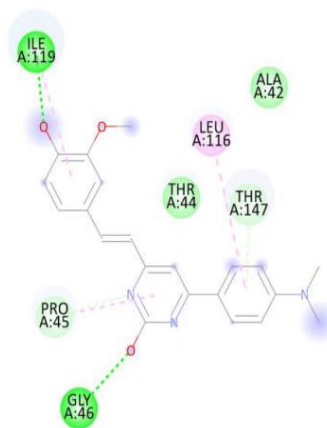

**Appendix XXXIVd.** 3D (right) and 2D (left) representations of the binding interactions of **11** against Human peroxiredoxin 5 (PDB ID: 1hd2).

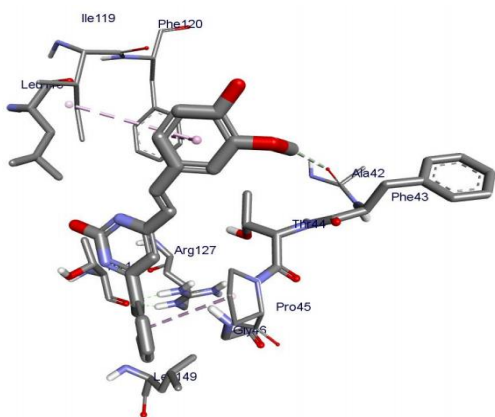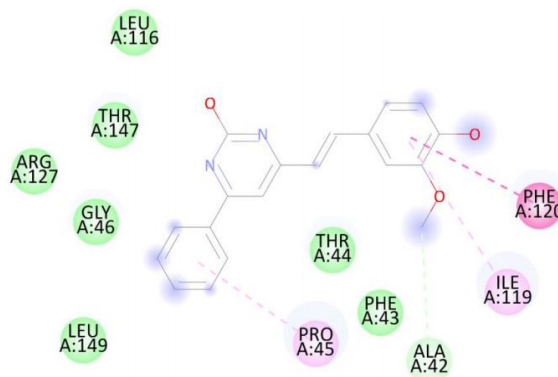

**Appendix XXXIVe.** 3D (right) and 2D (left) representations of the binding interactions of **12** against Human peroxiredoxin 5 (PDB ID: 1hd2).

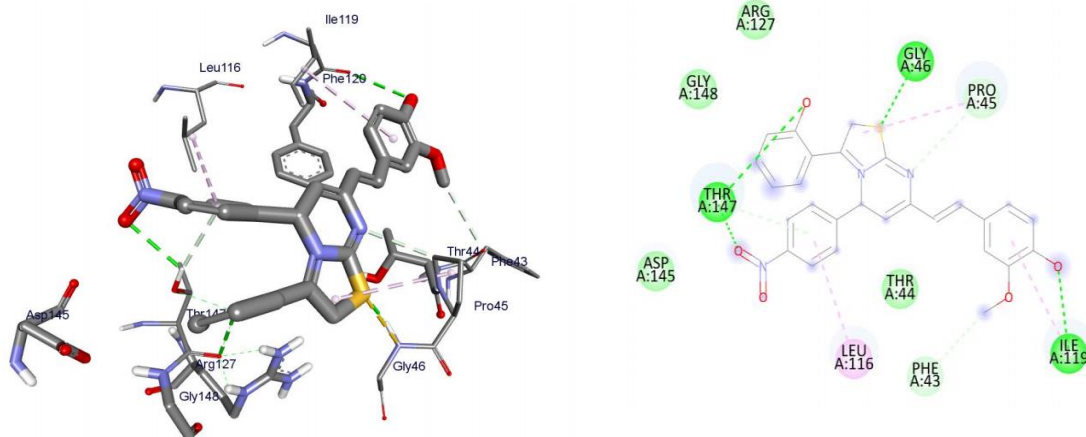

**Appendix XXXIVf.** 3D (right) and 2D (left) representations of the binding interactions of **13** against Human peroxiredoxin 5 (PDB ID: 1hd2).

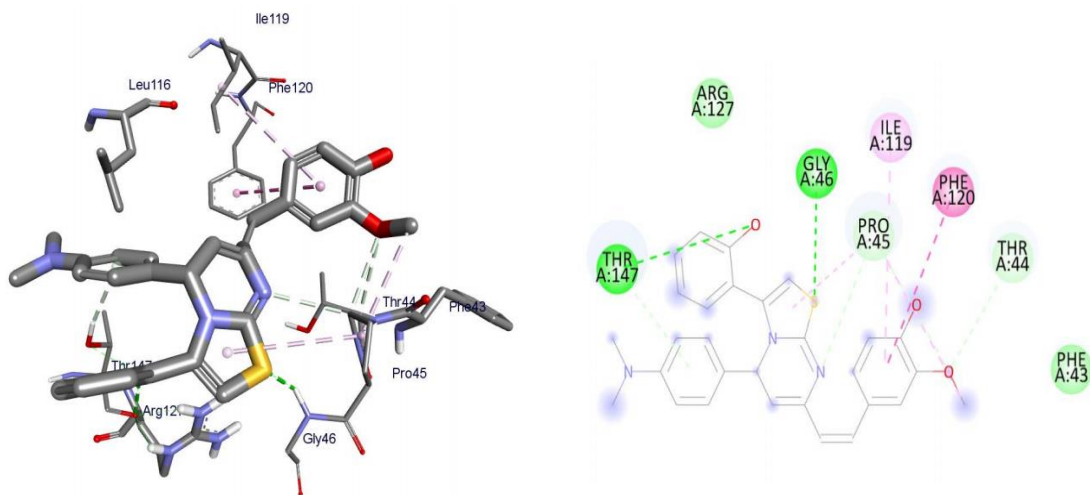

**Appendix XXXIVg.** 3D (right) and 2D (left) representations of the binding interactions of **14** against Human peroxiredoxin 5 (PDB ID: 1hd2).



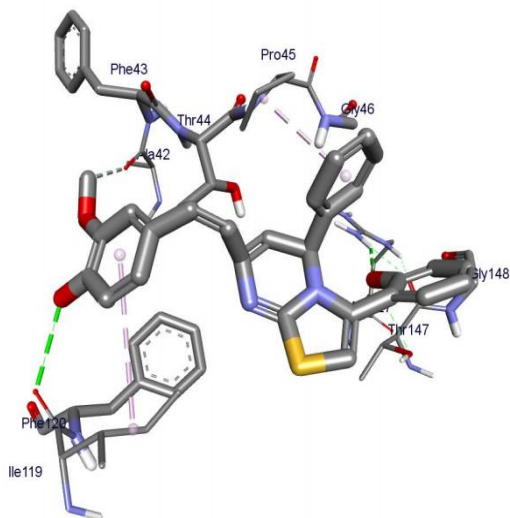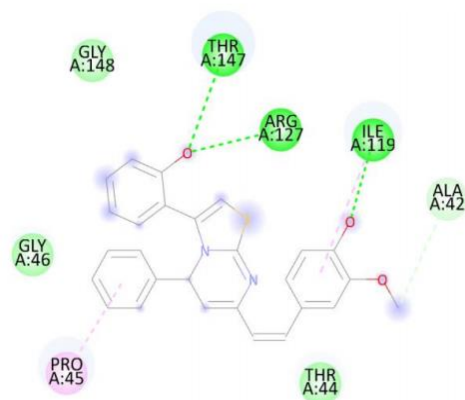

**Appendix XXXIVh.** 3D (right) and 2D (left) representations of the binding interactions of **15** against Human peroxiredoxin 5 (PDB ID: 1hd2).

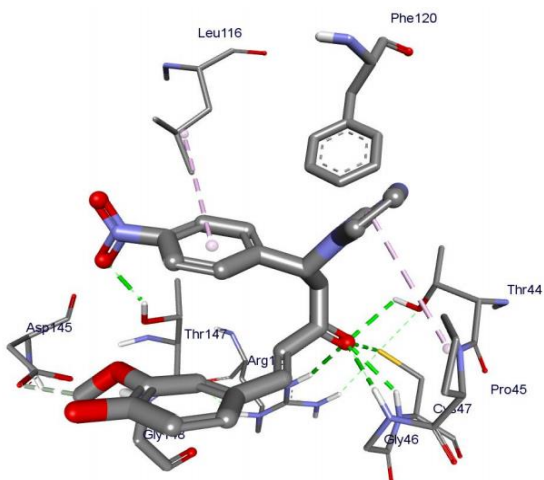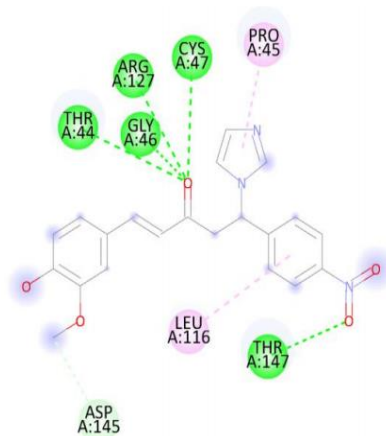

**Appendix XXXIVi.** 3D (right) and 2D (left) representations of the binding interactions of **16** against Human peroxiredoxin 5 (PDB ID: 1hd2).

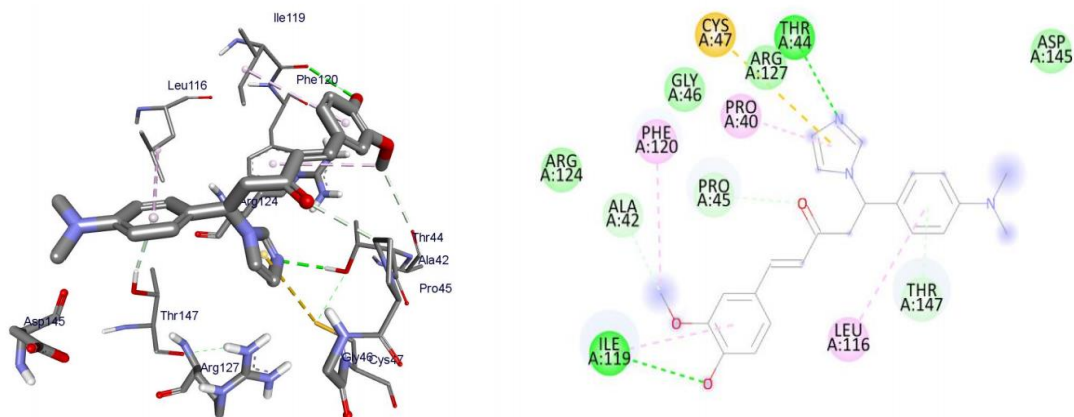

**Appendix XXXIVj.** 3D (right) and 2D (left) representations of the binding interactions of **vitamin C** against Human peroxiredoxin 5 (PDB ID: 1hd2).

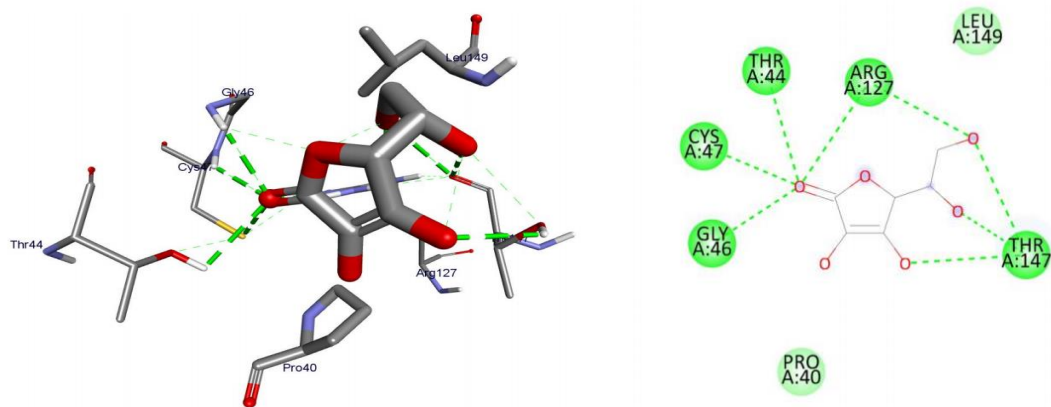

**Appendix XXXVa.** 3D (right) and 2D (left) representations of the binding interactions of **8** against  $\alpha$ -amylase enzyme (PDB ID: 4w93)

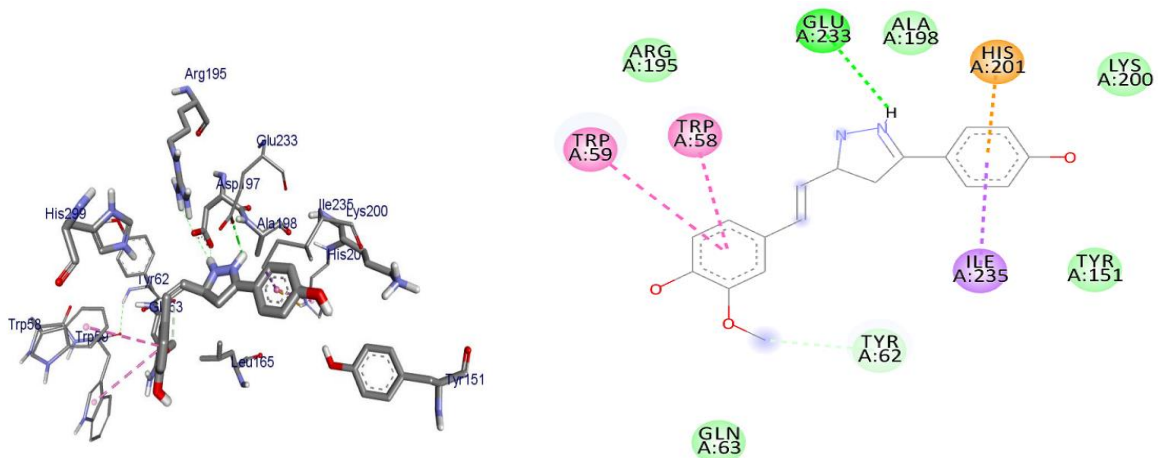

**Appendix XXXVb.** 3D (right) and 2D (left) representations of the binding interactions of **11** against  $\alpha$ -amylase enzyme (PDB ID: 4w93)

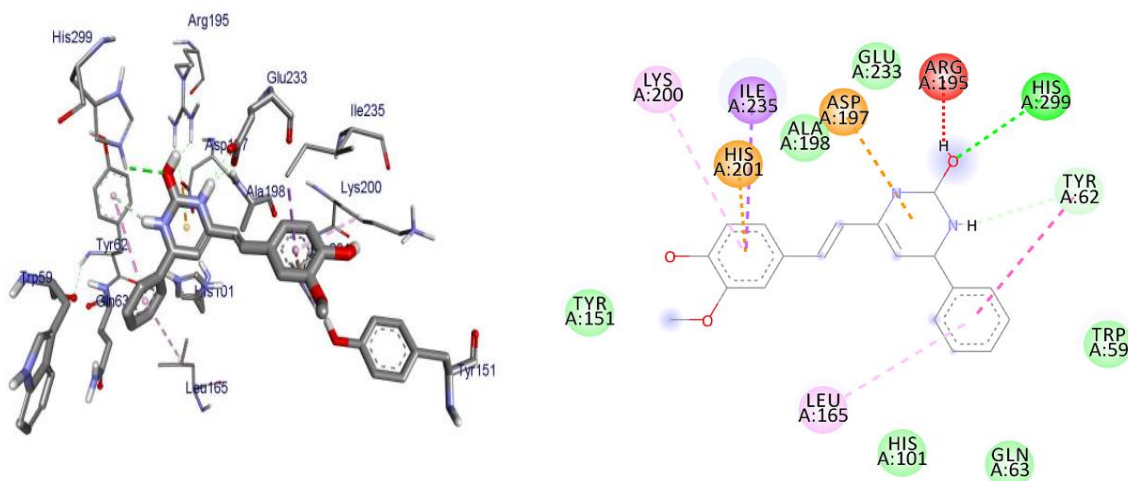

**Appendix XXXVc.** 3D (right) and 2D (left) representations of the binding interactions of **16** against  $\alpha$ -amylase enzyme (PDB ID: 4w93)

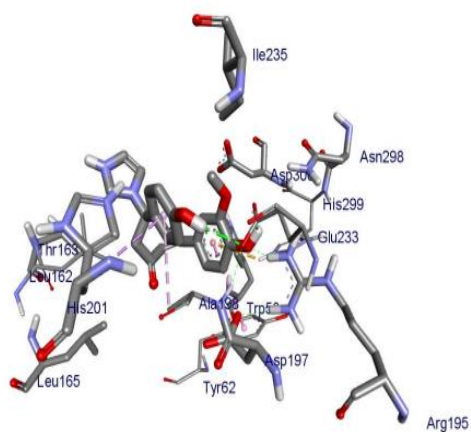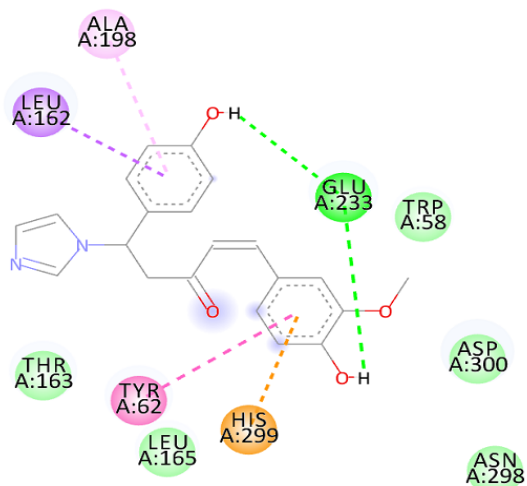

**Appendix XXXVd.** 3D (right) and 2D (left) representations of the binding interactions of **acarbose** against  $\alpha$ -amylase enzyme (PDB ID: 4w93)

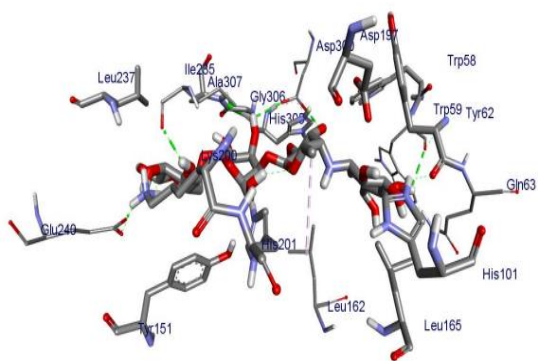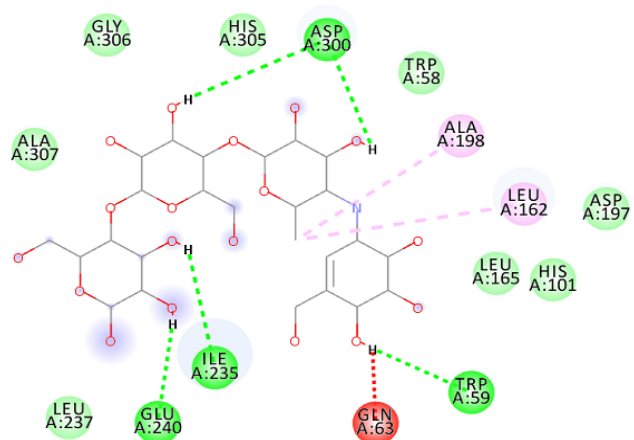

Supplement: Supplementary file 1 [file get_supplementary_file.php]
